# Supplementary material
Source: publisher site journal article supplement (https://www.spandidos-publications.com/5098/downloadSupplementary)
Supplement: Supplementary file 1 [file downloadSupplementary]

## Sheet: Table S1
Table SI. Expression level of DNase family genes in tumor and tumor-adjacent normal tissues of all 33 cancer types in TCGA data set.
ID	DNASE1	DNASE1L1	DNASE1L2	DNASE1L3	DNASE2	DNASE2B	Type	Cancer type
TCGA-OR-A5JP-01A	0.946461	1.78271	0.687354	0.680419	4.30349	0.171211	Tumor	ACC
TCGA-OR-A5JG-01A	0.791486	2.50677	0.915508	0.277772	3.68966	0.705957	Tumor	ACC
TCGA-OR-A5LG-01A	0.88047	2.89723	0.414416	1.9218	5.16342	0.0538737	Tumor	ACC
TCGA-OR-A5JR-01A	1.27656	3.30168	0.523945	1.13289	4.49909	0.0169731	Tumor	ACC
TCGA-OR-A5KU-01A	1.0193	2.8009	1.00117	0.289926	4.16438	0.0307991	Tumor	ACC
TCGA-OR-A5LS-01A	0.934896	4.07961	1.49079	2.20488	2.47591	0.109123	Tumor	ACC
TCGA-OR-A5L9-01A	0.700701	0.869041	0.0823022	2.34229	2.549	0.120702	Tumor	ACC
TCGA-OR-A5JQ-01A	0.922196	3.39718	0.249077	3.52855	5.27531	0.049651	Tumor	ACC
TCGA-OR-A5K4-01A	2.10009	4.07386	0.947424	0.285095	4.84659	0	Tumor	ACC
TCGA-OR-A5JL-01A	1.18489	3.16513	0.135186	4.29351	4.16148	0.663645	Tumor	ACC
TCGA-OR-A5LC-01A	1.61726	2.32799	1.04636	0.134474	4.84118	0.0874731	Tumor	ACC
TCGA-OR-A5K2-01A	1.03349	1.38521	1.35937	1.43228	3.51178	0.0342069	Tumor	ACC
TCGA-P6-A5OG-01A	1.19016	1.84687	0.379165	0.175549	3.83459	0.227543	Tumor	ACC
TCGA-OR-A5JW-01A	1.21217	2.92613	1.22018	1.12082	4.25319	0.138447	Tumor	ACC
TCGA-OR-A5KO-01A	2.24396	3.99279	1.89834	0.228462	4.83806	0.101907	Tumor	ACC
TCGA-OR-A5J8-01A	0.746826	2.15579	0.364036	0.256386	5.46502	0.413413	Tumor	ACC
TCGA-PA-A5YG-01A	0.694207	4.25516	0.118163	1.15897	4.83284	0.172323	Tumor	ACC
TCGA-OR-A5KV-01A	0.821005	2.80273	4.47725	0.336077	3.79151	0.0332452	Tumor	ACC
TCGA-OR-A5L4-01A	1.22561	3.03568	0.0680798	2.17339	4.54495	0.0756961	Tumor	ACC
TCGA-OR-A5KX-01A	1.60305	2.21079	1.89454	0.140643	5.79776	0.149513	Tumor	ACC
TCGA-OR-A5L8-01A	0.831133	2.10816	0.541501	1.9453	4.6633	0.104643	Tumor	ACC
TCGA-OR-A5JO-01A	0.636129	2.59184	0.170231	3.60037	4.74478	0.107778	Tumor	ACC
TCGA-OR-A5JA-01A	1.38087	3.06995	1.35719	0.0889776	4.49763	0.380188	Tumor	ACC
TCGA-OR-A5LO-01A	0.857783	3.20981	0.874701	0.529628	4.65454	0.385658	Tumor	ACC
TCGA-OR-A5JM-01A	0.804797	2.37779	1.21859	0.0609687	5.26069	0.0558287	Tumor	ACC
TCGA-OR-A5JV-01A	1.08304	3.10403	0.464207	0.1162	4.71054	0.203351	Tumor	ACC
TCGA-OR-A5JB-01A	1.0584	2.13874	0.350043	0.896246	4.31387	0.0194968	Tumor	ACC
TCGA-OR-A5LA-01A	0.998993	2.59949	0.0873265	4.12724	3.83841	0.107413	Tumor	ACC
TCGA-OR-A5JE-01A	0.774413	1.64569	0.844486	0.236329	3.72302	0.0818887	Tumor	ACC
TCGA-OR-A5JZ-01A	1.0763	3.87534	0.477516	0.755333	4.83527	0.0268891	Tumor	ACC
TCGA-OR-A5KT-01A	0.78851	2.14026	0.45622	4.12926	6.00127	0.186778	Tumor	ACC
TCGA-OR-A5KZ-01A	1.70322	1.93873	0.535105	1.20118	5.17606	0	Tumor	ACC
TCGA-OR-A5LJ-01A	0.363476	2.67954	1.49582	0.711439	5.12084	0.0191021	Tumor	ACC
TCGA-OR-A5LB-01A	0.697427	3.38964	0.715159	1.1524	5.15166	0.143161	Tumor	ACC
TCGA-OR-A5LT-01A	1.25372	3.22826	1.53997	0.0714224	3.39367	0.0611506	Tumor	ACC
TCGA-OR-A5LD-01A	1.66707	0.677035	0.29746	0.588145	0.789038	0	Tumor	ACC
TCGA-OR-A5J2-01A	1.17277	3.057	0.246812	0.787472	6.1523	0.0967154	Tumor	ACC
TCGA-PK-A5HB-01A	0.980369	2.19423	0.911748	1.2896	5.53304	0.24117	Tumor	ACC
TCGA-OR-A5JS-01A	1.63339	3.29771	0.923314	0.281712	5.24144	0	Tumor	ACC
TCGA-OR-A5K6-01A	1.23914	2.59652	0.747408	0.605081	3.69817	0.121328	Tumor	ACC
TCGA-OR-A5JY-01A	0.754385	3.20859	1.1826	0.9505	1.70227	0.0713139	Tumor	ACC
TCGA-OR-A5JT-01A	1.32708	3.56322	0.458267	1.12337	4.61181	0.035993	Tumor	ACC
TCGA-PK-A5H8-01A	1.83228	2.88866	1.38283	0.682129	5.1523	0.0879949	Tumor	ACC
TCGA-OR-A5JX-01A	1.36108	2.18859	1.76534	0.982249	4.73382	0.199897	Tumor	ACC
TCGA-OR-A5LK-01A	0.753158	2.80498	0.49165	1.12823	4.61745	0.0408808	Tumor	ACC
TCGA-P6-A5OF-01A	1.66138	3.0068	1.70172	1.1076	5.17804	0.117607	Tumor	ACC
TCGA-OR-A5JI-01A	0.535579	3.1352	0.216472	2.41688	4.42075	0.0455621	Tumor	ACC
TCGA-OR-A5K5-01A	1.24704	2.13101	1.43223	2.08339	4.98689	0.113553	Tumor	ACC
TCGA-OR-A5JC-01A	0.993039	2.44145	1.14044	2.68151	4.68361	0.0621584	Tumor	ACC
TCGA-OR-A5KW-01A	1.41542	2.50772	0.747987	1.06153	5.01525	0.408355	Tumor	ACC
TCGA-OR-A5JJ-01A	1.34035	3.09667	1.59632	0.122404	4.14786	0.0572331	Tumor	ACC
TCGA-OR-A5JD-01A	1.15208	3.85414	0.428782	2.37626	4.51763	0.0780862	Tumor	ACC
TCGA-OR-A5LM-01A	0.908059	2.23404	0.630937	0.248442	4.52118	0.039337	Tumor	ACC
TCGA-PK-A5HA-01A	1.24893	3.67498	0.775267	0.255218	4.24378	0.0547698	Tumor	ACC
TCGA-OR-A5JF-01A	1.0249	3.56757	1.15307	1.79293	4.66254	0.0565595	Tumor	ACC
TCGA-OR-A5LH-01A	0.750442	3.31368	0.118356	2.19197	4.37813	0.398041	Tumor	ACC
TCGA-OR-A5K1-01A	1.3088	2.95524	0.427877	3.44966	4.02902	0	Tumor	ACC
TCGA-OR-A5LN-01A	0.935209	2.69962	0.192569	1.36922	4.22252	0.0811886	Tumor	ACC
TCGA-OR-A5LE-01A	1.64063	2.21404	1.76818	1.88444	1.91829	0.0269064	Tumor	ACC
TCGA-OR-A5L3-01A	0.918232	1.66395	0.568411	2.03485	3.66351	0	Tumor	ACC
TCGA-OU-A5PI-01A	0.745462	3.82542	0.629598	0.474876	4.7724	0	Tumor	ACC
TCGA-OR-A5K8-01A	1.36353	2.33374	1.179	1.86522	4.48533	0.216606	Tumor	ACC
TCGA-OR-A5K0-01A	1.53445	4.29304	1.74336	0.147951	5.61827	0.0253374	Tumor	ACC
TCGA-OR-A5KY-01A	1.10545	2.2228	1.02497	0.387731	3.85094	0.0334916	Tumor	ACC
TCGA-OR-A5J9-01A	1.37079	2.61832	0.62736	1.44542	4.19317	0.0152895	Tumor	ACC
TCGA-OR-A5J1-01A	0.768505	2.00062	0.410507	0.499987	4.20938	0.076372	Tumor	ACC
TCGA-OR-A5J5-01A	1.69104	2.65673	2.61309	0.129192	4.44281	0.127258	Tumor	ACC
TCGA-OR-A5L6-01A	1.38459	2.25755	1.19663	0.596496	4.27997	0	Tumor	ACC
TCGA-OR-A5LP-01A	0.80464	3.80889	0.175846	2.36619	5.49403	0.0639685	Tumor	ACC
TCGA-OR-A5K9-01A	1.13275	1.94348	1.20128	0.176659	5.13176	0.110201	Tumor	ACC
TCGA-OR-A5J7-01A	1.05699	2.64429	0.748878	0.220569	4.85883	0.0797382	Tumor	ACC
TCGA-PK-A5H9-01A	1.3184	2.83583	0.667007	4.72768	3.45052	0	Tumor	ACC
TCGA-OR-A5LR-01A	1.54958	3.37586	0.527182	3.13178	4.4824	0.0301967	Tumor	ACC
TCGA-OR-A5JK-01A	1.38299	2.7244	1.40546	2.12532	5.02362	0.355765	Tumor	ACC
TCGA-OR-A5J6-01A	0.72445	1.98334	0.419964	3.38777	5.16222	0.0205561	Tumor	ACC
TCGA-OR-A5LL-01A	1.18208	3.44527	0.548506	1.59322	6.14227	0.135176	Tumor	ACC
TCGA-OR-A5K3-01A	0.920942	2.76393	1.25635	0.0473698	4.46487	0.250771	Tumor	ACC
TCGA-OR-A5J3-01A	0.865258	3.55337	1.52024	0.0202769	4.44783	0.0845754	Tumor	ACC
TCGA-OR-A5L5-01A	1.11148	3.42379	0.261431	4.72099	4.19337	0.0861351	Tumor	ACC
TCGA-FD-A3SS-01A	1.66026	3.16867	0.709806	0.0483404	4.79464	0.0149009	Tumor	BLCA
TCGA-FD-A43S-01A	1.17707	2.22356	0.600991	1.7603	5.00777	0	Tumor	BLCA
TCGA-UY-A78K-01A	0.678877	2.8487	1.43715	1.9112	4.97843	0.0547228	Tumor	BLCA
TCGA-DK-A2HX-01A	0.980488	2.76541	0.212022	0.162892	5.43313	0.0140767	Tumor	BLCA
TCGA-DK-A1A3-01A	0.278128	3.5093	0.159322	0.161394	5.5831	0.0225855	Tumor	BLCA
TCGA-GC-A6I3-01A	1.22953	2.09674	2.50261	0.320646	5.15496	0.126342	Tumor	BLCA
TCGA-XF-AAMJ-01A	0.89132	2.80823	0.743243	0.222003	4.68038	0.0589958	Tumor	BLCA
TCGA-GC-A6I1-01A	0.766562	2.41554	0.456149	0.397008	5.19802	0.0649718	Tumor	BLCA
TCGA-ZF-A9RL-01A	1.44321	2.48633	1.46155	0.0459792	4.38662	0.0246983	Tumor	BLCA
TCGA-DK-A3IL-01A	2.01767	2.97088	1.70904	0.145204	4.29091	0.0598315	Tumor	BLCA
TCGA-E7-A6MF-01A	1.59639	3.1042	0.46067	0.359383	4.85489	0.0623224	Tumor	BLCA
TCGA-BT-A20R-01A	0.362167	2.57363	0.117788	0.0991574	5.57438	0.0711874	Tumor	BLCA
TCGA-H4-A2HQ-01A	0.690115	2.85373	0.710583	0.0296904	4.95387	0.0211704	Tumor	BLCA
TCGA-GV-A3QH-01A	1.33575	2.67532	1.26392	0	5.27813	0.0845853	Tumor	BLCA
TCGA-4Z-AA82-01A	0.939864	5.15039	0.617769	0.355456	4.63708	0.0218762	Tumor	BLCA
TCGA-E7-A4XJ-01A	2.14431	2.41387	1.78547	0.195551	3.95655	0.158466	Tumor	BLCA
TCGA-XF-A8HE-01A	0.836544	2.1229	0.192989	0.609161	4.72891	0	Tumor	BLCA
TCGA-XF-A9T0-01A	0.813272	2.07812	1.02711	0.0789703	4.76344	0.0956827	Tumor	BLCA
TCGA-FD-A5BT-01A	0.954847	1.84119	0.280777	0.633822	4.87328	0	Tumor	BLCA
TCGA-FD-A3SN-01A	1.08803	3.16994	0.719251	0.0812251	4.96485	0.019666	Tumor	BLCA
TCGA-G2-AA3C-01A	0.758748	2.168	1.16917	0.637266	3.90928	0.0252829	Tumor	BLCA
TCGA-HQ-A2OE-01A	0.682061	1.84987	0.127776	0.251014	4.27403	0	Tumor	BLCA
TCGA-BL-A3JM-01A	1.57208	1.61325	0.585562	0.187349	5.48261	0.0272685	Tumor	BLCA
TCGA-XF-AAN3-01A	0.89122	2.50944	0.357722	0.267796	4.82663	0.145308	Tumor	BLCA
TCGA-FD-A3SR-01A	1.13102	3.27444	0.526983	0.321555	6.4196	0.1136	Tumor	BLCA
TCGA-4Z-AA89-01A	1.2253	2.75189	0.338595	0.0239793	4.19579	0.146964	Tumor	BLCA
TCGA-G2-A2EO-01A	0.865959	2.1076	0.410817	0.103374	5.90103	0.229998	Tumor	BLCA
TCGA-ZF-AA5H-01A	1.496	2.61932	0.554224	0.132974	4.74366	0.095778	Tumor	BLCA
TCGA-BT-A20V-01A	0.909697	2.92201	0.302347	0.374413	5.36779	0	Tumor	BLCA
TCGA-GC-A3WC-01A	1.36087	2.35161	0.401712	2.45119	4.93854	0.317145	Tumor	BLCA
TCGA-GV-A3JV-01A	0.936566	2.77284	0.514282	0.216479	4.93291	0.0609615	Tumor	BLCA
TCGA-YF-AA3M-01A	0.721064	2.27884	0.577224	0.0927005	4.42965	0.0986496	Tumor	BLCA
TCGA-FD-A3B5-01A	0.903062	3.62199	0.253709	2.61484	4.79742	0	Tumor	BLCA
TCGA-BT-A20Q-11A	0.608704	1.33237	0.115349	0.170813	3.82902	0	Normal	BLCA
TCGA-CF-A47V-01A	1.83721	2.93097	1.56933	0.139288	4.65439	0.0182306	Tumor	BLCA
TCGA-GU-A42P-01A	1.23278	2.4484	1.2113	0.0727472	4.67116	0.0143946	Tumor	BLCA
TCGA-BT-A20T-01A	0.929711	3.15539	0.503922	0.0477052	5.34515	0.779919	Tumor	BLCA
TCGA-GC-A3BM-11A	0.912543	2.50698	0.0879164	0.802787	4.25042	0	Normal	BLCA
TCGA-XF-AAN0-01A	1.19172	3.02166	0.629998	0.476679	5.58207	0.0597454	Tumor	BLCA
TCGA-E7-A7DV-01A	1.10802	3.18098	1.09408	0.0938284	4.94994	0.0158181	Tumor	BLCA
TCGA-GV-A40E-01A	1.35602	3.24704	1.06297	0.0504452	4.79079	0.0181343	Tumor	BLCA
TCGA-FJ-A3Z9-01A	1.86166	2.95393	0.8814	0.069841	4.4445	0.234274	Tumor	BLCA
TCGA-XF-A9ST-01A	0.831342	1.49501	0.368613	0.572342	4.54207	0	Tumor	BLCA
TCGA-FJ-A3ZF-01A	1.7829	2.0565	2.09232	0.0483528	4.40365	0.0259831	Tumor	BLCA
TCGA-K4-A3WV-11A	1.29186	3.00981	0.226147	1.7188	4.64451	0.0666734	Normal	BLCA
TCGA-YC-A89H-01A	1.21012	2.67871	0.930962	0.480148	4.85598	0.492693	Tumor	BLCA
TCGA-CF-A9FM-01A	1.47353	2.7781	0.487339	0.0926585	4.85941	0	Tumor	BLCA
TCGA-DK-A1AD-01A	0.952278	3.42533	0.662067	0.16383	5.40684	0.146483	Tumor	BLCA
TCGA-G2-A2EK-01A	1.48253	2.73669	0.193014	0.544912	4.87821	0.376176	Tumor	BLCA
TCGA-E5-A2PC-01A	1.16882	3.42963	0.0530426	0.0124977	4.21619	0	Tumor	BLCA
TCGA-C4-A0F1-01A	0.23836	3.08968	0.0121157	0.248637	4.32293	0	Tumor	BLCA
TCGA-FD-A43N-01A	0.974824	2.96534	0.598854	0.190824	4.69323	0.495007	Tumor	BLCA
TCGA-BL-A13J-01A	0.915309	2.2059	0.240767	0.0956417	4.82257	0.218926	Tumor	BLCA
TCGA-FD-A3SO-01A	0.763273	2.53107	0.42953	4.32589	4.21278	0.152453	Tumor	BLCA
TCGA-XF-A8HD-01A	1.20608	3.45131	0.988575	0.0449668	5.12326	0.0161452	Tumor	BLCA
TCGA-BT-A20X-01A	0.339069	3.12736	0.431519	0.25628	4.42876	0	Tumor	BLCA
TCGA-ZF-AA52-01A	1.22773	2.23535	1.30588	0.299696	5.28066	0.101586	Tumor	BLCA
TCGA-DK-AA76-01A	0.216015	2.25832	0.863735	0.132986	5.92076	0.946171	Tumor	BLCA
TCGA-GV-A3JW-01A	1.37827	2.64188	0.795651	0.0591697	4.4804	0.0935177	Tumor	BLCA
TCGA-FD-A3N6-01A	0.860053	2.67631	0.542058	0.635945	3.23364	0	Tumor	BLCA
TCGA-BT-A2LA-11A	0.617033	2.32678	0.124231	0.80908	4.86056	0.0628915	Normal	BLCA
TCGA-CU-A5W6-01A	0.786135	2.89699	0.314931	0.209666	6.151	0.0412567	Tumor	BLCA
TCGA-DK-A2I4-01A	0.960834	2.50739	0.405436	0.151559	5.36798	0.567874	Tumor	BLCA
TCGA-DK-AA6M-01A	0.934914	2.55198	0.76182	1.06919	5.13206	0	Tumor	BLCA
TCGA-4Z-AA7Y-01A	1.06291	3.03515	0.431575	0.0406706	5.2514	0.166022	Tumor	BLCA
TCGA-DK-A3WY-01A	2.29994	2.53891	0.506312	1.77689	5.51503	0.20093	Tumor	BLCA
TCGA-E7-A3X6-01A	0.938749	3.29159	0.363539	0.145491	5.17238	0.0564948	Tumor	BLCA
TCGA-K4-A3WV-01A	1.92562	1.17993	1.12195	0.0961258	5.98908	0.041789	Tumor	BLCA
TCGA-DK-A3IQ-01A	0.908629	2.93538	0.422055	0.0401156	4.5678	0.0342927	Tumor	BLCA
TCGA-ZF-AA56-01A	0.757172	2.65079	0.0917163	0.517344	4.99499	0.0199695	Tumor	BLCA
TCGA-CU-A3QU-01A	0.694901	3.08419	0.507707	0.0439656	5.39625	0.387345	Tumor	BLCA
TCGA-FD-A6TI-01A	0.799088	3.5839	0.472298	0.383273	5.73136	0.0735994	Tumor	BLCA
TCGA-XF-A9T3-01A	1.1124	2.23573	0.682806	0.236914	4.25288	0	Tumor	BLCA
TCGA-FD-A3B3-01A	0.571909	1.60914	0.39546	1.42496	4.45751	0.0124699	Tumor	BLCA
TCGA-BT-A20U-11A	1.13692	2.18816	0.560354	2.78299	3.50829	0	Normal	BLCA
TCGA-YF-AA3L-01A	1.2337	2.54272	1.87068	0.309933	5.43139	0	Tumor	BLCA
TCGA-K4-A54R-11A	0.595289	2.43068	0.231754	1.11195	3.67839	0	Normal	BLCA
TCGA-SY-A9G0-01A	0.868339	2.71367	0.355722	0.689296	4.80929	0.0282761	Tumor	BLCA
TCGA-ZF-A9R2-01A	0.635012	2.02113	0.733855	0	5.09834	0	Tumor	BLCA
TCGA-GU-AATQ-01A	0.95666	3.16856	1.16406	0.230161	4.89835	0	Tumor	BLCA
TCGA-FD-A5C1-01A	0.680427	2.88265	0.771517	0.325661	5.09127	0.0818709	Tumor	BLCA
TCGA-DK-A2I1-01A	0.609241	2.82275	0.195042	0.145995	5.68721	0	Tumor	BLCA
TCGA-CF-A5U8-01A	1.34647	3.12478	0.578686	0.109453	4.75605	0.0434347	Tumor	BLCA
TCGA-UY-A9PB-01A	1.17717	3.0721	0.241541	0.183316	5.15572	0.0511935	Tumor	BLCA
TCGA-DK-A3X1-01A	1.45177	2.69457	0.990091	0.0191294	6.22295	0.0991874	Tumor	BLCA
TCGA-DK-A1AC-01A	0.627581	1.88403	0.628418	0.0644045	4.67228	0.0460807	Tumor	BLCA
TCGA-FD-A62N-01A	0.891096	2.51818	0.318094	2.00828	6.03799	0.333118	Tumor	BLCA
TCGA-DK-AA75-01A	1.47531	1.52032	1.04786	0.0518433	4.27927	0.0370474	Tumor	BLCA
TCGA-XF-A9SL-01A	0.706579	2.47149	0.306677	1.97917	5.04002	0.0435057	Tumor	BLCA
TCGA-XF-A9T4-01A	0.790766	3.08168	0.354223	0.112121	4.8362	0.0488958	Tumor	BLCA
TCGA-XF-AAN2-01A	0.851407	2.0635	0.617474	0.14991	5.04643	0.0658595	Tumor	BLCA
TCGA-BT-A2LD-01A	1.192	2.9077	0.438643	0.436994	5.34794	0	Tumor	BLCA
TCGA-BT-A20N-11A	0.460553	1.39625	0.041031	0.497921	3.54233	0	Normal	BLCA
TCGA-ZF-A9R1-01A	1.10338	2.81764	0.931288	0.211672	5.01481	0.043541	Tumor	BLCA
TCGA-ZF-A9R9-01A	1.06505	2.17364	1.36548	0.151717	4.73468	0.175051	Tumor	BLCA
TCGA-DK-A6AV-01A	0.682515	3.71314	0.957175	0.379344	4.67845	0.159145	Tumor	BLCA
TCGA-XF-AAMY-01A	1.54611	3.01053	0.890329	0.0633639	5.41952	0.131933	Tumor	BLCA
TCGA-GU-A763-01A	0.82977	1.93606	0.61362	0.0587502	4.98532	0.173822	Tumor	BLCA
TCGA-FD-A3B7-01A	0.608428	2.30811	0.032391	1.4406	4.90983	0.0161401	Tumor	BLCA
TCGA-FD-A3NA-01A	0.859503	3.10537	0.509201	0.0785373	5.16822	0	Tumor	BLCA
TCGA-CF-A47T-01A	0.595613	1.83267	0.252047	0.0496472	4.17405	0.042461	Tumor	BLCA
TCGA-CU-A0YN-11A	0.554184	1.46873	0.0171054	0.396028	4.11717	0.0253536	Normal	BLCA
TCGA-BT-A0S7-01A	0.684026	2.06384	0.102163	1.10138	4.67339	0	Tumor	BLCA
TCGA-GC-A3BM-01A	1.51429	2.64805	0.280496	0.16947	4.91857	0.110701	Tumor	BLCA
TCGA-GD-A3OP-01A	1.23378	2.92781	0.591173	0.465559	4.93243	0.0967219	Tumor	BLCA
TCGA-SY-A9G5-01A	0.924786	3.03369	0.369499	0.186933	5.05922	0	Tumor	BLCA
TCGA-KQ-A41S-01A	0.91571	2.71774	0.990342	0.280826	5.19336	0	Tumor	BLCA
TCGA-4Z-AA7M-01A	1.52255	2.81192	0.483967	0.156248	5.45555	0	Tumor	BLCA
TCGA-FD-A3SJ-01A	0.975115	1.71542	0.275974	0.180871	4.20904	0.0669211	Tumor	BLCA
TCGA-E7-A677-01A	1.59928	2.9696	0.661754	0.146041	4.78579	0	Tumor	BLCA
TCGA-UY-A8OD-01A	1.16833	3.00633	1.42518	0.251806	4.60818	0.112825	Tumor	BLCA
TCGA-DK-AA6L-01A	1.35814	3.25759	0.925727	0.0831266	5.66791	0.0258385	Tumor	BLCA
TCGA-GD-A2C5-01A	0.923319	2.67182	0.70984	0.184353	5.83766	0	Tumor	BLCA
TCGA-K4-A4AC-01A	0.62434	2.54803	0.550881	0.51559	4.31458	0.0230051	Tumor	BLCA
TCGA-FD-A62O-01A	0.971466	2.96834	0.654549	0.0914991	4.54216	0.0222136	Tumor	BLCA
TCGA-BT-A2LB-01A	0.977849	3.02959	0.591091	0.243834	5.01887	0.0311381	Tumor	BLCA
TCGA-FD-A3N5-01A	1.07494	2.80619	0.873826	3.2237	4.4749	0.0136683	Tumor	BLCA
TCGA-G2-A3VY-01A	1.93603	3.76418	1.44965	0.036118	6.1025	0.105271	Tumor	BLCA
TCGA-DK-A1AA-01A	0.772593	2.79847	0.116457	0.10651	4.8963	0.0677261	Tumor	BLCA
TCGA-XF-A9SY-01A	0.615226	2.34183	0.153054	1.11195	4.71994	0	Tumor	BLCA
TCGA-DK-AA6Q-01A	0.690142	2.70045	0.825177	1.85065	5.74799	0	Tumor	BLCA
TCGA-G2-A2EL-01A	1.57314	2.41811	0.976253	0.294316	4.33649	0	Tumor	BLCA
TCGA-E7-A6ME-01A	1.09045	2.82875	1.12066	0.15361	5.56136	0	Tumor	BLCA
TCGA-HQ-A2OF-01A	1.19888	2.10776	0.36596	0.0278257	4.99495	0.50116	Tumor	BLCA
TCGA-FD-A6TF-01A	0.999837	2.71175	0.468624	0.511508	5.8394	0.0185851	Tumor	BLCA
TCGA-FD-A3SP-01A	0.798442	2.30499	0.352739	0.196915	5.40184	0.0530129	Tumor	BLCA
TCGA-BT-A20P-01A	1.30635	2.13129	1.13991	0	4.85189	0.102361	Tumor	BLCA
TCGA-GV-A40G-01A	1.38188	2.90698	1.06258	0.0217282	5.43089	0.0307972	Tumor	BLCA
TCGA-CF-A47S-01A	1.42189	2.67812	0.497852	0.127698	4.81415	0.0387533	Tumor	BLCA
TCGA-XF-A9T2-01A	1.99013	1.97662	0.369468	3.60582	4.70343	0	Tumor	BLCA
TCGA-CF-A9FH-01A	1.69339	2.48256	1.1917	0.0241599	4.45401	0.0257498	Tumor	BLCA
TCGA-ZF-AA4X-01A	1.84841	2.95884	1.95562	0.0933982	4.78137	0.22795	Tumor	BLCA
TCGA-XF-AAMQ-01A	0.871976	2.75138	0.503383	1.02039	4.96388	0.247372	Tumor	BLCA
TCGA-CF-A3MH-01A	1.33758	2.69575	1.57222	0	4.48619	0.0485785	Tumor	BLCA
TCGA-DK-AA6W-01A	1.29268	1.78014	1.69339	0.434395	5.34358	0.0950767	Tumor	BLCA
TCGA-KQ-A41O-01A	1.04672	1.84767	1.41134	0.135262	4.26023	0.0230791	Tumor	BLCA
TCGA-FJ-A3Z7-01A	0.992101	1.32234	0.705379	0.483839	3.60833	0.0179184	Tumor	BLCA
TCGA-S5-AA26-01A	1.79683	2.322	1.61523	0.118655	4.22567	0.0574551	Tumor	BLCA
TCGA-FD-A3B4-01A	1.18559	3.49906	0.338998	2.42668	4.93631	0.027446	Tumor	BLCA
TCGA-GC-A3OO-01A	0.865392	2.67919	0.255781	0.375657	4.60458	0.29945	Tumor	BLCA
TCGA-XF-A9SP-01A	0.845267	2.68839	0.501565	0.896576	5.70273	0.197068	Tumor	BLCA
TCGA-FD-A3SL-01A	0.428156	2.59754	0.406079	0.279314	5.50374	0.287943	Tumor	BLCA
TCGA-FD-A6TB-01A	1.06729	2.98583	0.571744	0.752129	5.38873	0.0388279	Tumor	BLCA
TCGA-FD-A6TA-01A	0.919763	2.8178	0.701181	0.202485	5.65438	0.139449	Tumor	BLCA
TCGA-XF-A8HB-01A	0.995621	2.76126	0.435578	0.253677	5.42561	0	Tumor	BLCA
TCGA-UY-A8OB-01A	0.736654	3.00186	0.720494	0.134051	4.54454	0	Tumor	BLCA
TCGA-GU-A767-01A	0.775843	2.65184	0.468551	0.860503	5.47613	0.0204268	Tumor	BLCA
TCGA-FD-A43U-01A	1.01881	2.10415	1.04693	0.851508	6.03568	0.751316	Tumor	BLCA
TCGA-DK-AA6T-01A	1.32057	2.06588	1.56176	0.674637	2.75941	0.315602	Tumor	BLCA
TCGA-5N-A9KI-01A	0.653806	2.91857	0.583387	0.179662	5.9747	0.0940262	Tumor	BLCA
TCGA-XF-A8HF-01A	0.652312	2.13645	0.705356	0.32661	5.78347	0.101952	Tumor	BLCA
TCGA-UY-A78L-01A	1.09505	2.48402	0.900945	0.830222	5.05468	0	Tumor	BLCA
TCGA-FD-A5C0-01A	0.821728	3.49176	1.03645	0.271984	5.06417	0.0776675	Tumor	BLCA
TCGA-UY-A9PE-01A	1.02355	2.41181	1.59284	0.324513	4.63989	0	Tumor	BLCA
TCGA-K4-A6FZ-01A	0.641781	2.58907	0.178724	0.304388	4.53636	0	Tumor	BLCA
TCGA-DK-A3IK-01A	1.0725	2.59694	1.09609	0.136348	4.99173	0.166574	Tumor	BLCA
TCGA-LC-A66R-01A	0.743723	2.29683	0.298926	1.40622	5.39865	0	Tumor	BLCA
TCGA-GU-A762-01A	0.681939	2.37653	0.488095	1.2648	5.50441	0.0396074	Tumor	BLCA
TCGA-BT-A2LB-11A	0.56265	2.04385	0.127828	3.22182	3.40085	0	Normal	BLCA
TCGA-4Z-AA7O-01A	1.17354	2.71967	0.169556	0.266408	4.79903	0.0582407	Tumor	BLCA
TCGA-DK-A6B5-01A	1.37895	3.75378	0.451139	0.0734324	5.55978	0.0628778	Tumor	BLCA
TCGA-C4-A0F0-01A	0.193803	2.08094	0	0.349423	4.37442	0	Tumor	BLCA
TCGA-UY-A78N-01A	0.979969	2.56877	1.05297	0.0622096	4.49171	0.0823437	Tumor	BLCA
TCGA-G2-AA3F-01A	1.16662	2.37406	0.522602	0.0181742	5.15598	0.0193728	Tumor	BLCA
TCGA-ZF-AA53-01A	0.613	3.52776	0.400783	1.0629	5.81114	0.0272105	Tumor	BLCA
TCGA-LT-A8JT-01A	1.61217	2.80118	1.24682	0.269631	4.91197	0.104518	Tumor	BLCA
TCGA-XF-A8HI-01A	1.60753	2.70866	0.953238	0.334566	4.56731	0.0439397	Tumor	BLCA
TCGA-FJ-A3ZE-01A	2.00569	3.33439	0.781372	0.109427	4.95941	0.209216	Tumor	BLCA
TCGA-FD-A3SM-01A	1.13338	3.23035	0.372544	0.317783	4.87792	0	Tumor	BLCA
TCGA-DK-AA6X-01A	1.52716	2.32603	0.638915	0.924457	5.26186	0.576992	Tumor	BLCA
TCGA-XF-A9SJ-01A	0.79271	2.78235	0.892266	0.616098	5.08557	0.0216918	Tumor	BLCA
TCGA-CF-A7I0-01A	1.21877	2.72585	1.66323	0.414884	4.66628	0.0667783	Tumor	BLCA
TCGA-GD-A3OQ-01A	0.975193	2.86884	0.337183	0.0401637	4.36356	0	Tumor	BLCA
TCGA-CU-A0YO-01A	0.456759	3.20511	0.0870556	0.658102	4.64941	0.0437912	Tumor	BLCA
TCGA-DK-AA71-01A	0.795124	3.01214	0.673693	0.119575	5.1052	0	Tumor	BLCA
TCGA-CF-A9FL-01A	1.39429	2.74164	0.637822	0.109605	4.73826	0.0434967	Tumor	BLCA
TCGA-ZF-AA5N-01A	1.23716	4.03395	0.798534	0.0702047	5.13261	0	Tumor	BLCA
TCGA-UY-A9PF-01A	0.57901	1.93598	0.411924	0.500358	5.05508	0.0350053	Tumor	BLCA
TCGA-UY-A78P-01A	0.917281	3.84308	0.352196	0.719797	5.03106	0.911292	Tumor	BLCA
TCGA-CF-A1HR-01A	0.834413	3.27445	0.669186	0.674459	5.42848	0	Tumor	BLCA
TCGA-DK-A3IN-01A	0.700096	3.31185	0.297152	0.329049	4.92845	0.0346158	Tumor	BLCA
TCGA-UY-A9PH-01A	1.01073	3.01752	1.51568	0.337722	5.43011	0.102155	Tumor	BLCA
TCGA-GD-A76B-01A	1.30934	2.88919	1.57048	0.287308	5.11833	0.0343591	Tumor	BLCA
TCGA-ZF-AA58-01A	0.830762	2.7953	0.458398	0.707573	5.67917	0.0189717	Tumor	BLCA
TCGA-ZF-AA4V-01A	0.517707	1.91286	1.12065	0.18081	5.32101	0.0352897	Tumor	BLCA
TCGA-DK-AA6R-01A	0.670171	3.08422	0.350635	0.155267	4.20868	0	Tumor	BLCA
TCGA-FT-A61P-01A	1.32548	2.87522	0.360675	0.13616	4.47931	0.164305	Tumor	BLCA
TCGA-2F-A9KQ-01A	0.745276	2.4712	1.22984	0.0283006	5.13377	0.827493	Tumor	BLCA
TCGA-K4-A54R-01A	0.838397	2.69498	0.465063	0.0838767	5.33451	0.0516898	Tumor	BLCA
TCGA-FD-A62S-01A	0.855027	2.74979	0.261278	0.409944	5.02532	0.135368	Tumor	BLCA
TCGA-ZF-A9R3-01A	1.5355	3.00632	1.00372	0.196541	5.64813	0.0701201	Tumor	BLCA
TCGA-BT-A42F-01A	0.80555	3.29584	0.586762	5.32824	4.27371	0.410069	Tumor	BLCA
TCGA-K4-A83P-01A	1.23764	2.59138	1.12403	1.93695	5.41232	0.239387	Tumor	BLCA
TCGA-K4-A5RJ-01A	1.31932	4.12103	0.377001	0.272784	6.54347	0.0779117	Tumor	BLCA
TCGA-XF-A9SX-01A	0.767815	2.03822	0.305377	0.305891	4.87052	0	Tumor	BLCA
TCGA-KQ-A41N-01A	0.808254	2.02463	0.569527	0.121684	4.86208	0.322228	Tumor	BLCA
TCGA-DK-A1AE-01A	0.808493	1.90464	0.0845871	0.136812	4.3533	0	Tumor	BLCA
TCGA-DK-A3WX-01A	1.01637	2.64817	0.412072	4.54898	3.76014	0.0359064	Tumor	BLCA
TCGA-DK-A3WW-01A	0.810437	2.46457	0.110711	0.0438802	4.87917	0.0375179	Tumor	BLCA
TCGA-XF-A9SK-01A	1.28217	3.08078	1.03712	0.32816	5.68025	0.0741171	Tumor	BLCA
TCGA-KQ-A41R-01A	1.41387	1.68714	1.73055	0.28231	4.24153	0.337333	Tumor	BLCA
TCGA-CF-A3MG-01A	1.19203	3.07605	0.960287	0.0214508	4.81105	0	Tumor	BLCA
TCGA-CU-A0YR-01A	0.496822	2.09546	0.740928	0.484195	4.88751	0.408322	Tumor	BLCA
TCGA-UY-A78M-01A	0.687984	2.94334	0.516199	0.0186847	5.29977	0.115574	Tumor	BLCA
TCGA-CF-A5UA-01A	1.29302	1.95937	0.203622	0.074264	5.25073	0	Tumor	BLCA
TCGA-ZF-A9RN-01A	0.708021	2.24636	0.668325	0.343461	6.31491	0	Tumor	BLCA
TCGA-4Z-AA81-01A	0.922687	2.31742	0.572288	0.0345509	4.37568	0	Tumor	BLCA
TCGA-E7-A8O8-01A	1.21348	2.11987	1.33924	0.288774	5.08616	0.198742	Tumor	BLCA
TCGA-BL-A0C8-01B	2.09902	2.25598	1.95413	0.265334	3.51575	0.581972	Tumor	BLCA
TCGA-GC-A3RB-01A	0.652496	1.86578	0.105613	0.459804	5.48332	0.0147316	Tumor	BLCA
TCGA-BT-A20O-01A	1.0918	3.02504	0.294726	0.463745	5.723	0.160814	Tumor	BLCA
TCGA-G2-A2ES-01A	0.603144	2.52462	0.119923	0.408406	4.03822	0	Tumor	BLCA
TCGA-DK-AA6P-01A	1.06892	2.24693	0.598622	0.227342	5.54117	0.101386	Tumor	BLCA
TCGA-FD-A43P-01A	1.30821	3.24324	0.969362	0.280065	5.08962	0.0891732	Tumor	BLCA
TCGA-2F-A9KT-01A	1.52877	2.13835	1.56206	0.0888365	5.16539	0	Tumor	BLCA
TCGA-CF-A9FF-01A	0.953004	2.07748	0.908942	0.260174	4.60659	0.0567803	Tumor	BLCA
TCGA-UY-A9PA-01A	1.21399	2.53458	0.161209	0.297342	4.4509	0.0278985	Tumor	BLCA
TCGA-E7-A7DU-01A	1.6859	2.29918	0.963384	0.0814375	4.79531	0.168456	Tumor	BLCA
TCGA-2F-A9KW-01A	0.887746	1.83854	0.539301	0.590194	5.1085	0.0940686	Tumor	BLCA
TCGA-4Z-AA87-01A	1.21819	2.45936	1.43068	0.282709	4.82623	0.216882	Tumor	BLCA
TCGA-GU-A42Q-01A	0.477021	2.55843	0.171213	0.440172	3.96904	0	Tumor	BLCA
TCGA-E7-A97P-01A	0.730547	2.60276	0.558838	0.135158	4.59045	0	Tumor	BLCA
TCGA-XF-AAMG-01A	1.68166	2.04815	1.45783	0.0429937	4.38612	0.0230835	Tumor	BLCA
TCGA-BT-A3PH-01A	0.631802	3.46202	0.42246	0.105511	5.90812	0.0711731	Tumor	BLCA
TCGA-ZF-AA4R-01A	1.23197	2.88382	0.690072	0.169518	4.65929	0.130895	Tumor	BLCA
TCGA-ZF-AA5P-01A	0.628578	2.36946	0.421412	0.729075	4.58473	0.0666394	Tumor	BLCA
TCGA-DK-A3X2-01A	0.413936	2.20659	0.422124	0.0586022	4.41158	0	Tumor	BLCA
TCGA-YC-A8S6-01A	0.758	2.49615	0.954347	1.11665	4.31894	0.116998	Tumor	BLCA
TCGA-K4-A4AB-01B	1.06758	3.2314	0.110471	0.0296987	4.6689	0	Tumor	BLCA
TCGA-GC-A3RC-01A	0.520991	2.97876	0.0645397	1.00089	4.99583	0	Tumor	BLCA
TCGA-BL-A0C8-01A	1.22271	3.2568	1.00581	0.324277	5.31028	0.361406	Tumor	BLCA
TCGA-GU-AATP-01A	1.12291	2.01371	1.956	0	5.53669	0.0287068	Tumor	BLCA
TCGA-CF-A1HS-01A	0.9659	3.21955	0.0665594	0.792597	4.34314	0.07401	Tumor	BLCA
TCGA-ZF-AA4U-01A	0.714944	2.55932	0.20293	0	5.1886	0	Tumor	BLCA
TCGA-GV-A3QF-01A	0.908324	2.5751	1.44618	0.0376222	4.8269	0.0400858	Tumor	BLCA
TCGA-GC-A4ZW-01A	1.00264	2.75725	0.714681	0.0848629	5.31217	0.216019	Tumor	BLCA
TCGA-ZF-A9RD-01A	0.596916	2.02811	0.217844	1.50091	4.74398	0	Tumor	BLCA
TCGA-GU-A766-01A	0.963674	1.89499	0.554328	0.76158	5.45186	0.0184859	Tumor	BLCA
TCGA-G2-A2EF-01A	1.26678	2.79002	0.468673	3.12992	4.38621	0.0369382	Tumor	BLCA
TCGA-FD-A5BY-01A	0.430745	2.51748	0.117565	0.135694	4.69242	0.0399036	Tumor	BLCA
TCGA-CF-A8HX-01A	1.28012	2.2811	2.64105	0.0877342	4.07815	0	Tumor	BLCA
TCGA-GV-A6ZA-01A	1.03684	2.16426	0.549827	0.259188	4.76317	0.29262	Tumor	BLCA
TCGA-DK-A1A5-01A	1.13853	3.69218	0.620592	0.227889	5.23577	0.0281841	Tumor	BLCA
TCGA-4Z-AA7N-01A	1.21631	2.36547	0.154142	2.25466	4.90252	0.152821	Tumor	BLCA
TCGA-GC-A3RD-01A	0.962512	3.21202	0.608457	0.0463463	5.25916	0.11577	Tumor	BLCA
TCGA-G2-A3IE-01A	1.29473	3.16061	0.707828	0.0735078	5.01934	0	Tumor	BLCA
TCGA-FD-A5BZ-01A	1.0016	3.49148	1.16026	0.354687	5.04274	0.0250049	Tumor	BLCA
TCGA-BT-A3PJ-01A	0.61101	2.13315	0.417818	0.525022	5.27951	0.0588137	Tumor	BLCA
TCGA-CU-A72E-01A	0.935533	2.93098	0.541728	2.8071	4.55865	0.0617113	Tumor	BLCA
TCGA-ZF-A9RM-01A	2.05895	3.16938	1.66289	0.0372362	5.49174	0.152545	Tumor	BLCA
TCGA-FD-A6TH-01A	0.840659	2.58662	0.541148	0.206888	4.86599	0.040105	Tumor	BLCA
TCGA-GD-A3OS-01A	1.22565	3.7713	0.543011	0.0973562	4.89356	0	Tumor	BLCA
TCGA-DK-A3IS-01A	1.17617	2.49386	0.759311	0.0812466	4.93814	0.154791	Tumor	BLCA
TCGA-K4-A3WS-01A	1.21804	2.55225	0.626574	0.322453	4.71824	0.0809959	Tumor	BLCA
TCGA-GD-A2C5-11A	1.04173	2.88096	0.491573	1.74209	5.76025	0.158403	Normal	BLCA
TCGA-4Z-AA7R-01A	1.62796	2.33983	1.8261	0.0293489	5.72656	0.0209262	Tumor	BLCA
TCGA-DK-A6B1-01A	1.15467	3.61152	1.2033	0.18516	5.22642	0.307992	Tumor	BLCA
TCGA-GV-A3QI-01A	1.12317	3.11304	0.790499	0.400751	5.89929	0.151171	Tumor	BLCA
TCGA-DK-A6AW-01A	1.04356	2.29861	0.291129	0.0932723	4.90984	0.431028	Tumor	BLCA
TCGA-BT-A20W-01A	1.46258	2.86554	0.934742	0.515778	5.38325	0.137019	Tumor	BLCA
TCGA-DK-A3IU-01A	1.10682	2.58489	0.219848	0.43739	5.23306	0.303397	Tumor	BLCA
TCGA-K4-A5RI-11A	0.532094	2.53485	0.0945371	2.52109	4.62674	0	Normal	BLCA
TCGA-GC-A3YS-01A	1.57254	2.72822	0.630699	0.24003	4.41944	0.0406792	Tumor	BLCA
TCGA-4Z-AA7Q-01A	1.09656	3.25077	0.681636	0.152735	5.75151	0.0261931	Tumor	BLCA
TCGA-LT-A5Z6-01A	1.58195	2.58273	1.8201	0.0671931	5.25478	0.204799	Tumor	BLCA
TCGA-GC-A3I6-01A	1.25009	3.09067	0.202942	0.970715	5.04877	0.144902	Tumor	BLCA
TCGA-E7-A5KF-01A	1.42752	3.05714	0.221677	0	5.04892	0.0551696	Tumor	BLCA
TCGA-DK-A3IM-01A	0.787743	2.03312	0.292441	0.301641	3.98206	0	Tumor	BLCA
TCGA-CF-A47X-01A	1.10008	2.34154	1.75448	0.101556	5.00802	0.184091	Tumor	BLCA
TCGA-BT-A2LA-01A	1.53113	2.82451	0.536413	0.075612	4.29062	0	Tumor	BLCA
TCGA-GV-A3QK-01B	1.0328	2.19226	1.01951	0.453818	4.45666	0.0702509	Tumor	BLCA
TCGA-FD-A6TD-01A	0.984677	2.05913	0.808493	0.788857	5.10922	0.0412572	Tumor	BLCA
TCGA-XF-AAMX-01A	0.930102	2.78253	1.22137	0.200582	6.5866	0.0985488	Tumor	BLCA
TCGA-ZF-A9R5-01A	1.94485	2.73331	1.09166	0.225199	4.81883	0	Tumor	BLCA
TCGA-XF-A8HC-01A	0.80269	3.07989	1.54344	0.0726701	5.10108	0.0773679	Tumor	BLCA
TCGA-ZF-A9RF-01A	1.32477	2.59684	0.789891	0.103682	4.82976	0.0206937	Tumor	BLCA
TCGA-H4-A2HO-01A	1.04291	2.27198	1.40467	0.423311	4.37395	0.763497	Tumor	BLCA
TCGA-BT-A42E-01A	0.948387	2.35063	0.341662	1.25949	3.67496	0.0483004	Tumor	BLCA
TCGA-FD-A5BU-01A	0.591118	3.56942	0.459848	1.11014	4.80325	0	Tumor	BLCA
TCGA-XF-A9T6-01A	1.00013	2.26299	0.310203	0.250942	4.42277	0	Tumor	BLCA
TCGA-ZF-AA4T-01A	0.332935	1.95426	0.819684	0.0227809	5.34921	0	Tumor	BLCA
TCGA-FD-A3B6-01A	1.31991	2.78697	0.470354	0.266603	3.97218	0.139938	Tumor	BLCA
TCGA-4Z-AA80-01A	0.710971	1.92052	0.949264	0.113866	5.02244	0.0250506	Tumor	BLCA
TCGA-GC-A6I3-11A	1.08241	1.99153	0.980223	3.6613	4.63638	0	Normal	BLCA
TCGA-XF-A9SW-01A	0.722829	1.94586	0.186106	0.71749	4.5573	0.0819892	Tumor	BLCA
TCGA-E7-A5KE-01A	1.68255	2.36569	1.32949	0.0857424	5.0622	0.0614761	Tumor	BLCA
TCGA-DK-AA6S-01A	1.31669	2.85385	1.52866	0.0811263	5.75592	0	Tumor	BLCA
TCGA-FD-A5BR-01A	0.844717	2.55651	1.17623	1.21942	5.12954	0.134493	Tumor	BLCA
TCGA-FD-A6TC-01A	1.3235	3.27431	0.97169	0.0692407	4.72487	0.0187868	Tumor	BLCA
TCGA-XF-AAN1-01A	1.4682	2.53286	1.36343	0.0436758	4.72144	0	Tumor	BLCA
TCGA-DK-A3IV-01A	1.44994	2.60308	1.08094	1.81875	5.19359	0.156663	Tumor	BLCA
TCGA-PQ-A6FN-01A	0.542613	3.07099	0.20972	1.03121	4.04872	0.201022	Tumor	BLCA
TCGA-K4-A5RI-01A	0.661289	2.82404	0.125938	0.0715691	5.09834	0.01943	Tumor	BLCA
TCGA-ZF-A9R7-01A	2.23092	2.77684	2.17463	0.741424	4.75196	0.0622435	Tumor	BLCA
TCGA-XF-A9SM-01A	0.684933	2.47435	0.241864	0.696947	5.83851	0.0674702	Tumor	BLCA
TCGA-BL-A13J-11A	0.567981	1.46307	0.0177606	0.560532	3.94181	0	Normal	BLCA
TCGA-FD-A6TE-01A	1.29033	2.84006	0.521441	0.0343325	4.2953	0.193858	Tumor	BLCA
TCGA-XF-AAME-01A	0.791872	2.57642	0.184348	2.77823	4.79192	0.122529	Tumor	BLCA
TCGA-BT-A42C-01A	0.975049	2.86565	0.830904	0.223756	5.33406	0.0300508	Tumor	BLCA
TCGA-CF-A47Y-01A	1.72579	2.57767	0.411726	0.0649342	4.08618	0.0521661	Tumor	BLCA
TCGA-E7-A519-01A	1.76876	0.913559	1.18454	0.300849	4.98155	0	Tumor	BLCA
TCGA-FD-A43Y-01A	0.677504	3.70027	0.235462	0.260258	5.17836	0	Tumor	BLCA
TCGA-BL-A5ZZ-01A	0.641071	2.44682	3.38872	0.544342	4.27593	0.338236	Tumor	BLCA
TCGA-CF-A3MF-01A	1.57591	1.68899	1.84836	0.357853	2.93888	0	Tumor	BLCA
TCGA-FD-A3B8-01A	0.66322	2.50851	0.0648619	1.60175	5.05989	0.0325025	Tumor	BLCA
TCGA-BL-A13I-01B	1.7024	2.21403	0.84993	0.861839	3.52192	0.0327179	Tumor	BLCA
TCGA-DK-A1A7-01A	0.621355	0.930011	0.854387	0.299093	4.27063	0.0156667	Tumor	BLCA
TCGA-DK-A1A6-01A	0.721423	2.36529	0.355507	0.0721066	3.64941	0.0156841	Tumor	BLCA
TCGA-DK-A6B2-01A	1.01371	3.11279	0.857857	0.135487	5.90596	0.194561	Tumor	BLCA
TCGA-DK-AA74-01A	0.714701	2.18396	0.41801	0.806982	5.81097	0.0703304	Tumor	BLCA
TCGA-ZF-AA4N-01A	0.711373	2.87204	0.738295	0.575521	4.51035	0	Tumor	BLCA
TCGA-BT-A0YX-01A	0.588546	3.71727	0.278021	0.550475	4.66057	0.0805747	Tumor	BLCA
TCGA-R3-A69X-01A	0.834535	2.96582	0.107359	0.480104	4.70554	0.123422	Tumor	BLCA
TCGA-XF-AAMW-01A	0.469098	2.5872	0.212899	0.314773	5.06074	0.0337038	Tumor	BLCA
TCGA-C4-A0EZ-01A	1.91572	2.83766	1.85939	1.61646	3.67817	0	Tumor	BLCA
TCGA-E7-A678-01A	1.37296	2.815	0.536001	0.147329	4.86056	0.0804228	Tumor	BLCA
TCGA-G2-A3IB-01A	1.14094	2.86843	0.338528	0.334705	4.35454	0.0156686	Tumor	BLCA
TCGA-BL-A13J-01B	1.84176	1.44129	0.790637	0.0889321	3.2396	0.376667	Tumor	BLCA
TCGA-DK-A3IT-01A	1.39354	2.92817	0.905629	0.126052	5.0083	0.447313	Tumor	BLCA
TCGA-MV-A51V-01A	1.17666	2.72953	1.37063	0.109623	4.918	0.047783	Tumor	BLCA
TCGA-UY-A78O-01A	1.12021	2.8393	1.51667	0.109478	5.46125	0.0646863	Tumor	BLCA
TCGA-FD-A6TK-01A	0.386995	2.20113	0.403327	0.237185	4.97501	0.0176282	Tumor	BLCA
TCGA-4Z-AA83-01A	1.50527	2.96592	1.35059	0.210363	4.80486	0	Tumor	BLCA
TCGA-DK-A2I6-01A	0.506468	2.8644	0.361972	0.0361492	4.60708	0.0129538	Tumor	BLCA
TCGA-XF-AAN4-01A	0.711213	2.06197	0.114555	0.806328	4.40432	0	Tumor	BLCA
TCGA-GD-A3OP-11A	0.849996	2.5887	0.249702	0.858935	4.1774	0.0286582	Normal	BLCA
TCGA-BT-A20R-11A	0.356776	1.31908	0.0334446	1.10591	3.43224	0	Normal	BLCA
TCGA-CF-A27C-01A	1.44025	2.67858	1.50127	0.0228306	4.57022	0.016268	Tumor	BLCA
TCGA-5N-A9KM-01A	0.687515	3.30868	0.125908	0.172636	5.02235	0	Tumor	BLCA
TCGA-BT-A20U-01A	0.990079	2.43763	0.283243	0.203123	4.56992	0.0607303	Tumor	BLCA
TCGA-YC-A9TC-01A	1.27292	2.24548	0.757815	0.0444206	5.16356	0.0191155	Tumor	BLCA
TCGA-E7-A6MD-01A	1.50146	3.58624	0.719874	0.955216	5.67607	0.0225696	Tumor	BLCA
TCGA-K4-A5RH-01A	0.7751	3.09725	0.525922	0.074306	5.37784	0.0108016	Tumor	BLCA
TCGA-XF-AAMH-01A	1.14393	2.25883	1.59842	0.136293	5.27084	0.020182	Tumor	BLCA
TCGA-DK-A1AB-01A	0.685878	2.88039	0.0933603	0.282168	4.78606	0	Tumor	BLCA
TCGA-E5-A4TZ-01A	1.51757	2.76675	0.840532	3.0232	4.60686	0.0299665	Tumor	BLCA
TCGA-FD-A43X-01A	1.69471	2.47012	1.19262	0.0233148	4.94474	0.143056	Tumor	BLCA
TCGA-XF-A9SU-01A	0.34415	2.19537	1.24258	0.197224	5.47978	0.573546	Tumor	BLCA
TCGA-BT-A20N-01A	0.73193	2.00306	0.37988	0.0358961	5.47106	0.170406	Tumor	BLCA
TCGA-BT-A20J-01A	0.55191	2.2238	0.533435	0.0805704	5.48575	0	Tumor	BLCA
TCGA-E7-A4IJ-01A	1.34568	3.36418	1.04562	0.157537	7.54561	0	Tumor	BLCA
TCGA-CF-A47W-01A	1.13568	2.16319	1.07632	0.0699387	4.87985	0.160548	Tumor	BLCA
TCGA-XF-A9SV-01A	1.04835	2.5327	0.972787	0.0754264	5.02976	0.0802974	Tumor	BLCA
TCGA-K4-AAQO-01A	0.804567	2.13456	0.326039	0.428425	4.71097	0	Tumor	BLCA
TCGA-CU-A3YL-01A	1.64945	3.20454	1.69277	0.225629	4.97219	0.0198964	Tumor	BLCA
TCGA-DK-A2I2-01A	0.89339	2.24155	0.0874837	0.161258	4.66957	0	Tumor	BLCA
TCGA-4Z-AA84-01A	0.597311	3.12263	1.05092	0.182012	6.49872	0	Tumor	BLCA
TCGA-DK-A1AF-01A	0.698818	2.73148	0.169345	1.78417	4.6191	1.16187	Tumor	BLCA
TCGA-E5-A4U1-01A	1.88436	1.93956	2.14128	0.316001	4.86107	0.0940866	Tumor	BLCA
TCGA-BT-A20Q-01A	0.939779	2.49551	0.294786	0.0391081	5.03523	0.0416676	Tumor	BLCA
TCGA-ZF-A9R4-01A	1.0994	2.5814	1.37258	0.0786189	4.86992	0.0563294	Tumor	BLCA
TCGA-KQ-A41Q-01A	2.18999	2.3873	1.89974	0.0512913	4.891	0.0438707	Tumor	BLCA
TCGA-E7-A8O7-01A	1.6213	2.57108	0.306609	0.517249	4.62504	0	Tumor	BLCA
TCGA-ZF-AA4W-01A	0.505731	2.87965	0.328781	0.175984	5.05835	0	Tumor	BLCA
TCGA-XF-AAN7-01A	0.964759	2.49475	0.493839	0.076132	4.97106	0.398155	Tumor	BLCA
TCGA-XF-A8HH-01A	1.63801	3.06456	1.33831	0.185194	5.3472	0.023226	Tumor	BLCA
TCGA-FD-A5BX-01A	0.683509	3.10567	0.33363	1.00092	4.316	0	Tumor	BLCA
TCGA-ZF-A9RE-01A	1.11097	2.5849	0.280869	2.66568	4.75725	0.0477188	Tumor	BLCA
TCGA-FT-A3EE-01A	0.674779	2.94216	0.383425	0.0856089	4.60852	0.351762	Tumor	BLCA
TCGA-XF-A9T5-01A	1.009	2.64735	0.206646	3.86719	4.86067	0.177356	Tumor	BLCA
TCGA-XF-AAML-01A	0.946561	2.68146	0.437159	0.0420855	5.14314	0.0300455	Tumor	BLCA
TCGA-BT-A3PK-01A	0.677712	2.7971	0.370072	1.88935	4.4159	0.102553	Tumor	BLCA
TCGA-CF-A3MI-01A	1.07199	1.90639	0.534836	0.236159	4.13278	0	Tumor	BLCA
TCGA-E7-A541-01A	1.27154	3.129	1.23011	0.602706	5.59213	0.197086	Tumor	BLCA
TCGA-ZF-AA54-01A	0.483161	2.53597	0.460957	1.94392	5.77827	0.199279	Tumor	BLCA
TCGA-CU-A0YR-11A	0.695276	2.14889	0.0774742	1.53577	4.45784	0.0916726	Normal	BLCA
TCGA-XF-AAMZ-01A	0.604966	2.40575	1.08575	0.813176	5.60935	0.0383117	Tumor	BLCA
TCGA-CF-A8HY-01A	0.997076	1.86263	0.834395	0.127298	5.32113	0	Tumor	BLCA
TCGA-GV-A3QG-01A	1.77959	2.43425	0.513953	1.02144	5.17964	0.273495	Tumor	BLCA
TCGA-DK-A6B6-01A	0.946488	2.92743	0.273496	0.461033	5.34268	0	Tumor	BLCA
TCGA-DK-A6B0-01A	1.25678	2.46274	0.394641	0.0338	4.66872	0.0360164	Tumor	BLCA
TCGA-E7-A97Q-01A	2.30949	3.11025	0.689075	0.206511	4.23119	1.23735	Tumor	BLCA
TCGA-2F-A9KP-01A	1.09214	2.1511	0.762499	0.197727	4.94759	0.0765377	Tumor	BLCA
TCGA-FD-A62P-01A	0.923956	3.47209	0.80632	0.194729	5.40078	0.141087	Tumor	BLCA
TCGA-XF-A8HG-01A	1.148	3.08523	1.14115	0.0934519	5.39414	0.0226994	Tumor	BLCA
TCGA-4Z-AA86-01A	0.950215	2.4513	0.263822	0.283969	4.67138	0.0158498	Tumor	BLCA
TCGA-GD-A6C6-01A	0.727751	0.987068	1.02464	0.0328195	6.37371	0.177427	Tumor	BLCA
TCGA-G2-A2EJ-01A	0.779864	2.53399	0.115723	0.255835	4.36973	0	Tumor	BLCA
TCGA-UY-A9PD-01A	0.750835	2.82515	0.97551	0	5.27463	0	Tumor	BLCA
TCGA-S5-A6DX-01A	0.945972	1.64833	2.15197	0.439996	5.67318	0.0265169	Tumor	BLCA
TCGA-FD-A3SQ-01A	1.05827	3.17174	0.0385638	0.195038	5.48478	0.147156	Tumor	BLCA
TCGA-DK-AA77-01A	0.712228	2.64577	0.424806	0.0909631	5.49409	0.244975	Tumor	BLCA
TCGA-BL-A13I-01A	1.09642	3.08547	0.776065	0.750342	4.89041	0.0285461	Tumor	BLCA
TCGA-K4-A6MB-01A	1.309	2.62509	0.989342	0.117922	5.46671	0.2546	Tumor	BLCA
TCGA-ZF-AA51-01A	0.863875	2.79419	0.666657	0.464069	4.85922	0.0893453	Tumor	BLCA
TCGA-E7-A7PW-01A	1.63284	3.01676	2.38098	0.152512	4.86561	0.150248	Tumor	BLCA
TCGA-E7-A85H-01A	1.25932	3.5608	0.814604	0.0489206	5.31627	0.28769	Tumor	BLCA
TCGA-GC-A3WC-11A	0.958012	1.99524	0.117305	1.26873	4.48622	0.0447131	Normal	BLCA
TCGA-XF-AAMR-01A	1.05389	2.95989	0.542789	0.596843	5.02266	0	Tumor	BLCA
TCGA-FD-A6TG-01A	0.772352	2.88782	0.417748	0.236749	5.85891	0.279706	Tumor	BLCA
TCGA-2F-A9KO-01A	1.03467	2.30909	0.323545	0.37892	5.19202	0.169367	Tumor	BLCA
TCGA-HQ-A5ND-01A	1.37426	3.40141	0.222933	0.058115	4.53312	0	Tumor	BLCA
TCGA-G2-AA3B-01A	1.42491	2.27279	1.63819	0.115992	4.70027	0.144091	Tumor	BLCA
TCGA-PQ-A6FI-01A	0.699838	2.48735	0.106112	0.33472	3.91236	0	Tumor	BLCA
TCGA-C4-A0F7-01A	0.485407	1.28334	0.317817	0.272272	4.10264	0.0719209	Tumor	BLCA
TCGA-FD-A5BS-01A	0.844709	2.63637	0.354044	0.570096	6.41761	0.57624	Tumor	BLCA
TCGA-GV-A3JX-01A	1.42665	2.58602	0.765629	2.04127	5.00125	0.30683	Tumor	BLCA
TCGA-XF-AAMT-01A	1.21885	3.20596	0.201284	0.120294	5.78154	0.0865394	Tumor	BLCA
TCGA-XF-A9T8-01A	0.522792	3.04341	0.462892	1.92115	5.55613	0.181277	Tumor	BLCA
TCGA-BT-A20W-11A	0.584014	2.63891	0.111681	1.65059	4.59563	0	Normal	BLCA
TCGA-4Z-AA7S-01A	1.52142	2.83627	1.43259	0.253002	5.18471	0	Tumor	BLCA
TCGA-XF-A9SH-01A	1.01239	2.63457	0.202092	0.49318	5.03729	0.200387	Tumor	BLCA
TCGA-DK-A1AG-01A	1.97927	2.4202	0.469164	0.0721594	4.98119	0.0516686	Tumor	BLCA
TCGA-GD-A3OQ-11A	1.47595	2.57786	0.211207	0.995438	4.4269	0	Normal	BLCA
TCGA-2F-A9KR-01A	1.52753	2.51269	0.374467	0.296211	5.05109	0.105614	Tumor	BLCA
TCGA-DK-AA6U-01A	1.60899	3.26714	1.54807	0.142808	5.10536	0.0694491	Tumor	BLCA
TCGA-C4-A0F6-01A	0.636994	2.86889	0.316181	0.365335	4.49753	0.295888	Tumor	BLCA
TCGA-K4-A3WU-01B	1.6894	3.02795	1.30443	1.26042	4.83661	1.24675	Tumor	BLCA
TCGA-CU-A0YN-01A	1.157	2.50647	0.289924	0.532823	3.94165	0	Tumor	BLCA
TCGA-FJ-A871-01A	1.07341	2.31963	0.551845	0.168637	4.4295	0.0358862	Tumor	BLCA
TCGA-G2-A2EC-01A	1.22856	3.70149	0.394424	0.724147	5.25491	0	Tumor	BLCA
TCGA-FD-A5BV-01A	1.10188	2.66969	0.365618	0.57774	4.76049	0	Tumor	BLCA
TCGA-E7-A7XN-01A	0.735143	2.24807	0.149552	0.195761	5.008	0	Tumor	BLCA
TCGA-GU-A764-01A	1.09246	3.03412	0.59457	0.602294	5.58705	0.0366075	Tumor	BLCA
TCGA-XF-AAN8-01A	0.32434	2.46462	0.166047	1.27738	4.45512	0.267814	Tumor	BLCA
TCGA-XF-A9SZ-01A	0.573021	3.6466	0.681839	0.0459898	5.9488	0.024704	Tumor	BLCA
TCGA-GU-AATO-01A	0.873665	2.81138	0.788054	0.141914	5.20733	0.0923953	Tumor	BLCA
TCGA-ZF-A9RC-01A	1.48302	2.16295	1.79675	0.0624232	4.87827	0.0269581	Tumor	BLCA
TCGA-ZF-A9R0-01A	1.41048	2.73816	1.99733	0.0841759	4.73858	0.0518761	Tumor	BLCA
TCGA-KQ-A41P-01A	0.70567	2.28119	0.427248	0.132361	5.01147	0.755302	Tumor	BLCA
TCGA-4Z-AA7W-01A	1.08766	2.42413	0.973521	0.271765	4.90146	0.0252893	Tumor	BLCA
TCGA-HQ-A5NE-01A	0.982902	3.69994	0.470653	0.382176	5.33414	0	Tumor	BLCA
TCGA-CU-A3KJ-01A	1.06723	2.75061	0.463768	6.56719	4.9724	0	Tumor	BLCA
TCGA-UY-A8OC-01A	0.518386	3.09947	0.570363	0.0622327	5.06143	0.0662712	Tumor	BLCA
TCGA-E7-A3Y1-01A	1.72036	2.83886	0.686843	0.357303	3.9589	0.178326	Tumor	BLCA
TCGA-XF-AAN5-01A	0.815044	2.20798	0.0582159	0.156778	4.52176	0.0434902	Tumor	BLCA
TCGA-G2-AA3D-01A	1.86838	3.35516	1.46933	0.161991	5.75027	0.151703	Tumor	BLCA
TCGA-GU-A42R-01A	0.119907	2.69466	0.716735	0.103992	4.84299	0	Tumor	BLCA
TCGA-XF-A9SI-01A	1.04159	2.91389	0.392963	2.27514	6.20242	0.107775	Tumor	BLCA
TCGA-GV-A3JZ-01A	1.01994	1.871	0.657214	0.0454295	4.9254	0.06865	Tumor	BLCA
TCGA-E9-A1NI-01A	1.6197	2.33965	0.887176	0.122758	4.86088	0.230987	Tumor	BRCA
TCGA-A1-A0SP-01A	0.728642	2.15357	0.213937	0.327279	5.71826	0.154644	Tumor	BRCA
TCGA-BH-A1EU-11A	1.34719	2.16045	0.17953	1.73439	4.16416	0.109415	Normal	BRCA
TCGA-A8-A06X-01A	0.786143	2.47891	0.521658	0.237616	6.92331	0.0471269	Tumor	BRCA
TCGA-E2-A14T-01A	2.18247	2.30378	0.584243	0.45109	5.23032	0.598147	Tumor	BRCA
TCGA-AC-A8OS-01A	1.32826	2.94044	1.24452	0.86595	4.93055	0.954133	Tumor	BRCA
TCGA-A8-A09K-01A	1.80819	2.93787	1.70861	0.160397	5.5542	0.078247	Tumor	BRCA
TCGA-OL-A5RY-01A	1.11558	2.67048	0.486408	1.6267	5.28725	0.158192	Tumor	BRCA
TCGA-BH-A0DG-01A	1.14854	2.68541	0.342016	0.852764	4.97061	0.972393	Tumor	BRCA
TCGA-B6-A0I9-01A	2.10957	2.76228	0.95731	0.0778756	4.20211	0.0694102	Tumor	BRCA
TCGA-A2-A0CP-01A	1.77225	2.27807	0.712294	0.274271	5.00951	0	Tumor	BRCA
TCGA-A8-A07S-01A	0.845325	2.99815	0.376123	0.10815	5.62951	0.0625001	Tumor	BRCA
TCGA-AO-A12H-01A	0.990072	2.52162	0.539826	0.239677	5.76107	3.71398	Tumor	BRCA
TCGA-BH-A203-11A	1.22114	2.17522	0.0830231	0.771454	4.09211	0.121745	Normal	BRCA
TCGA-AR-A1AU-01A	1.48845	2.46811	0.209322	0.328537	5.24428	0.143323	Tumor	BRCA
TCGA-D8-A1X9-01A	1.84638	3.40097	0.532705	0.0590198	5.1526	0.112319	Tumor	BRCA
TCGA-E9-A1RH-11A	0.891702	2.34562	0.12686	1.26271	4.30727	0	Normal	BRCA
TCGA-A8-A07R-01A	0.373015	1.8362	0.0520716	0	4.78173	0	Tumor	BRCA
TCGA-AO-A12C-01A	1.34477	2.34782	0.390249	0.0484902	4.88761	0.196363	Tumor	BRCA
TCGA-V7-A7HQ-01A	1.86403	1.67332	3.00437	0.254647	5.85723	0.199399	Tumor	BRCA
TCGA-A2-A1FZ-01A	1.05137	2.51295	0.603752	0.339328	5.48941	1.95714	Tumor	BRCA
TCGA-AR-A251-01A	0.900818	1.79001	0.408649	0.182851	4.68315	0.149094	Tumor	BRCA
TCGA-BH-A18J-11A	1.39752	2.49023	0.415342	2.15232	4.55035	0.412078	Normal	BRCA
TCGA-EW-A1PF-01A	1.46311	2.95411	0.785876	0.396234	5.50342	0.0911732	Tumor	BRCA
TCGA-BH-A18T-01A	0.824613	2.02912	0.29615	0.1072	6.07268	0.068171	Tumor	BRCA
TCGA-AR-A24S-01A	1.45752	2.24492	0.535312	0.285399	5.97471	0.737943	Tumor	BRCA
TCGA-AN-A041-01A	1.67996	2.7233	0.588648	0.0504103	4.68367	0.15544	Tumor	BRCA
TCGA-BH-A0E0-11A	1.14821	2.29252	0.123102	1.16852	5.19091	0.127875	Normal	BRCA
TCGA-E2-A1LL-01A	1.05527	4.44073	0.198713	0.109923	4.92493	0.0241571	Tumor	BRCA
TCGA-E2-A1IJ-01A	1.79551	2.87353	0.915149	1.63759	5.22062	0.180877	Tumor	BRCA
TCGA-AR-A24O-01A	0.842829	2.42189	0.27261	1.03542	4.79365	0.200697	Tumor	BRCA
TCGA-XX-A899-01A	1.54308	2.52291	0.823334	0.740168	4.86407	0.209109	Tumor	BRCA
TCGA-D8-A1XK-01A	0.7824	2.57418	0.309567	0.0183937	6.12441	0.0260835	Tumor	BRCA
TCGA-AC-A5XS-01A	1.6002	2.29814	1.13528	0.488116	5.95157	0.452077	Tumor	BRCA
TCGA-BH-A18L-01A	0.980972	2.34253	0.447592	0.392184	4.65206	0.0138633	Tumor	BRCA
TCGA-OL-A66J-01A	1.73478	2.74011	1.5492	0.865577	5.22311	0.716225	Tumor	BRCA
TCGA-PE-A5DD-01A	1.75577	2.7476	1.38683	0.464847	5.19559	1.22372	Tumor	BRCA
TCGA-AN-A04D-01A	1.18485	2.0413	0.310693	0.0665891	5.93379	0.0131534	Tumor	BRCA
TCGA-4H-AAAK-01A	1.38811	2.28571	0.701267	0.26525	6.07868	0.0588851	Tumor	BRCA
TCGA-E9-A5FL-01A	1.19524	1.57207	1.30868	0.356238	4.5468	0	Tumor	BRCA
TCGA-E9-A24A-01A	1.23575	2.69019	0.6304	0.13912	5.2472	1.18016	Tumor	BRCA
TCGA-BH-A1FM-01A	0.440352	1.8659	0.0481191	0.027027	4.17195	0.735931	Tumor	BRCA
TCGA-A8-A07C-01A	1.07325	1.69778	0.0767593	0.242221	5.30991	0.0908307	Tumor	BRCA
TCGA-AR-A24Q-01A	0.721651	1.99783	0.270548	0.214958	4.65421	0.0636256	Tumor	BRCA
TCGA-AR-A2LE-01A	1.03023	2.25383	0.216205	0.225297	4.65545	0.310712	Tumor	BRCA
TCGA-AR-A0U4-01A	0.535212	2.74544	0.176984	0.18113	6.08426	0.110879	Tumor	BRCA
TCGA-GM-A2DN-01A	1.18907	2.5019	0.359158	0.936153	5.17273	0.53172	Tumor	BRCA
TCGA-A7-A13D-01A	0.919896	2.89494	0.159781	0.0306863	4.79678	0.0379963	Tumor	BRCA
TCGA-D8-A1JG-01B	2.04788	2.55055	0.941645	0.311644	5.81243	0.984594	Tumor	BRCA
TCGA-E2-A570-01A	1.68409	3.34369	1.02021	0.294763	4.86281	0	Tumor	BRCA
TCGA-A2-A04Q-01A	0.956623	1.94682	0.27795	0.497063	5.50056	0.0333625	Tumor	BRCA
TCGA-A7-A6VV-01A	1.30406	2.60502	0.156364	0.18687	5.40411	0.212653	Tumor	BRCA
TCGA-E2-A1IG-01A	1.45237	2.91926	0.98613	0.0497104	5.71888	0.0355158	Tumor	BRCA
TCGA-E9-A1N6-01A	1.18712	2.54686	0.485147	0.00953796	5.76356	3.49993	Tumor	BRCA
TCGA-E9-A1NC-01A	0.748605	3.13708	0.256865	0.31124	5.71769	0.0375008	Tumor	BRCA
TCGA-A7-A3IZ-01A	2.03397	2.45896	1.04022	0.250172	5.4033	0.109059	Tumor	BRCA
TCGA-BH-A18U-11A	1.20371	2.48239	0.286073	1.3507	4.64092	0.22745	Normal	BRCA
TCGA-AN-A0AK-01A	1.00947	2.658	0.519924	0.057026	5.4907	0.558714	Tumor	BRCA
TCGA-D8-A1JM-01A	1.07923	2.33728	0.550572	0.168095	5.63432	0	Tumor	BRCA
TCGA-OL-A5S0-01A	0.575905	3.31819	0.391589	0.466978	5.33284	0.0228775	Tumor	BRCA
TCGA-A8-A06Z-01A	0.741153	2.77976	0.837089	0.132936	5.6068	0.121979	Tumor	BRCA
TCGA-AQ-A54O-01A	1.88241	2.65577	2.37807	0.0820507	5.98959	0.192377	Tumor	BRCA
TCGA-E2-A15S-01A	1.88184	2.58555	0.829913	0.405237	4.41801	0.113579	Tumor	BRCA
TCGA-BH-A1ET-11B	1.40441	2.44805	0.321061	2.52739	4.25739	0.0240937	Normal	BRCA
TCGA-BH-A18R-11A	1.39949	2.30691	0.257073	2.08537	4.2118	0.411346	Normal	BRCA
TCGA-EW-A423-01A	2.20354	2.87835	2.27931	0.112138	5.87382	0.572164	Tumor	BRCA
TCGA-C8-A273-01A	0.90254	3.1059	0.751521	0.0551667	5.65551	0.0651391	Tumor	BRCA
TCGA-OL-A5RV-01A	2.08708	3.20916	1.28902	0.244643	5.12711	0.448841	Tumor	BRCA
TCGA-AC-A2FM-01A	2.50082	2.85554	1.25797	0.353722	5.16895	0.392947	Tumor	BRCA
TCGA-AO-A0JM-01A	0.848924	2.65512	0.45494	0.0793201	5.09303	1.67999	Tumor	BRCA
TCGA-BH-A0DP-01A	1.11311	2.65029	0.19725	0.480967	5.21211	0.201288	Tumor	BRCA
TCGA-A2-A25E-01A	0.793175	2.44455	0.510193	0.334774	4.93013	0.157836	Tumor	BRCA
TCGA-B6-A2IU-01A	1.48743	2.66839	1.49952	0.454725	5.49486	0.103109	Tumor	BRCA
TCGA-BH-A18P-01A	1.53273	2.35247	0.453081	0.115995	4.68923	0	Tumor	BRCA
TCGA-E9-A22B-01A	1.03833	2.46179	0.149694	0.169062	4.35089	1.11323	Tumor	BRCA
TCGA-A2-A0SW-01A	1.30782	3.40824	1.24442	0.227881	5.77913	0.629869	Tumor	BRCA
TCGA-E2-A107-01A	1.83194	2.68907	0.904059	0.462798	5.58205	0.529159	Tumor	BRCA
TCGA-E2-A1B6-01A	1.66359	1.97904	0.533284	2.33782	5.51328	0.111508	Tumor	BRCA
TCGA-D8-A1XW-01A	1.3037	3.04601	0.570999	0.65199	4.77437	0.378453	Tumor	BRCA
TCGA-A7-A0DC-01A	1.76488	2.12681	0.594486	0.0349345	5.10245	0.422007	Tumor	BRCA
TCGA-EW-A6SD-01A	1.84475	2.85252	0.838085	0.160995	5.31378	0.279797	Tumor	BRCA
TCGA-AO-A0J3-01A	1.81352	2.13423	0.81684	0.148578	5.28565	0.0236464	Tumor	BRCA
TCGA-A7-A0DC-11A	0.965897	2.46119	0.255118	2.05606	4.8009	0.269486	Normal	BRCA
TCGA-AN-A03X-01A	1.15656	2.51773	0.196187	0.286839	5.01909	0.0257996	Tumor	BRCA
TCGA-BH-A1FM-11B	1.29097	2.32771	0.200238	1.37942	4.2059	0.365884	Normal	BRCA
TCGA-A8-A099-01A	1.05641	1.92203	0.331046	0.192683	5.77595	0.0141133	Tumor	BRCA
TCGA-E2-A14Z-01A	1.90908	2.54599	1.48242	0.598849	5.5747	0.0780105	Tumor	BRCA
TCGA-AR-A5QP-01A	1.63119	2.45545	1.32076	0.665806	5.22025	0.039124	Tumor	BRCA
TCGA-AC-A62X-01A	1.13941	2.08256	1.07214	0.200035	5.71159	0.0189428	Tumor	BRCA
TCGA-BH-A42V-01A	1.57624	2.5678	1.72035	1.11932	5.38368	0.0548744	Tumor	BRCA
TCGA-B6-A0RS-01A	1.01619	1.81366	0.275699	0.208716	5.39128	0.814617	Tumor	BRCA
TCGA-D8-A1JL-01A	0.786075	2.41017	0.10476	0.395004	4.61076	0.045424	Tumor	BRCA
TCGA-BH-A0DZ-01A	0.851627	2.34404	0.264346	0.316451	5.39859	0.458004	Tumor	BRCA
TCGA-A8-A06Y-01A	1.16504	2.52979	0.228311	0.0446706	5.75865	0.0569203	Tumor	BRCA
TCGA-B6-A1KC-01B	1.15158	2.30258	0.157815	0.0774118	5.1661	0.0885557	Tumor	BRCA
TCGA-C8-A135-01A	0.831708	2.17825	0.266968	0.19115	4.54757	0.275244	Tumor	BRCA
TCGA-5L-AAT1-01A	1.25543	2.88473	0.648164	0.506697	6.08121	0.315871	Tumor	BRCA
TCGA-AR-A24R-01A	1.37862	3.54614	0.50765	0.292508	5.36019	0.266415	Tumor	BRCA
TCGA-S3-AA0Z-01A	0.91	2.58924	0.96673	0.325846	5.89624	0.0479264	Tumor	BRCA
TCGA-D8-A1J8-01A	0.889065	2.12993	0.188921	0.128652	4.92185	2.10144	Tumor	BRCA
TCGA-A2-A0ER-01A	0.884583	1.94599	0.154132	0.225982	5.49421	0.167993	Tumor	BRCA
TCGA-E9-A1ND-01A	0.914358	2.94014	0.151993	0.325868	5.09468	0.021499	Tumor	BRCA
TCGA-GI-A2C8-11A	0.254461	3.92799	0.023359	0.217927	2.37779	0.0794491	Normal	BRCA
TCGA-A2-A1G1-01A	0.641897	2.66841	1.07076	0.246176	4.77813	0.0116366	Tumor	BRCA
TCGA-A2-A0SU-01A	0.77146	2.34119	0.573483	0.801885	5.25449	0	Tumor	BRCA
TCGA-E2-A1LB-01A	1.48595	2.27834	0.378758	0.167464	5.82411	0.465335	Tumor	BRCA
TCGA-E9-A1RD-01A	1.32706	2.6582	0.566304	0.0333349	5.20852	2.73158	Tumor	BRCA
TCGA-OL-A6VQ-01A	1.19499	2.68107	0.713464	0.819128	5.04617	0.139975	Tumor	BRCA
TCGA-AQ-A04J-01A	1.0899	2.29392	0.276267	1.10136	4.88431	0.18027	Tumor	BRCA
TCGA-AQ-A1H3-01A	1.43346	2.8878	0.297755	0.864255	4.846	0.174954	Tumor	BRCA
TCGA-A2-A259-01A	1.22842	2.61404	0.918409	0.636466	4.85837	0.0705447	Tumor	BRCA
TCGA-WT-AB44-01A	1.77538	2.12787	1.77917	0.185077	4.14039	0.941639	Tumor	BRCA
TCGA-B6-A0IN-01A	1.30347	2.63521	0.170828	0.871621	4.95365	1.87181	Tumor	BRCA
TCGA-E9-A1R3-01A	1.52698	2.62843	0.549816	0.120599	4.99676	1.7794	Tumor	BRCA
TCGA-A8-A086-01A	1.80148	2.22719	0.350225	0.0248991	5.05241	0.0654495	Tumor	BRCA
TCGA-AC-A3BB-01A	1.21848	3.05614	0.636367	0.928583	5.1611	0.273728	Tumor	BRCA
TCGA-AC-A2QI-01A	1.80914	2.99527	0.93774	0.54997	5.73859	0.0634861	Tumor	BRCA
TCGA-BH-A1F5-01A	1.38493	1.9933	0.577422	0.1204	4.47712	0.396887	Tumor	BRCA
TCGA-AC-A3HN-01A	1.24085	2.54271	0.712777	1.00068	5.21989	0.199286	Tumor	BRCA
TCGA-BH-A1FG-01A	0.833853	2.08142	0.886986	0.165167	5.47532	1.35758	Tumor	BRCA
TCGA-BH-A0DV-01A	0.618284	2.59019	0.144515	0.933358	5.02334	0.882807	Tumor	BRCA
TCGA-UL-AAZ6-01A	1.74581	3.29856	1.82684	0.00762628	5.71117	0.0322534	Tumor	BRCA
TCGA-AR-A255-01A	0.934514	2.5406	0.537495	0.405091	5.32116	0.126323	Tumor	BRCA
TCGA-LD-A7W6-01A	1.63887	2.89999	1.53599	0.514766	6.71182	0.0382899	Tumor	BRCA
TCGA-AR-A24Z-01A	1.07745	2.45716	0.612329	0.083603	6.37995	0.361128	Tumor	BRCA
TCGA-A1-A0SO-01A	0.668932	2.77287	0.21613	0.100422	4.54513	0.0410013	Tumor	BRCA
TCGA-A2-A3XS-01A	1.29271	3.24312	1.11359	0.383817	5.68453	0.130091	Tumor	BRCA
TCGA-D8-A1X6-01A	1.76781	2.76513	1.40958	0.0589136	5.56478	0.0627413	Tumor	BRCA
TCGA-BH-A0HF-01A	0.516596	2.53185	0.0261633	0.588615	4.79867	1.00468	Tumor	BRCA
TCGA-A7-A3J0-01A	0.953457	3.26826	0.296396	0.260296	6.18298	0.168682	Tumor	BRCA
TCGA-AC-A23C-01A	1.3453	2.37714	0.320221	0.410443	4.84079	1.88985	Tumor	BRCA
TCGA-LL-A442-01A	1.37995	3.29068	1.38567	0.224806	5.38228	0.228053	Tumor	BRCA
TCGA-S3-A6ZH-01A	1.78409	3.49546	1.88612	0.305838	5.18255	0.0447115	Tumor	BRCA
TCGA-AC-A8OR-01A	1.36485	2.90607	0.561027	0.0354065	5.76923	0.0252605	Tumor	BRCA
TCGA-AR-A1AX-01A	1.67123	2.66996	0.661822	0.909945	5.35218	0.116524	Tumor	BRCA
TCGA-D8-A1XO-01A	0.838322	2.08837	0.234076	0.215208	5.4432	0	Tumor	BRCA
TCGA-E9-A1R2-01A	1.1259	2.44438	0.669135	0.235454	5.28167	0.0640157	Tumor	BRCA
TCGA-D8-A27M-01A	1.26638	3.73797	0.321568	0.459235	5.44094	0.0670648	Tumor	BRCA
TCGA-AN-A0FY-01A	2.43391	2.81801	1.32009	0.0797412	5.29184	0.119786	Tumor	BRCA
TCGA-BH-A0DX-01A	1.29178	2.78765	0.521667	1.1706	5.33204	3.80338	Tumor	BRCA
TCGA-EW-A1IY-01A	0.475451	1.81962	0.0670373	0.376672	4.42608	0.388811	Tumor	BRCA
TCGA-A2-A04N-01A	2.13003	2.40923	1.25676	0.148271	5.20192	0.117764	Tumor	BRCA
TCGA-A2-A0YF-01A	1.20746	2.60387	0.435668	0.111683	5.13046	0.454633	Tumor	BRCA
TCGA-PE-A5DE-01A	1.29272	2.73627	0.989852	0.551174	5.4053	0.528808	Tumor	BRCA
TCGA-BH-A1FN-11A	0.813575	2.25247	0.0601131	1.97195	4.16164	0.112786	Normal	BRCA
TCGA-EW-A1J5-01A	1.44004	2.79661	0.545183	0.400585	5.26628	0.127893	Tumor	BRCA
TCGA-AO-A0JE-01A	1.71322	2.3773	0.804161	0.262018	5.36797	1.10063	Tumor	BRCA
TCGA-BH-A1FN-01A	1.55756	2.18066	0.442837	0.0306363	4.59413	0.0645727	Tumor	BRCA
TCGA-BH-A18V-01A	0.914803	2.65586	0.175483	0.22066	5.46311	0	Tumor	BRCA
TCGA-AC-A23H-11A	0.78038	2.13395	0.0281605	1.57888	4.09532	0.184891	Normal	BRCA
TCGA-BH-A0BF-01A	1.28491	2.72669	0.541069	0.468756	5.68158	0.221736	Tumor	BRCA
TCGA-B6-A409-01A	0.752874	2.80002	0.945501	0.218584	4.84329	0.013915	Tumor	BRCA
TCGA-A2-A0CL-01A	1.46776	2.60224	0.367207	1.17986	5.3677	0.0181671	Tumor	BRCA
TCGA-A2-A0CO-01A	1.59296	2.97536	1.20933	1.15418	5.04903	0.125692	Tumor	BRCA
TCGA-E2-A158-11A	0.946058	2.65239	0.0807875	1.61506	4.40349	0.118509	Normal	BRCA
TCGA-AC-A3QP-01A	1.56768	2.7131	1.60952	0.628283	5.49927	0.0656504	Tumor	BRCA
TCGA-AC-A2QJ-01A	0.732457	2.42109	1.20499	1.68342	4.68387	0.284858	Tumor	BRCA
TCGA-B6-A0RM-01A	1.86613	3.06035	1.94845	0.174953	5.61494	0.0646473	Tumor	BRCA
TCGA-D8-A1JS-01A	0.734434	2.83362	0.99719	0.0961694	6.05562	0.0447487	Tumor	BRCA
TCGA-E9-A1RB-11A	1.05188	2.13535	0.237071	1.64356	4.51913	0.0501839	Normal	BRCA
TCGA-A7-A26J-01A	1.20542	2.11853	0.605071	0.184439	5.18466	0.308102	Tumor	BRCA
TCGA-A7-A13H-01A	2.04679	2.75445	1.44182	1.46787	5.51073	1.05067	Tumor	BRCA
TCGA-AO-A126-01A	1.33304	2.14342	0.582886	1.5428	4.9556	0.682995	Tumor	BRCA
TCGA-BH-A6R8-01A	1.99524	3.22266	1.58937	0.139533	6.15896	0.827928	Tumor	BRCA
TCGA-A7-A0DB-01C	2.509	1.34626	0.508797	0.109147	3.19461	0.0592229	Tumor	BRCA
TCGA-AC-A3TM-01A	1.68148	1.52529	1.78748	0.184248	5.70596	0.018928	Tumor	BRCA
TCGA-AR-A0TQ-01A	1.31663	2.7423	1.84406	0.721378	4.89699	0.32104	Tumor	BRCA
TCGA-GM-A2DH-01A	1.44461	2.84067	0.521291	0.497409	5.5781	0.414377	Tumor	BRCA
TCGA-B6-A0RI-01A	1.54169	2.94806	0.543433	0.020449	5.53514	0.0289894	Tumor	BRCA
TCGA-A2-A1G0-01A	1.52434	2.35473	0.469011	0.632347	4.86846	0.208813	Tumor	BRCA
TCGA-A2-A1FX-01A	1.65144	2.70661	1.10388	0.356061	6.05562	0.0262619	Tumor	BRCA
TCGA-A7-A26G-01A	0.751537	2.31125	0.169074	0.366091	5.87571	0.235261	Tumor	BRCA
TCGA-E2-A1LI-01A	1.34224	2.00867	0.410856	0.226625	4.86576	0.1132	Tumor	BRCA
TCGA-A8-A08P-01A	1.5694	2.44076	0.606206	0.328178	5.53042	0.131372	Tumor	BRCA
TCGA-E2-A1IN-01A	1.69987	2.50808	0.555177	0.0321848	4.72553	0.282756	Tumor	BRCA
TCGA-BH-A0HA-01A	1.02268	2.56105	0.321469	0.520951	5.58275	0.575581	Tumor	BRCA
TCGA-AO-A1KR-01A	0.863928	1.72994	0.739217	0	4.08222	0	Tumor	BRCA
TCGA-3C-AALK-01A	1.43384	2.89582	1.04221	0.937746	5.1587	1.05019	Tumor	BRCA
TCGA-BH-A0BV-01A	1.12693	3.24377	0.688954	0.413389	5.55683	1.24173	Tumor	BRCA
TCGA-E2-A1IH-01A	1.36017	1.92235	0.444045	1.04305	4.83181	0.890026	Tumor	BRCA
TCGA-XX-A89A-01A	1.61147	2.71989	0.920994	0.662202	4.85416	0.330027	Tumor	BRCA
TCGA-E9-A1RH-01A	1.34055	2.06323	0.136353	0.10219	5.10519	0.052187	Tumor	BRCA
TCGA-A8-A085-01A	1.31613	2.66257	0.667599	0.0141303	5.51103	0.097575	Tumor	BRCA
TCGA-E9-A1N3-01A	1.03934	2.24649	0.810922	0.13364	5.4251	1.77555	Tumor	BRCA
TCGA-BH-A1EW-11B	1.3706	2.40705	0.501022	1.06968	4.97088	0.112131	Normal	BRCA
TCGA-D8-A13Y-01A	3.03613	3.09346	0.881527	0.197569	5.16978	0.104504	Tumor	BRCA
TCGA-AO-A0JB-01A	0.610932	1.32515	0.985421	0.262586	4.79575	0.317876	Tumor	BRCA
TCGA-AC-A6IV-01A	1.90866	3.0901	1.27005	2.5486	5.40326	0.696438	Tumor	BRCA
TCGA-A8-A09M-01A	1.85802	2.64616	1.42858	0.211109	5.75351	0.259439	Tumor	BRCA
TCGA-BH-A0GY-01A	1.23356	2.24995	0.485712	0.25414	4.58506	0.0403074	Tumor	BRCA
TCGA-AR-A2LL-01A	1.86667	2.49504	1.04866	0.35534	5.31942	1.17722	Tumor	BRCA
TCGA-BH-A208-01A	0.6394	2.46647	0.134915	0.127925	5.0018	0.260332	Tumor	BRCA
TCGA-E2-A15I-11A	1.00617	1.98572	0.077363	1.43409	4.03681	0.131633	Normal	BRCA
TCGA-EW-A1PE-01A	1.07516	2.67034	0.622723	0.254355	5.81293	0.688668	Tumor	BRCA
TCGA-AO-A125-01A	2.13018	2.28348	1.52609	0.111173	4.91978	0	Tumor	BRCA
TCGA-E2-A1B1-01A	0.945274	2.36742	0.101205	1.19722	5.3132	2.37851	Tumor	BRCA
TCGA-BH-A0C0-01A	0.919945	3.3558	0.608614	0.604543	5.88427	0.678127	Tumor	BRCA
TCGA-A7-A26I-01B	2.70916	3.11807	0.988128	0.121034	3.98703	0	Tumor	BRCA
TCGA-AO-A0JJ-01A	0.554063	2.88146	0.28225	0.978605	5.44239	0.192521	Tumor	BRCA
TCGA-AR-A2LH-01A	1.0102	2.62881	0.266753	0.873922	5.23146	0.169039	Tumor	BRCA
TCGA-A2-A3XW-01A	1.00708	3.30098	2.59929	1.58798	5.53218	0.0145894	Tumor	BRCA
TCGA-AR-A0TS-01A	1.79689	3.81598	0.349818	2.67253	4.87814	0.121931	Tumor	BRCA
TCGA-BH-A0AV-01A	0.612764	2.03616	0.037039	0.195346	4.40309	0.0547186	Tumor	BRCA
TCGA-A8-A07B-01A	1.39862	1.70191	0.35314	0.110484	5.2287	0.395336	Tumor	BRCA
TCGA-LL-A73Z-01A	1.28945	2.5126	0.686137	0.954446	5.29648	0.140387	Tumor	BRCA
TCGA-BH-A0BA-11A	1.09345	2.48099	0.0865665	2.04429	4.66954	0	Normal	BRCA
TCGA-BH-A0B3-11B	1.44147	2.37584	0.453152	2.34871	4.79601	0.0956784	Normal	BRCA
TCGA-B6-A402-01A	1.16166	2.43209	0.223352	0.0780238	4.53847	0.0169985	Tumor	BRCA
TCGA-AR-A0TT-01A	1.81207	2.72135	0.823694	0.323935	5.53285	0.208419	Tumor	BRCA
TCGA-EW-A6SB-01A	0.65492	2.387	0.54593	0.29746	5.95272	0	Tumor	BRCA
TCGA-AC-A2FB-01A	0.886741	2.80531	0.182949	1.6041	4.94252	0.239854	Tumor	BRCA
TCGA-AC-A62V-01A	2.90331	2.6536	2.15136	0.202025	5.44347	0.0351458	Tumor	BRCA
TCGA-D8-A1XQ-01A	0.918994	2.70658	0.303998	0.0765488	5.97709	0.133368	Tumor	BRCA
TCGA-BH-A0DD-01A	1.60006	2.78987	0.707834	0.130915	5.11988	0.146985	Tumor	BRCA
TCGA-Z7-A8R6-01A	1.93137	2.59957	1.62304	0.0791739	5.17635	0.224588	Tumor	BRCA
TCGA-OL-A5DA-01A	1.52396	2.25461	1.42598	0.101742	5.41436	0.0795237	Tumor	BRCA
TCGA-WT-AB41-01A	2.34233	1.82161	1.0562	1.09351	6.60399	0.128315	Tumor	BRCA
TCGA-E2-A1LA-01A	1.28355	2.15096	0.584691	0.293648	5.6988	0.553549	Tumor	BRCA
TCGA-AR-A24N-01A	0.824227	2.61754	0.496816	0.0721961	5.08762	0.026079	Tumor	BRCA
TCGA-E9-A3QA-01A	1.50288	3.1059	0.248571	0.702352	5.59807	0.0702659	Tumor	BRCA
TCGA-BH-A0DO-11A	0.983113	1.98522	0.124475	1.60865	4.52202	0.181351	Normal	BRCA
TCGA-E2-A15J-01A	1.03488	2.43091	0.455336	0.0148488	4.88989	0.0158293	Tumor	BRCA
TCGA-LL-A73Y-01A	0.650069	2.43232	0.495121	0.796385	5.06528	0.352353	Tumor	BRCA
TCGA-A2-A4RY-01A	1.64754	2.75276	0.975699	0.954809	4.90273	0.0485283	Tumor	BRCA
TCGA-D8-A1XU-01A	0.949808	2.40952	0.64467	0.0977671	5.38161	0.0320041	Tumor	BRCA
TCGA-E2-A1LS-11A	0.916132	1.80166	0.0680658	1.75973	3.98254	0.0756806	Normal	BRCA
TCGA-AN-A0FJ-01A	0.605002	1.78187	0.0377836	0.289159	5.08835	0.0281757	Tumor	BRCA
TCGA-BH-A0DK-01A	0.761137	2.70507	0.368913	0.529148	5.20739	0.305968	Tumor	BRCA
TCGA-B6-A0IJ-01A	0.53794	2.49788	0.440975	0.177235	5.72473	0.0249213	Tumor	BRCA
TCGA-LL-A7SZ-01A	2.13816	2.8208	2.51754	0.196285	5.95109	0.367505	Tumor	BRCA
TCGA-C8-A26Y-01A	1.65315	3.62444	0.69395	0.304777	5.4645	1.1139	Tumor	BRCA
TCGA-GI-A2C9-11A	1.13578	2.50803	0.183283	1.47981	4.3646	0.0982531	Normal	BRCA
TCGA-BH-A0BQ-11A	1.07248	2.20167	0.16808	1.3543	4.15901	0.343054	Normal	BRCA
TCGA-A8-A06R-01A	2.55799	2.7228	1.61108	0	5.09358	0.032757	Tumor	BRCA
TCGA-AO-A128-01A	1.10272	2.76016	0.360285	0.358219	6.60502	0.182155	Tumor	BRCA
TCGA-E2-A1BC-01A	1.15425	2.05976	0.573777	0.606687	5.24873	0.552591	Tumor	BRCA
TCGA-A7-A0CE-11A	1.22176	2.60395	0.460226	1.20168	5.14659	0.110754	Normal	BRCA
TCGA-B6-A0I6-01A	1.20471	2.45686	0.392128	0.00978056	5.43298	0.19545	Tumor	BRCA
TCGA-BH-A1ET-01A	1.22843	2.36002	0.584231	0.251811	5.10947	0.80672	Tumor	BRCA
TCGA-A2-A04V-01A	1.95719	2.61068	0.691543	0.421984	4.78846	0.0318146	Tumor	BRCA
TCGA-A7-A2KD-01A	1.84114	3.72751	0.706918	0.259738	5.70111	1.09547	Tumor	BRCA
TCGA-A7-A0CE-01A	0.87175	2.88705	0.174012	0.206479	5.62029	0	Tumor	BRCA
TCGA-D8-A1JE-01A	0.431491	2.66243	0.105709	0.0291046	4.97407	2.63388	Tumor	BRCA
TCGA-B6-A0WX-01A	1.46912	1.9028	0.706554	0.309446	5.77417	0.112598	Tumor	BRCA
TCGA-A7-A4SB-01A	2.21853	2.68981	2.45747	0.609837	4.92895	0.124972	Tumor	BRCA
TCGA-EW-A1J1-01A	1.25443	2.56721	0.827245	0.192936	5.37766	1.21744	Tumor	BRCA
TCGA-A2-A0YM-01A	1.55411	2.07898	0.212098	0.15105	5.06847	0.0555223	Tumor	BRCA
TCGA-A8-A0A4-01A	1.32247	2.72238	0.887456	0.912328	5.37338	0.202954	Tumor	BRCA
TCGA-A2-A0EM-01A	0.851118	2.54021	0.185861	0.152896	5.5951	0	Tumor	BRCA
TCGA-AR-A24X-01A	1.57534	2.28308	0.22499	0.258265	4.83895	0.0239288	Tumor	BRCA
TCGA-C8-A132-01A	1.4777	2.54804	0.631991	0.473786	4.33671	1.62237	Tumor	BRCA
TCGA-AN-A049-01A	1.19459	2.44001	0.813516	0.226129	5.50613	0.01921	Tumor	BRCA
TCGA-A2-A0SY-01A	0.750983	2.48483	0.143757	0.623294	4.74147	0.142521	Tumor	BRCA
TCGA-B6-A0RU-01A	0.855572	2.14069	0.289743	0.969223	5.73507	0.050221	Tumor	BRCA
TCGA-AR-A0TX-01A	1.94916	2.59285	0.867958	0.425465	5.32444	0.610844	Tumor	BRCA
TCGA-BH-A0HQ-01A	1.81742	2.48709	0.500966	0.178264	5.38889	0.403359	Tumor	BRCA
TCGA-E2-A15C-01A	2.42585	2.5287	1.24451	0.265306	5.04671	0.126097	Tumor	BRCA
TCGA-AQ-A54N-01A	1.23505	2.36168	0.497363	0.17454	4.20795	0	Tumor	BRCA
TCGA-A8-A07I-01A	1.38299	2.4166	0.462729	0.0467615	4.80427	0.521678	Tumor	BRCA
TCGA-B6-A1KI-01A	1.13939	2.64197	0.745023	0.366584	5.6073	0.167874	Tumor	BRCA
TCGA-B6-A0RH-01A	0.641377	2.24938	0.272039	0.0374465	5.71508	0.0267214	Tumor	BRCA
TCGA-BH-A5IZ-01A	0.731204	2.45271	0.197414	0.260647	6.00495	0.0387829	Tumor	BRCA
TCGA-AN-A0XU-01A	1.40265	2.3468	0.85774	0.217207	5.41364	0.0160379	Tumor	BRCA
TCGA-LD-A74U-01A	1.36462	2.74386	1.26277	0.782132	4.99914	0.579877	Tumor	BRCA
TCGA-B6-A401-01A	1.92691	3.26813	2.1324	0.471387	5.4805	0.146706	Tumor	BRCA
TCGA-PL-A8LV-01A	0.889752	3.406	0.19919	0.157465	4.75499	0	Tumor	BRCA
TCGA-BH-A0C3-11A	1.38345	2.31495	0.420317	1.21265	4.37406	0.0725367	Normal	BRCA
TCGA-BH-A0BR-01A	0.849487	2.82575	0.26182	0.17971	5.94543	1.06566	Tumor	BRCA
TCGA-A8-A07G-01A	1.00909	2.58911	0.133957	0.16033	4.89507	0.398556	Tumor	BRCA
TCGA-A2-A0EN-01A	1.16955	2.32513	0.315445	0.718497	5.02024	0.426706	Tumor	BRCA
TCGA-OK-A5Q2-01A	1.72643	2.82139	1.12929	0.855281	4.94466	0.17853	Tumor	BRCA
TCGA-A8-A084-01A	1.38433	2.97885	0.964061	0	5.55864	2.6154	Tumor	BRCA
TCGA-BH-A0DS-01A	1.40113	2.36137	0.23141	0.328821	5.0846	0.427413	Tumor	BRCA
TCGA-A8-A09I-01A	1.01126	2.9289	0.787683	0.0663826	4.76881	0.454524	Tumor	BRCA
TCGA-GM-A3XL-01A	0.950229	2.49477	0.672876	0.182345	6.2863	0.0601437	Tumor	BRCA
TCGA-W8-A86G-01A	2.15768	2.72775	2.47468	0.708345	5.12029	0.150624	Tumor	BRCA
TCGA-AO-A12F-01A	1.45671	1.98602	1.13915	0.656715	4.19524	0.0148297	Tumor	BRCA
TCGA-BH-A0HK-01A	0.586413	2.3393	0.106007	1.08129	4.23759	0.243876	Tumor	BRCA
TCGA-A8-A06Q-01A	1.3716	2.52154	0.755167	0.0759646	5.15689	0.186973	Tumor	BRCA
TCGA-BH-A42U-01A	1.46852	2.42567	1.18931	1.58138	5.14772	0.19028	Tumor	BRCA
TCGA-BH-A0BW-11A	1.72373	2.66873	0.199724	2.05527	4.68741	1.40887	Normal	BRCA
TCGA-AQ-A04L-01B	0.691831	2.5076	0.647995	0.0151231	5.65251	0.643272	Tumor	BRCA
TCGA-AR-A1AO-01A	0.941421	2.82049	0.235898	1.51686	5.5168	3.59226	Tumor	BRCA
TCGA-Z7-A8R5-01A	1.14001	2.17809	1.20199	1.10574	5.30256	1.13255	Tumor	BRCA
TCGA-B6-A0I1-01A	1.53947	3.15428	1.06095	0.0387187	7.29529	0.0138825	Tumor	BRCA
TCGA-E9-A1N6-11A	1.10692	2.49369	0.134987	1.44138	4.67401	0.99379	Normal	BRCA
TCGA-EW-A1PA-01A	1.75884	3.09049	0.900438	0.616302	5.38013	0.0849099	Tumor	BRCA
TCGA-BH-A0W4-01A	1.14263	2.27512	0.375924	0.254162	5.12293	0.102652	Tumor	BRCA
TCGA-A2-A3XZ-01A	2.10731	2.52215	0.907109	1.35976	4.54414	0.107262	Tumor	BRCA
TCGA-A7-A26H-01A	1.28942	2.60061	0.811774	0.230302	4.86531	0.326293	Tumor	BRCA
TCGA-E2-A1B0-01A	0.886882	2.29991	0.421117	0.14876	5.3021	0.0166144	Tumor	BRCA
TCGA-BH-A1EU-01A	1.31075	2.55411	0.423587	1.64811	4.67808	0.470428	Tumor	BRCA
TCGA-AC-A23H-01A	0.795242	2.19515	0.135947	0.00619642	5.49335	0.308807	Tumor	BRCA
TCGA-EW-A1P4-01A	0.731659	3.95071	0.115775	0.110245	5.06134	0.0637306	Tumor	BRCA
TCGA-E2-A10E-01A	1.31605	2.42637	0.256796	0.141441	5.1209	0.0425854	Tumor	BRCA
TCGA-EW-A1P0-01A	1.32808	2.30087	0.239781	0.189059	5.09366	0.103878	Tumor	BRCA
TCGA-EW-A6S9-01A	1.73414	3.31341	0.752099	0.0312902	4.55277	0.756811	Tumor	BRCA
TCGA-A2-A25B-01A	1.0142	2.94272	0.414729	0.0570945	4.57491	0.293966	Tumor	BRCA
TCGA-LL-A6FR-01A	0.660515	1.52736	0.442252	0.0216962	5.70856	0.0231252	Tumor	BRCA
TCGA-AR-A5QM-01A	1.68591	2.58387	1.83445	0.556847	5.37281	0.493325	Tumor	BRCA
TCGA-BH-A18Q-11A	1.44511	2.27707	0.330384	2.14006	4.22137	0.103507	Normal	BRCA
TCGA-EW-A1P5-01A	1.91151	2.99932	0.801499	0.0744424	5.61241	0.248818	Tumor	BRCA
TCGA-E2-A14O-01A	1.3052	2.68649	0.842031	0.0811606	6.00623	0.238203	Tumor	BRCA
TCGA-AN-A0AR-01A	1.29051	2.37747	1.02412	0.43592	5.90193	0.103235	Tumor	BRCA
TCGA-E9-A22D-01A	1.30845	2.97728	0.944112	0.772954	5.59948	0.257073	Tumor	BRCA
TCGA-A2-A0CS-01A	0.829415	2.63539	0.29204	0.486597	5.56076	1.80493	Tumor	BRCA
TCGA-E2-A1IF-01A	1.62139	2.16384	1.37627	0.49168	5.55443	2.50318	Tumor	BRCA
TCGA-BH-A0DZ-11A	0.983621	2.2097	0.2371	1.16665	5.06151	0.223659	Normal	BRCA
TCGA-E2-A1IE-01A	1.54571	2.42513	0.757255	0.477005	5.30251	0.0584871	Tumor	BRCA
TCGA-BH-A0BW-01A	1.3394	3.55783	0.0915176	0.206702	5.37426	0.0346905	Tumor	BRCA
TCGA-E2-A1AZ-01A	1.20037	2.27725	0.13828	0.736409	4.81084	0.0701719	Tumor	BRCA
TCGA-D8-A27N-01A	1.28495	2.56273	0.784274	0.131233	5.35922	1.90564	Tumor	BRCA
TCGA-A2-A0CT-01A	1.15356	2.43771	0.359366	0.306342	5.79488	0.0594189	Tumor	BRCA
TCGA-A8-A09R-01A	1.72404	2.68592	0.456308	0.0429942	5.38188	0.54679	Tumor	BRCA
TCGA-B6-A0RE-01A	0.560848	2.39518	0.30154	0.0968475	5.22699	0.0524466	Tumor	BRCA
TCGA-E9-A249-01A	1.99437	2.18441	0.550583	0.0628545	5.79389	0.107964	Tumor	BRCA
TCGA-E2-A1B5-01A	0.954117	2.39564	0.150737	2.61196	5.15001	0.218734	Tumor	BRCA
TCGA-A2-A25A-01A	0.981844	2.56042	0.252042	1.19287	4.94688	0.214205	Tumor	BRCA
TCGA-AO-A03O-01A	1.1112	3.11783	0.848835	0.382134	5.00684	0.160406	Tumor	BRCA
TCGA-E9-A22A-01A	1.16677	2.64947	0.352756	0.203408	5.3457	0.101194	Tumor	BRCA
TCGA-BH-A1EV-11A	1.06398	2.18203	0.0795671	1.54696	4.01332	0.0648451	Normal	BRCA
TCGA-BH-A0GZ-01A	1.02433	2.00669	0.674667	0.130195	5.49065	0.111792	Tumor	BRCA
TCGA-BH-A1FD-01A	0.8499	2.40291	0.604871	0.0247251	5.90647	0.0522309	Tumor	BRCA
TCGA-A1-A0SH-01A	1.06196	2.5366	0.107149	0.264835	4.99549	0.131591	Tumor	BRCA
TCGA-E2-A10A-01A	1.7983	2.57416	0.96057	0.0511066	5.46526	0.0620483	Tumor	BRCA
TCGA-B6-A0IO-01A	1.43743	2.72615	0.797924	0.134074	5.1075	0.880275	Tumor	BRCA
TCGA-BH-A1FR-01A	1.45442	2.84242	1.11447	0.368617	5.79079	1.96657	Tumor	BRCA
TCGA-D8-A143-01A	1.12787	2.79241	0.107436	0.260108	5.38849	0.173369	Tumor	BRCA
TCGA-AO-A03R-01A	0.925022	2.20441	0.477081	0.421555	4.83604	0.0252469	Tumor	BRCA
TCGA-BH-A0DQ-11A	1.26825	2.29527	0.348702	0.96553	4.96137	0.175447	Normal	BRCA
TCGA-BH-A0BV-11A	1.30101	2.13664	0.259153	1.43814	4.61358	0.159628	Normal	BRCA
TCGA-BH-A0E0-01A	0.738028	1.07078	0.945534	0.600504	4.53234	0.311333	Tumor	BRCA
TCGA-A8-A0AD-01A	1.16714	2.24913	0.594122	0.138172	5.7611	0.0605637	Tumor	BRCA
TCGA-GM-A2DI-01A	1.32876	2.64447	0.655611	0.908478	5.14664	0.146513	Tumor	BRCA
TCGA-E9-A6HE-01A	1.54774	2.14816	1.19485	0.263362	5.56779	0.0651272	Tumor	BRCA
TCGA-BH-A0B3-01A	0.709213	2.52187	0.066883	0.150868	5.37827	0	Tumor	BRCA
TCGA-AR-A0TU-01A	0.659917	1.43774	0.386342	0.0856251	5.74709	0.0613913	Tumor	BRCA
TCGA-LQ-A4E4-01A	2.10907	2.7172	1.99557	0.266361	5.34289	0.986496	Tumor	BRCA
TCGA-PL-A8LY-01A	1.07257	2.42842	0.732437	0.842042	4.91701	0.0962574	Tumor	BRCA
TCGA-BH-A1FU-01A	0.976803	1.98468	0.286618	0.513603	4.62738	0.149124	Tumor	BRCA
TCGA-A8-A09D-01A	1.28382	1.98734	0.32197	1.00852	5.35597	0.677587	Tumor	BRCA
TCGA-B6-A3ZX-01A	1.65635	2.45073	0.354204	2.34281	5.32633	0.0319025	Tumor	BRCA
TCGA-A7-A5ZV-01A	1.15712	3.143	0.769421	0.395811	6.82241	0.0267326	Tumor	BRCA
TCGA-BH-A0AY-01A	1.20087	2.58967	0.503724	0.395072	4.88838	0.0538468	Tumor	BRCA
TCGA-A7-A4SD-01A	1.06315	3.05089	0.192255	0.146644	5.45148	0	Tumor	BRCA
TCGA-AO-A03L-01A	1.4885	2.43964	0.317868	0.203613	5.511	0.242688	Tumor	BRCA
TCGA-A2-A0EX-01A	0.576904	2.61496	0.0847039	0.513458	4.91776	0.124177	Tumor	BRCA
TCGA-GM-A2DM-01A	0.930797	2.56032	0.465876	0.0242575	5.54118	2.92941	Tumor	BRCA
TCGA-BH-A0DO-01B	1.05478	2.10443	0.38103	0.735754	5.31595	0.0502885	Tumor	BRCA
TCGA-HN-A2OB-01A	1.46985	2.46082	0.651184	0.237455	4.95061	0.0402124	Tumor	BRCA
TCGA-A2-A0CM-01A	1.12727	2.88098	0.505491	0.146645	4.67525	0.0643839	Tumor	BRCA
TCGA-A2-A4S0-01A	1.41738	3.49917	1.34986	0.230263	6.31831	0.0741289	Tumor	BRCA
TCGA-BH-A0H9-01A	1.22618	2.61246	1.34841	0.166673	5.69063	0.364366	Tumor	BRCA
TCGA-B6-A0IP-01A	1.57971	2.71223	0.246114	0.266757	5.31512	0.0263508	Tumor	BRCA
TCGA-C8-A12X-01A	1.09854	2.89509	0.451833	0.223011	6.6851	0.0993711	Tumor	BRCA
TCGA-AN-A0AL-01A	0.646061	2.1304	0.221622	0.245081	5.43047	0.819775	Tumor	BRCA
TCGA-LD-A9QF-01A	1.21389	3.24782	0.722724	0.955887	5.23793	1.25887	Tumor	BRCA
TCGA-BH-A0DG-11A	1.40635	2.27491	0.282877	1.57422	4.5788	0.133034	Normal	BRCA
TCGA-E2-A152-01A	2.00878	2.88323	0.354394	0.0244946	5.126	0.328427	Tumor	BRCA
TCGA-BH-A1FE-06A	0.838982	2.0022	0.0962738	1.61509	5.16137	0.219246	Tumor	BRCA
TCGA-BH-A18N-01A	2.42225	2.58074	1.46723	0.0387362	5.65576	0.0166506	Tumor	BRCA
TCGA-C8-A1HN-01A	2.07617	2.52219	0.961968	0.0296667	5.55607	0.0378557	Tumor	BRCA
TCGA-AN-A0FK-01A	0.881732	2.62467	0.479266	0.0383291	5.96391	0.141905	Tumor	BRCA
TCGA-B6-A0IE-01A	1.13403	2.43989	0.643514	0.547683	5.31575	0.110469	Tumor	BRCA
TCGA-B6-A400-01A	1.21088	3.18852	0.354298	0.26101	5.29211	0.151001	Tumor	BRCA
TCGA-GM-A2DB-01A	1.87232	2.85285	1.10982	1.29563	4.8939	1.34564	Tumor	BRCA
TCGA-AC-A2FK-01A	1.44331	2.34339	0.259652	0.9417	4.73175	0.583318	Tumor	BRCA
TCGA-BH-A0HU-01A	2.034	2.34122	0.920393	0.139021	6.13396	0.242921	Tumor	BRCA
TCGA-D8-A140-01A	1.17381	2.37242	0.397001	0.705559	5.72878	3.2544	Tumor	BRCA
TCGA-A7-A0CD-01A	0.833501	2.3344	0.345381	0.238478	5.75065	1.77078	Tumor	BRCA
TCGA-D8-A1JF-01A	1.30604	2.45293	0.143872	0.128807	5.55943	0.510292	Tumor	BRCA
TCGA-BH-A208-11A	1.13653	1.97971	0.215162	1.18591	4.29992	0.056369	Normal	BRCA
TCGA-A2-A4S1-01A	1.1498	4.09707	0.927505	0.413897	4.96072	0.131942	Tumor	BRCA
TCGA-5T-A9QA-01A	2.3489	2.51985	1.00885	0.0391219	5.63008	0.0279215	Tumor	BRCA
TCGA-AR-A2LK-01A	1.94119	2.71365	0.783513	0.0910806	5.01348	0.212687	Tumor	BRCA
TCGA-AR-A1AH-01A	0.818469	2.11335	0.321465	0.0449238	3.84304	0.139058	Tumor	BRCA
TCGA-AR-A254-01A	1.20419	2.14148	0.385296	0.176813	4.65021	0.12789	Tumor	BRCA
TCGA-E2-A1IO-01A	1.87063	2.19946	1.33917	0.391448	4.93318	0.0657837	Tumor	BRCA
TCGA-S3-A6ZF-01A	1.61759	3.9779	0.522563	0.353883	4.79396	0.278046	Tumor	BRCA
TCGA-B6-A0IB-01A	1.34523	2.65207	0.821773	0.29864	5.39337	0.388722	Tumor	BRCA
TCGA-A8-A07J-01A	1.32736	3.08714	0.205777	1.45315	5.73556	1.53557	Tumor	BRCA
TCGA-AN-A0FV-01A	2.75116	2.95265	0.334359	0.0296641	4.72789	0.314629	Tumor	BRCA
TCGA-AN-A0XP-01A	0.974307	2.20219	0.269578	0.0789569	5.63089	0.921728	Tumor	BRCA
TCGA-A8-A08Z-01A	1.62667	2.39796	0.470127	0.105661	5.06932	0.643231	Tumor	BRCA
TCGA-E9-A226-01A	1.3635	2.15857	0.527353	0.0875347	4.91809	0	Tumor	BRCA
TCGA-AR-A1AW-01A	1.6335	2.49836	0.570824	1.06583	5.90571	0.30089	Tumor	BRCA
TCGA-GI-A2C9-01A	0.871294	3.25587	0.556215	0.095595	6.39736	0.170228	Tumor	BRCA
TCGA-EW-A6SA-01A	3.25395	3.0342	2.27023	0.127954	5.25122	0.0149416	Tumor	BRCA
TCGA-E9-A1NG-01A	0.75804	2.33423	0.231326	0.0877265	4.42767	0	Tumor	BRCA
TCGA-A8-A07L-01A	1.75657	2.36254	0.491514	0.076429	4.43033	0.0166439	Tumor	BRCA
TCGA-E2-A15L-01A	1.04064	2.49733	0.304822	0.0138485	5.31938	0.608401	Tumor	BRCA
TCGA-D8-A1JI-01A	0.985051	3.00372	0.775596	0.220807	5.9638	0.019441	Tumor	BRCA
TCGA-GM-A2DO-01A	2.44212	2.92186	1.87776	0.537105	5.23618	0.17411	Tumor	BRCA
TCGA-EW-A1P6-01A	2.07376	2.69107	1.50149	0.234628	5.37769	0.141073	Tumor	BRCA
TCGA-BH-A1F0-11B	1.06186	2.36055	0.124131	2.12998	4.39909	0.0407099	Normal	BRCA
TCGA-AR-A1AI-01A	0.775558	2.26656	0.147826	0.126066	5.21353	0.185833	Tumor	BRCA
TCGA-AR-A0U3-01A	1.02388	2.87157	0.435146	0.121186	5.12999	0.201025	Tumor	BRCA
TCGA-A2-A0ES-01A	1.29543	2.29618	0.216174	0.67546	4.85013	0.282446	Tumor	BRCA
TCGA-BH-A18K-11A	1.84644	2.27555	0.544985	2.53038	4.57122	0.203664	Normal	BRCA
TCGA-A8-A06P-01A	1.46074	2.45345	0.755432	0.180094	4.98059	0.178438	Tumor	BRCA
TCGA-S3-AA12-01A	2.17193	3.03692	1.88722	0.0810082	5.68413	0.049903	Tumor	BRCA
TCGA-E9-A1N5-11A	1.22747	2.30207	0.220909	0.793999	4.52918	0.152897	Normal	BRCA
TCGA-E9-A3Q9-01A	1.38089	2.86563	1.34419	1.77112	5.54578	1.91087	Tumor	BRCA
TCGA-BH-A0HX-01A	1.29103	2.91992	0.282528	1.07954	5.0564	0.260483	Tumor	BRCA
TCGA-AC-A3W7-01A	1.68642	2.90649	1.68372	0.29884	5.2146	0.63206	Tumor	BRCA
TCGA-AO-A124-01A	1.25698	2.03363	0.497466	0.111271	5.68655	0	Tumor	BRCA
TCGA-AC-A5XU-01A	2.37941	3.14914	1.28343	0.04357	5.89115	0	Tumor	BRCA
TCGA-LL-A6FQ-01A	1.44655	2.25959	2.14597	0.198811	5.33956	0.462733	Tumor	BRCA
TCGA-AQ-A1H2-01A	0.925782	2.94255	1.0676	0.0288618	5.94242	0.41809	Tumor	BRCA
TCGA-BH-A0DQ-01A	1.33081	3.22244	0.694222	0.486685	5.49801	0.279686	Tumor	BRCA
TCGA-E2-A106-01A	1.61157	2.90462	1.47551	0.180363	5.60778	0.169886	Tumor	BRCA
TCGA-A2-A25F-01A	0.741186	2.24522	0.0534127	1.39081	5.42381	0.347451	Tumor	BRCA
TCGA-AN-A0AT-01A	1.32346	2.73202	0.345291	0.0416861	5.04232	0.0128292	Tumor	BRCA
TCGA-D8-A27T-01A	1.19886	2.66695	0.5845	0.700213	5.22417	0.513186	Tumor	BRCA
TCGA-A2-A04X-01A	0.964614	2.51682	0.461686	0.433465	5.54558	2.19915	Tumor	BRCA
TCGA-A2-A3XT-01A	1.16731	3.40039	0.895262	0.246297	6.01064	0.531526	Tumor	BRCA
TCGA-AR-A0TY-01A	1.54086	2.73253	0.797199	0.207521	6.11982	0.054942	Tumor	BRCA
TCGA-A2-A0YG-01A	1.48465	2.2105	0.351751	0.08511	5.54771	0.216621	Tumor	BRCA
TCGA-B6-A0WZ-01A	1.32724	3.2705	0.81308	0.446467	5.4386	0.204602	Tumor	BRCA
TCGA-A7-A5ZX-01A	1.39778	2.36816	0.919851	0.281746	5.12694	0.0944288	Tumor	BRCA
TCGA-AC-A23G-01A	0.58293	2.87947	0.297266	0.90082	5.23832	0.278074	Tumor	BRCA
TCGA-GM-A2DA-01A	2.22503	2.21639	1.79207	0.314182	4.92378	0.547217	Tumor	BRCA
TCGA-B6-A0X1-01A	0.852553	3.10315	0.307051	1.23174	6.05913	0	Tumor	BRCA
TCGA-AO-A12E-01A	1.3996	2.35127	1.00473	0.738227	5.22534	0.123084	Tumor	BRCA
TCGA-AR-A250-01A	1.90159	2.42049	0.6902	0.00564832	4.78444	0.434447	Tumor	BRCA
TCGA-A8-A06O-01A	1.78537	2.59005	0.717604	0.218784	5.11062	0.399787	Tumor	BRCA
TCGA-AO-A12G-01A	0.535115	2.56584	0.331286	0.393473	5.31876	0.0312906	Tumor	BRCA
TCGA-A7-A3IY-01A	0.82889	2.84496	0.34006	0.124304	5.6292	0.432913	Tumor	BRCA
TCGA-E2-A1IG-11A	1.1184	2.50039	0.0872439	1.57378	4.50752	0.353877	Normal	BRCA
TCGA-BH-A1EY-01A	0.793444	2.63644	0.667137	0.302329	5.22132	0.538064	Tumor	BRCA
TCGA-A8-A079-01A	1.57893	2.57254	0.899011	0.0471481	5.55616	0.0431558	Tumor	BRCA
TCGA-AO-A03P-01A	1.13474	2.63957	0.621241	0.158468	5.27491	0.131245	Tumor	BRCA
TCGA-E2-A572-01A	0.834171	1.8362	1.51403	0.567348	6.25749	5.25617	Tumor	BRCA
TCGA-A2-A0YH-01A	1.63027	2.70228	0.786315	0.242059	5.13821	0.242876	Tumor	BRCA
TCGA-E2-A15G-01A	2.08788	2.98279	1.42244	0.212195	5.0352	0.0417841	Tumor	BRCA
TCGA-C8-A12M-01A	2.12722	2.24686	1.56451	0.227197	4.79945	0	Tumor	BRCA
TCGA-AR-A0TV-01A	0.908136	2.84389	1.13242	0.304594	5.88026	0.481736	Tumor	BRCA
TCGA-A7-A13G-01B	2.6613	2.49849	1.17512	0.376635	4.25503	0.182639	Tumor	BRCA
TCGA-A8-A07E-01A	0.618298	2.11337	0.173527	0.641476	4.90197	0.70778	Tumor	BRCA
TCGA-E9-A1N9-01A	1.3189	2.47701	0.372331	0.236156	6.01829	1.43666	Tumor	BRCA
TCGA-BH-A0H3-01A	1.24424	2.30665	0.187626	0.638387	4.90222	0.283059	Tumor	BRCA
TCGA-AR-A1AY-01A	0.820269	1.75651	0.340564	0.0942062	5.90036	0.0341961	Tumor	BRCA
TCGA-A2-A0D4-01A	2.06338	2.80992	1.06604	0.322193	4.0574	0.0917806	Tumor	BRCA
TCGA-E9-A5UO-01A	1.67412	2.87389	1.38836	0.174868	6.31302	0	Tumor	BRCA
TCGA-GM-A2DL-01A	0.87352	2.53136	0.441212	0.305921	5.16883	0.307891	Tumor	BRCA
TCGA-EW-A1PD-01A	1.89587	2.2134	0.707716	0.187203	5.54277	1.47147	Tumor	BRCA
TCGA-A1-A0SI-01A	1.28842	2.71355	0.471883	0.166318	5.81234	0.655476	Tumor	BRCA
TCGA-A2-A0CV-01A	1.04691	2.63688	0.345069	1.05263	5.20149	0.0517398	Tumor	BRCA
TCGA-E2-A15E-06A	1.5038	2.66478	1.14715	0.816245	5.31268	0.134357	Tumor	BRCA
TCGA-AO-A12B-01A	0.821278	2.08602	0.416742	0.0710324	7.03392	0.0570887	Tumor	BRCA
TCGA-B6-A408-01A	1.47964	3.39414	1.99445	0.373651	5.33506	0.0646833	Tumor	BRCA
TCGA-OL-A5D7-01A	1.15062	2.08574	1.49509	0.286668	4.8328	0.0661002	Tumor	BRCA
TCGA-A2-A0EW-01A	0.995593	2.38297	0.393287	1.13475	5.10129	0.188715	Tumor	BRCA
TCGA-A2-A0T4-01A	1.0953	2.68651	0.182807	1.04082	5.33985	0.666274	Tumor	BRCA
TCGA-C8-A131-01A	1.89453	2.01862	0.442003	0.284297	5.46778	0.550466	Tumor	BRCA
TCGA-BH-A1EN-01A	1.7172	2.93295	0.116332	0.118412	3.83138	0.0808099	Tumor	BRCA
TCGA-D8-A3Z5-01A	2.3614	2.8041	2.27636	0.869473	5.33698	0.0500157	Tumor	BRCA
TCGA-E9-A247-01A	2.51453	2.56451	1.51386	0.123265	5.10498	0.18036	Tumor	BRCA
TCGA-C8-A12Q-01A	1.39792	3.26966	0.687663	0.208105	5.54034	0.716313	Tumor	BRCA
TCGA-E2-A1BD-01A	2.03938	2.49818	1.45229	0.438822	5.51934	0.0570411	Tumor	BRCA
TCGA-E9-A1RI-01A	1.31372	2.34633	0.560832	0.0666817	4.60956	1.02084	Tumor	BRCA
TCGA-BH-A18M-11A	1.54241	2.48577	0.230016	2.65394	4.58016	0.0604925	Normal	BRCA
TCGA-E2-A105-01A	1.89352	3.77863	1.1707	0.0494653	5.37368	0.239609	Tumor	BRCA
TCGA-D8-A1JK-01A	1.91329	3.00147	0.470361	0.102829	5.78558	2.27893	Tumor	BRCA
TCGA-E9-A1N9-11A	1.26814	2.44204	0.35206	1.94518	4.76717	1.5251	Normal	BRCA
TCGA-BH-A0BJ-01A	0.605535	2.47138	0.193683	0.39126	5.81869	1.03149	Tumor	BRCA
TCGA-S3-AA14-01A	1.33048	2.40724	1.26503	0.171461	5.06921	0.667918	Tumor	BRCA
TCGA-C8-A26V-01A	1.00369	4.25792	0.191732	0.086085	5.60913	0.168451	Tumor	BRCA
TCGA-BH-A1FB-01A	1.35575	2.47579	0.390979	1.19992	4.67592	0.130179	Tumor	BRCA
TCGA-D8-A1JP-01A	1.97574	3.39493	0.994636	0.50087	5.3536	0.188751	Tumor	BRCA
TCGA-E2-A14X-01A	1.30608	2.31888	0.251345	0.23347	4.92672	0.252349	Tumor	BRCA
TCGA-BH-A0E2-01A	1.4913	2.33338	0.311527	0.073315	5.45951	0.543096	Tumor	BRCA
TCGA-PL-A8LZ-01A	1.05522	2.91525	0.82109	0.730575	5.94771	0.0626809	Tumor	BRCA
TCGA-LL-A740-01A	1.31283	3.04647	0.470444	0.189276	5.92414	0.559163	Tumor	BRCA
TCGA-BH-A0AZ-11A	1.55157	2.41396	0.410641	1.12177	4.56904	0.632858	Normal	BRCA
TCGA-D8-A1X7-01A	1.12749	2.15815	0.298864	0.1026	5.39185	0.0524	Tumor	BRCA
TCGA-AO-A0JD-01A	1.38863	2.25317	0.308912	0.144562	4.96359	0.0169681	Tumor	BRCA
TCGA-D8-A1X5-01A	1.82167	1.83562	0.742201	0.0449948	5.34632	0.249972	Tumor	BRCA
TCGA-E9-A22E-01A	0.899289	2.41636	0.518856	0.0748246	5.50097	0.724934	Tumor	BRCA
TCGA-AC-A23E-01A	1.05546	2.45429	0.210988	0.0461703	4.88772	0.0850021	Tumor	BRCA
TCGA-AR-A0U2-01A	2.19782	2.29725	0.463305	0.266667	4.51667	0.176199	Tumor	BRCA
TCGA-A2-A1FV-01A	1.50963	1.74564	0.485939	0.233967	4.28147	0.089649	Tumor	BRCA
TCGA-A8-A09B-01A	1.92285	2.5403	1.16664	0.120717	5.30176	0.0466282	Tumor	BRCA
TCGA-AN-A0XO-01A	1.39378	2.74757	0.396283	0.0233542	4.78356	0.0493609	Tumor	BRCA
TCGA-A7-A425-01A	2.28007	3.07562	2.47912	0.595205	5.5518	0.101129	Tumor	BRCA
TCGA-BH-A0DD-11A	1.2858	2.58968	0.0331111	1.79503	4.69545	0.98388	Normal	BRCA
TCGA-A2-A0CZ-01A	0.7782	2.44856	0.340943	0.893019	5.19417	0.37184	Tumor	BRCA
TCGA-GM-A3NY-01A	1.52158	2.20344	1.93555	0.293631	4.54194	1.06056	Tumor	BRCA
TCGA-AR-A0U0-01A	1.01943	1.87476	0.0881269	0.241075	6.34388	0.129125	Tumor	BRCA
TCGA-AR-A24P-01A	1.16907	2.30209	0.235942	0.15742	4.71561	0.0130793	Tumor	BRCA
TCGA-AN-A0G0-01A	1.07873	1.8498	0.152047	0.00619528	5.25314	0.138765	Tumor	BRCA
TCGA-AN-A0AM-01A	1.15203	2.11953	0.488458	0.119106	6.20109	0.243122	Tumor	BRCA
TCGA-BH-A0E6-01A	0.845663	3.23242	0.108999	0.435615	5.06632	0.0369232	Tumor	BRCA
TCGA-E9-A248-01A	1.20918	2.94318	0.293869	0.600896	5.70409	0.440222	Tumor	BRCA
TCGA-B6-A1KN-01A	1.81762	2.78405	0.698542	0.278338	4.13473	0.0514529	Tumor	BRCA
TCGA-LL-A9Q3-01A	1.61873	2.7312	1.26624	0.156252	5.8385	0.528259	Tumor	BRCA
TCGA-A8-A08B-01A	1.36398	3.33837	1.52507	0.122942	4.9349	0.0385804	Tumor	BRCA
TCGA-A1-A0SG-01A	1.82141	2.9525	0.584136	0.148884	5.55803	0.0493224	Tumor	BRCA
TCGA-BH-A0H0-01A	0.926845	3.02843	1.13104	0.366323	4.65825	0.56802	Tumor	BRCA
TCGA-D8-A1XR-01A	1.18903	2.6517	0.528655	0.141197	5.48017	1.39387	Tumor	BRCA
TCGA-C8-A12P-01A	1.4651	2.76541	0.281133	0.0703657	5.49525	0.0503753	Tumor	BRCA
TCGA-BH-A0BJ-11A	1.26639	2.11442	0.179669	1.04688	4.68465	0.0374317	Normal	BRCA
TCGA-LL-A50Y-01A	1.37921	2.65381	1.69524	0.284589	5.82078	0.422092	Tumor	BRCA
TCGA-AO-A03N-01B	1.19602	1.18318	1.01546	0	4.18335	2.46731	Tumor	BRCA
TCGA-E2-A1IU-01A	1.8664	2.3803	0.768247	0.343175	5.59957	0.137807	Tumor	BRCA
TCGA-EW-A1IX-01A	1.04452	3.11912	0.4977	0.440996	5.12546	0.0329583	Tumor	BRCA
TCGA-A2-A0EV-01A	1.13792	3.32685	0.134474	0.311414	5.45204	0.329892	Tumor	BRCA
TCGA-BH-A0BT-11A	1.22708	2.66734	0.350445	1.14911	4.78506	0.585918	Normal	BRCA
TCGA-AC-A3W5-01A	2.00426	2.8728	1.34836	0.340933	5.24348	1.13592	Tumor	BRCA
TCGA-AR-A2LN-01A	1.46111	2.77925	0.91761	2.08983	4.7187	0.215013	Tumor	BRCA
TCGA-E9-A1QZ-01A	1.2059	2.32796	0.180029	1.28711	5.16381	0.318403	Tumor	BRCA
TCGA-BH-A8FY-01A	1.25676	2.88121	1.41983	0.287459	5.24816	0.049399	Tumor	BRCA
TCGA-AC-A6IX-06A	2.67273	2.85751	1.20585	1.85013	5.29319	1.40208	Tumor	BRCA
TCGA-AR-A1AL-01A	1.48466	2.40265	0.631444	1.37794	4.65807	0.0631233	Tumor	BRCA
TCGA-BH-A42T-01A	1.84205	2.50863	1.72874	0.221021	5.79511	0.0847877	Tumor	BRCA
TCGA-BH-A0B9-01A	1.11577	2.07726	0.127968	0.371986	4.86367	0.123822	Tumor	BRCA
TCGA-BH-A0BS-11A	1.10491	2.23391	0.126237	0.832452	4.92433	0.254064	Normal	BRCA
TCGA-AO-A0J8-01A	1.253	2.70286	0.35871	0.189014	5.52224	0.303347	Tumor	BRCA
TCGA-BH-A2L8-01A	1.08611	2.50651	0.343986	0.699278	5.37742	0.08251	Tumor	BRCA
TCGA-E9-A1N5-01A	2.40843	2.4848	1.68538	0.291568	5.20967	0.0695858	Tumor	BRCA
TCGA-A8-A075-01A	1.98261	2.48894	0.926041	0.0545263	5.14174	0	Tumor	BRCA
TCGA-AN-A0FZ-01A	2.41846	2.15949	1.54376	0.0664836	5.6474	0.345744	Tumor	BRCA
TCGA-D8-A1XJ-01A	0.880415	2.46388	0.50473	0.0119831	5.12993	1.47912	Tumor	BRCA
TCGA-E2-A15F-01A	1.70916	2.3585	0.548622	0.500399	5.69994	0.0399412	Tumor	BRCA
TCGA-A2-A0EP-01A	1.27596	2.76483	0.619058	2.04703	4.96425	1.86337	Tumor	BRCA
TCGA-BH-A18K-01A	1.45757	2.80949	0.899283	0.108315	4.56799	1.66579	Tumor	BRCA
TCGA-AR-A5QN-01A	1.64749	3.32131	1.20359	0.696102	5.40086	0.321857	Tumor	BRCA
TCGA-E9-A244-01A	1.1932	1.06748	0.267406	0.197244	5.02307	0.31512	Tumor	BRCA
TCGA-A8-A0A2-01A	2.16074	2.4527	0.853914	0.323678	4.91052	0.0259986	Tumor	BRCA
TCGA-B6-A40C-01A	2.21187	3.0361	2.49423	0.450338	5.59475	0	Tumor	BRCA
TCGA-AR-A2LQ-01A	1.05578	2.53497	0.249759	1.23184	5.14542	0.750443	Tumor	BRCA
TCGA-EW-A1J6-01A	1.7718	1.74187	1.4762	0.530044	5.95069	0.0791059	Tumor	BRCA
TCGA-EW-A1IZ-01A	1.25604	2.80567	1.01884	0.712051	6.34483	0.0633209	Tumor	BRCA
TCGA-AC-A2FG-01A	0.919872	2.59427	0.602679	1.52813	5.16859	0.108282	Tumor	BRCA
TCGA-A8-A09Z-01A	1.2073	3.73222	0.338136	0.0461204	6.27812	0.049131	Tumor	BRCA
TCGA-EW-A1P1-01A	0.844382	2.46031	0.144788	1.18917	4.52102	0.493644	Tumor	BRCA
TCGA-A8-A0A9-01A	2.15923	2.15922	1.22755	0.0800726	5.01174	0.129127	Tumor	BRCA
TCGA-BH-A0DT-01A	1.28474	2.36076	0.516683	0.57167	5.00036	0.0183538	Tumor	BRCA
TCGA-A2-A0T2-01A	0.948874	1.9751	0.671516	0.081592	4.79922	0.0177932	Tumor	BRCA
TCGA-A7-A4SA-01A	1.41063	2.80633	1.04017	0.443383	4.97712	0.192527	Tumor	BRCA
TCGA-D8-A27F-01A	0.93854	2.74182	0.22684	0.156496	4.95126	0.0125364	Tumor	BRCA
TCGA-D8-A146-01A	1.66734	2.60546	0.940861	0.451823	5.5168	3.13916	Tumor	BRCA
TCGA-D8-A27E-01A	0.727312	2.72661	0.301473	0.169405	5.68454	2.4477	Tumor	BRCA
TCGA-C8-A138-01A	2.37796	2.45215	0.852348	0.349356	5.05592	0.727382	Tumor	BRCA
TCGA-E2-A14V-01A	1.71944	2.84325	0.576146	0.0888661	5.03706	0.222526	Tumor	BRCA
TCGA-AC-A5EH-01A	1.14853	2.75152	0.67518	0.187319	6.14206	0.99274	Tumor	BRCA
TCGA-A2-A0YL-01A	1.07978	2.4564	0.336214	0.548287	4.86553	0.257072	Tumor	BRCA
TCGA-E2-A1LK-01A	0.908164	2.73717	0.640526	0.0247625	5.25663	0.0263916	Tumor	BRCA
TCGA-D8-A13Z-01A	1.36582	2.21572	0.523146	0.341497	5.31905	0.180786	Tumor	BRCA
TCGA-D8-A27V-01A	1.28312	2.55226	0.690033	0.846325	4.53947	0.0384537	Tumor	BRCA
TCGA-EW-A3U0-01A	1.24981	2.65149	0.397189	1.03193	5.50512	0.531717	Tumor	BRCA
TCGA-A2-A4S2-01A	2.04528	2.71361	0.678074	0.702443	5.22332	0.118701	Tumor	BRCA
TCGA-D8-A1XV-01A	0.825436	2.21588	0.157271	0.0474639	5.42217	0.210309	Tumor	BRCA
TCGA-BH-A1F0-01A	0.868708	2.32604	0.194003	0.915413	4.86787	0.721574	Tumor	BRCA
TCGA-AN-A0FT-01A	1.43903	2.52115	1.48433	0.237569	5.61025	0.310311	Tumor	BRCA
TCGA-A7-A0D9-11A	0.758685	2.17564	0.0121654	2.36594	4.72836	1.10972	Normal	BRCA
TCGA-E2-A15K-01A	1.99026	3.11437	1.19658	0.62435	5.40242	0.111802	Tumor	BRCA
TCGA-BH-A0DL-01A	1.25836	3.02926	0.455152	0.419418	4.96785	0.0529454	Tumor	BRCA
TCGA-A2-A0EY-01A	2.14084	3.23798	0.827272	0.298376	5.68543	1.12021	Tumor	BRCA
TCGA-B6-A0IG-01A	2.48935	2.82169	1.01401	0.203693	4.94119	0.653443	Tumor	BRCA
TCGA-BH-A0HI-01A	0.445362	2.49576	0.246521	0.126963	5.5574	1.83275	Tumor	BRCA
TCGA-E2-A576-01A	2.17985	2.02836	2.99667	0.304548	5.07516	0.546591	Tumor	BRCA
TCGA-BH-A201-01A	1.20364	2.39428	0.40257	0.380892	4.71898	0.303732	Tumor	BRCA
TCGA-D8-A1JB-01A	1.46843	2.98096	0.499797	1.17324	5.10882	1.00003	Tumor	BRCA
TCGA-A1-A0SN-01A	0.758512	2.48772	0.181276	0.392423	5.76311	0.110505	Tumor	BRCA
TCGA-A8-A08A-01A	1.06373	2.56132	0.419469	0.18489	5.5424	0.0496225	Tumor	BRCA
TCGA-A2-A0YI-01A	0.990241	2.3121	0.220925	0.603116	4.99219	0.371037	Tumor	BRCA
TCGA-AR-A1AN-01A	1.00868	2.26278	0.426055	0.445307	5.8368	0.129346	Tumor	BRCA
TCGA-AR-A2LM-01A	1.53746	2.47138	0.593261	0.238171	4.85172	0.131862	Tumor	BRCA
TCGA-AR-A5QQ-01A	0.8677	3.16114	0.344835	1.66485	5.07716	0.156618	Tumor	BRCA
TCGA-AR-A0TR-01A	1.38429	2.35571	1.33041	0.985479	5.2591	2.4825	Tumor	BRCA
TCGA-GM-A3XG-01A	1.18392	2.36794	0.896297	0.507153	5.22947	0.224601	Tumor	BRCA
TCGA-BH-A1FC-01A	0.750503	2.57357	0.077527	0.138817	6.00889	0.0580141	Tumor	BRCA
TCGA-A2-A0D1-01A	1.54157	2.01967	0.685782	0.0176284	5.82846	0.0916006	Tumor	BRCA
TCGA-EW-A1P7-01A	1.01966	2.85715	0.221218	1.2211	5.62095	0.0369316	Tumor	BRCA
TCGA-AR-A1AP-01A	0.917376	3.1757	0.336273	0.275061	4.98743	0	Tumor	BRCA
TCGA-E2-A150-01A	0.922948	2.63177	0.394548	0.122832	6.09439	0.071137	Tumor	BRCA
TCGA-EW-A2FW-01A	1.97281	2.63056	0.788806	0.332508	6.00987	1.17752	Tumor	BRCA
TCGA-AR-A1AV-01A	1.99943	2.09932	0.913343	0.0129093	5.31341	0.468216	Tumor	BRCA
TCGA-A2-A0T1-01A	1.23586	2.41223	0.426688	0.992324	5.22034	0.291373	Tumor	BRCA
TCGA-BH-A0BM-11A	1.18893	1.90308	0.0372253	1.02742	4.6446	0.0549921	Normal	BRCA
TCGA-BH-A0C0-11A	1.5325	2.25524	0.460182	1.88547	4.59055	0.372364	Normal	BRCA
TCGA-AO-A0JF-01A	0.528052	2.43194	0.187265	1.17363	5.13519	0.2261	Tumor	BRCA
TCGA-OL-A6VR-01A	1.84312	2.98148	1.4879	0.612207	5.83273	0.605909	Tumor	BRCA
TCGA-A8-A090-01A	1.15399	2.75129	0.494059	0.125441	5.98869	0.271021	Tumor	BRCA
TCGA-BH-A0BG-01A	1.14456	3.31552	0.00920417	0.372287	5.34212	0.0136604	Tumor	BRCA
TCGA-AO-A1KP-01A	2.26877	1.97924	1.08623	0.0344418	4.4764	0.0294341	Tumor	BRCA
TCGA-LL-A441-01A	2.05581	3.16626	1.44843	1.5922	5.45597	0.0595419	Tumor	BRCA
TCGA-C8-A133-01A	0.412333	2.67031	0.281293	0.0704085	6.06295	3.5394	Tumor	BRCA
TCGA-BH-A8FZ-01A	1.59942	2.79763	0.862676	1.05526	5.89825	0.527227	Tumor	BRCA
TCGA-E2-A1II-01A	0.727437	2.5166	0.0350948	0.397796	5.95739	0.0261645	Tumor	BRCA
TCGA-EW-A6SC-01A	1.50438	2.91246	1.33041	0.470525	5.27089	0.265722	Tumor	BRCA
TCGA-AN-A0XT-01A	1.70661	2.59499	1.91888	1.1104	5.48712	0.191651	Tumor	BRCA
TCGA-BH-A0RX-01A	0.414797	2.52783	0.104566	0.77169	5.10885	0.059219	Tumor	BRCA
TCGA-A8-A08X-01A	1.08336	2.51371	0.405065	0.185439	5.78412	0.229074	Tumor	BRCA
TCGA-AO-A03V-01A	1.74785	2.60084	0.703491	0.340672	5.11851	0.0536268	Tumor	BRCA
TCGA-EW-A1PH-01A	1.29632	2.35811	0.476089	0.13871	4.82145	0.0154435	Tumor	BRCA
TCGA-A2-A0ST-01A	0.946154	2.51983	0.150321	1.36121	5.09511	0.284099	Tumor	BRCA
TCGA-BH-A0BC-01A	0.459972	2.77177	0.391204	0.450318	5.52154	0.34493	Tumor	BRCA
TCGA-E9-A1NH-01A	1.20593	2.73254	0.662804	0.0737418	5.22065	0.0592771	Tumor	BRCA
TCGA-B6-A0X5-01A	1.59682	3.51325	0.880078	0.0841716	5.77541	0.0895902	Tumor	BRCA
TCGA-AC-A4ZE-01A	1.96323	2.96161	1.89547	0.372071	5.04494	0.112821	Tumor	BRCA
TCGA-A8-A07Z-01A	1.6666	3.49881	0.506639	0.275634	5.48738	0.234374	Tumor	BRCA
TCGA-OL-A66P-01A	1.05728	2.87579	0.694367	0.848098	6.62268	0.981958	Tumor	BRCA
TCGA-E2-A1LE-01A	1.36929	2.47001	0.233426	0.267837	5.9807	0.305904	Tumor	BRCA
TCGA-C8-A8HR-01A	1.35503	3.31227	1.31303	0.80791	5.20954	0.100464	Tumor	BRCA
TCGA-BH-A0H7-11A	0.853837	2.61537	0.286146	1.49455	5.10432	0.225381	Normal	BRCA
TCGA-A8-A09T-01A	1.58361	2.86341	0.467124	0.0181919	5.2906	0	Tumor	BRCA
TCGA-BH-A0HB-01A	1.02704	2.69549	0.461906	0.493291	5.1522	0.189327	Tumor	BRCA
TCGA-A8-A08G-01A	1.91185	3.30432	1.97079	0.166634	5.16742	0.0635343	Tumor	BRCA
TCGA-A2-A0EQ-01A	1.38667	2.81226	0.410654	0.404522	5.97394	0.365874	Tumor	BRCA
TCGA-A8-A081-01A	2.17211	2.70654	0.587932	0.280366	5.8215	0.212086	Tumor	BRCA
TCGA-AO-A1KO-01A	0.771218	1.56681	0.0953113	1.09337	3.85024	0.151531	Tumor	BRCA
TCGA-BH-A0HW-01A	1.93052	2.54033	0.994151	0.0380996	5.27912	0.216251	Tumor	BRCA
TCGA-OL-A66H-01A	0.903737	2.85748	0.88024	0.635727	5.68168	1.51983	Tumor	BRCA
TCGA-A2-A0T0-01A	0.682496	1.49143	0.393001	0.0203883	4.84611	0.0431412	Tumor	BRCA
TCGA-A7-A0DB-11A	0.894355	2.46063	0.117297	1.67686	4.61473	0.741128	Normal	BRCA
TCGA-AN-A04C-01A	1.47238	2.19844	0.78989	0.0582364	4.91543	0.24546	Tumor	BRCA
TCGA-E2-A573-01A	1.24213	2.38894	0.533806	0.384808	5.30261	0	Tumor	BRCA
TCGA-AN-A0XS-01A	2.07158	2.53376	1.20167	0.475654	5.52138	0.0779683	Tumor	BRCA
TCGA-D8-A3Z6-01A	1.56787	2.58972	1.10487	0.137022	5.39415	0.200061	Tumor	BRCA
TCGA-EW-A3E8-01B	1.6729	3.32705	1.3919	0.925407	5.73113	0.347765	Tumor	BRCA
TCGA-C8-A137-01A	1.42641	2.20349	0.145429	0.010625	5.03013	1.2649	Tumor	BRCA
TCGA-GM-A4E0-01A	1.44727	2.94449	1.17317	1.52614	4.74888	0.0899469	Tumor	BRCA
TCGA-E2-A1B4-01A	1.37255	2.49959	1.24192	0.0644718	5.23197	0.025344	Tumor	BRCA
TCGA-EW-A2FS-01A	2.26777	2.63087	1.95298	0.847635	4.99457	0.164811	Tumor	BRCA
TCGA-S3-A6ZG-01A	2.03155	3.207	1.59246	0.175803	5.33381	0.471919	Tumor	BRCA
TCGA-BH-A209-11A	1.0323	2.4577	0.183841	1.72654	4.28113	0.877288	Normal	BRCA
TCGA-GM-A3XN-01A	1.64859	2.87509	1.24667	0.899748	4.98677	0.356984	Tumor	BRCA
TCGA-EW-A1P8-01A	0.684318	2.84067	0.0875824	0.120673	5.42226	0.0166807	Tumor	BRCA
TCGA-E2-A156-01A	2.18232	2.57391	1.26986	0.035487	5.01369	0	Tumor	BRCA
TCGA-AC-A8OP-01A	0.836334	3.05705	1.05886	0.61502	6.80104	0.44518	Tumor	BRCA
TCGA-AN-A0FS-01A	0.955694	2.48961	0.246166	0.265593	5.10134	0.123631	Tumor	BRCA
TCGA-E2-A15M-11A	0.692037	2.35585	0.141604	2.62495	4.48687	0.0396614	Normal	BRCA
TCGA-B6-A0IM-01A	2.74888	3.14255	0.603014	0.071147	5.11433	0.179761	Tumor	BRCA
TCGA-E9-A3HO-01A	1.90256	3.10389	2.65375	0.511619	5.33746	0.171317	Tumor	BRCA
TCGA-E2-A1L7-11A	1.19234	2.38758	0.216227	1.35199	4.72925	0.197712	Normal	BRCA
TCGA-D8-A27K-01A	1.78991	2.71188	0.297549	0.303893	4.92182	0.0601301	Tumor	BRCA
TCGA-E9-A2JT-01A	2.03999	2.74657	0.562392	1.16915	4.98603	0.134536	Tumor	BRCA
TCGA-BH-A1EN-11A	1.04161	2.69313	0.140354	2.50794	4.33404	0.0827899	Normal	BRCA
TCGA-GM-A2DK-01A	1.37437	2.45331	0.64431	1.71896	5.34248	0.470116	Tumor	BRCA
TCGA-AR-A1AK-01A	1.29878	2.98046	0.760358	1.18035	5.86863	0.130935	Tumor	BRCA
TCGA-E2-A15R-01A	2.1766	2.68005	0.830507	0.0471347	4.79458	0.420529	Tumor	BRCA
TCGA-BH-A18Q-01A	1.86296	2.62509	0.696271	0.537728	5.40366	0.28711	Tumor	BRCA
TCGA-BH-A0DV-11A	1.17296	2.14306	0.273395	0.724103	4.39646	1.18439	Normal	BRCA
TCGA-E2-A153-01A	1.29129	2.63959	0.351526	0.122675	5.12457	0.191521	Tumor	BRCA
TCGA-BH-A0BT-01A	1.82191	3.12878	0.698166	0.190106	5.40052	0.0510906	Tumor	BRCA
TCGA-E9-A54Y-01A	1.70793	1.63322	2.25889	0.0629503	5.43284	0.172269	Tumor	BRCA
TCGA-E2-A14Q-01A	1.16457	2.797	0.462873	0.384051	5.46978	0.0774173	Tumor	BRCA
TCGA-BH-A0HN-01A	2.23795	3.29763	1.97239	0.103504	5.65584	4.63016	Tumor	BRCA
TCGA-E2-A1IK-01A	0.534393	2.83529	0.191055	0.846168	5.89421	1.43369	Tumor	BRCA
TCGA-E2-A10C-01A	3.13909	3.08267	2.83116	0.233457	5.20354	1.69302	Tumor	BRCA
TCGA-A8-A095-01A	1.65858	2.63407	0.495149	0.615027	5.21422	0.0507497	Tumor	BRCA
TCGA-BH-A0DH-11A	1.02658	2.47128	0.208779	3.21331	5.18103	0.157984	Normal	BRCA
TCGA-A7-A0DB-01A	1.21972	2.22965	0.46415	0.439451	5.38666	1.609	Tumor	BRCA
TCGA-BH-A18J-01A	1.24165	2.29474	0.327501	0.0714133	6.34034	0.0907692	Tumor	BRCA
TCGA-BH-A28O-01A	1.38725	2.66343	0.628874	1.34479	4.84262	0.237744	Tumor	BRCA
TCGA-AC-A3TN-01A	1.21368	2.68888	1.898	0.324173	5.66118	0.113394	Tumor	BRCA
TCGA-A7-A13E-01A	1.21513	1.76985	0.758612	0.0211199	7.27514	0.0973784	Tumor	BRCA
TCGA-BH-A0W5-01A	1.93416	2.41693	1.24925	1.46356	5.12839	0.229599	Tumor	BRCA
TCGA-GM-A2DD-01A	1.54808	2.69979	0.557718	0.791547	5.63154	2.21334	Tumor	BRCA
TCGA-AN-A0XV-01A	0.917545	2.68834	0.679183	0.504905	5.40263	0.42901	Tumor	BRCA
TCGA-E2-A1IL-01A	1.21798	2.64369	0.69206	0.31511	5.3282	0.66333	Tumor	BRCA
TCGA-EW-A2FR-01A	2.06231	2.80254	0.683331	0.125337	4.80699	0.0825866	Tumor	BRCA
TCGA-3C-AAAU-01A	2.53916	3.36548	1.78795	0.157149	5.90246	1.92793	Tumor	BRCA
TCGA-AR-A24W-01A	0.903368	2.4303	0.267426	0.683449	4.79458	0.368584	Tumor	BRCA
TCGA-OL-A5RZ-01A	2.04164	2.5442	1.76255	0.0904447	5.2551	0.106563	Tumor	BRCA
TCGA-E9-A1RB-01A	1.19939	2.67764	0.880794	0.0268639	6.13792	0.0229492	Tumor	BRCA
TCGA-AN-A0AJ-01A	1.28396	2.67309	0.528388	0.108563	4.89563	0.245138	Tumor	BRCA
TCGA-AR-A1AT-01A	0.860303	2.30692	0.347286	0.709041	5.34436	0.373665	Tumor	BRCA
TCGA-BH-A1FD-11B	0.78601	2.56305	0.113495	2.37117	4.29901	0.325913	Normal	BRCA
TCGA-A8-A09Q-01A	0.808171	2.53769	0.622652	0.116471	5.46931	0.349032	Tumor	BRCA
TCGA-A8-A083-01A	1.2334	2.4376	1.19906	0.122403	5.46178	0.272306	Tumor	BRCA
TCGA-AN-A0XL-01A	1.12884	2.30829	0.637308	1.18958	5.34472	0.101446	Tumor	BRCA
TCGA-E9-A1RC-01A	2.86602	2.87833	0.87043	0.0418212	4.47218	0.0224497	Tumor	BRCA
TCGA-D8-A27I-01A	1.79139	2.60508	0.721372	1.10416	5.12249	0.35109	Tumor	BRCA
TCGA-A2-A04Y-01A	1.17173	2.14488	0.636742	0.551483	5.91017	1.03104	Tumor	BRCA
TCGA-PE-A5DC-01A	2.49908	2.47295	2.6134	0.379025	5.59875	0.0566549	Tumor	BRCA
TCGA-OL-A5D8-01A	1.64775	3.30357	1.59892	0.149625	5.22391	0	Tumor	BRCA
TCGA-A7-A26E-01A	1.21346	2.42704	0.592263	0.657882	4.95213	0.0592411	Tumor	BRCA
TCGA-AN-A0FL-01A	2.6422	2.47398	0.744148	0.0679819	6.62794	1.84218	Tumor	BRCA
TCGA-A8-A0A1-01A	1.21831	2.6862	0.360929	0.251186	5.25253	0.973325	Tumor	BRCA
TCGA-AN-A0FN-01A	0.677009	2.85787	0.133017	0.675234	5.06303	1.09692	Tumor	BRCA
TCGA-D8-A1J9-01A	1.60148	2.84571	0.490636	0.0753314	5.20575	2.43437	Tumor	BRCA
TCGA-BH-A1EO-01A	1.2646	3.03291	0.380897	0.255486	5.04924	0.238363	Tumor	BRCA
TCGA-B6-A0I2-01A	1.04867	2.70678	0.667757	0.192431	5.25537	0	Tumor	BRCA
TCGA-E9-A5UP-01A	2.98868	3.07486	1.57969	0	5.64869	0.0391433	Tumor	BRCA
TCGA-A2-A0T5-01A	1.02376	2.62782	0.406361	0.244351	5.07554	0.032091	Tumor	BRCA
TCGA-A7-A0DA-01A	1.17445	2.189	0.0887993	0.035034	5.29878	0.130097	Tumor	BRCA
TCGA-BH-A1FJ-11B	0.532547	1.84304	0	1.10483	3.95216	0.416087	Normal	BRCA
TCGA-B6-A0IC-01A	1.81916	2.57045	1.36908	0.0117427	5.32292	0.384089	Tumor	BRCA
TCGA-BH-A1FH-11B	0.773891	2.55398	0.0157422	2.02641	4.42791	0.134682	Normal	BRCA
TCGA-BH-A5J0-01A	2.00834	2.83591	1.61723	0.39535	6.07775	0.302498	Tumor	BRCA
TCGA-A2-A0CY-01A	1.18517	1.9285	0.0527927	0.0186171	4.75837	0.0198447	Tumor	BRCA
TCGA-E9-A245-01A	1.19003	3.07994	0.729516	0.445334	5.64386	2.21122	Tumor	BRCA
TCGA-GM-A3NW-01A	1.54885	2.66074	0.719422	0.536644	5.06866	0.132382	Tumor	BRCA
TCGA-A1-A0SB-01A	1.08371	1.5693	0.360088	0.487024	4.30779	0.21801	Tumor	BRCA
TCGA-BH-A0B8-11A	0.951923	2.35479	0.0342964	3.1157	4.22814	0.192876	Normal	BRCA
TCGA-OL-A66N-01A	1.95441	2.95388	1.45812	1.1454	5.72761	2.17687	Tumor	BRCA
TCGA-A2-A0CQ-01A	1.90961	2.51833	0.873563	0.0952278	5.30079	0	Tumor	BRCA
TCGA-C8-A1HG-01A	1.04365	2.15183	0.421694	0.109523	5.89295	0.163698	Tumor	BRCA
TCGA-AC-A2BK-01A	0.376789	1.833	0.0220312	0.00771559	4.35123	0.0802265	Tumor	BRCA
TCGA-A8-A08J-01A	2.1783	2.44765	0.474191	0.0723617	5.15446	0.163082	Tumor	BRCA
TCGA-A8-A09V-01A	2.10832	2.52473	1.27517	0.112455	4.85399	0.0260207	Tumor	BRCA
TCGA-A2-A0T3-01A	1.54219	2.28677	0.454318	0.249158	5.34924	2.86489	Tumor	BRCA
TCGA-AC-A2FM-11B	1.14473	2.6198	0.390596	1.47471	5.16583	0.226854	Normal	BRCA
TCGA-C8-A1HK-01A	1.6054	2.06691	0.310557	0.213862	3.85054	0.0685816	Tumor	BRCA
TCGA-AN-A04A-01A	1.23059	2.65149	0.150463	0.0821388	4.44994	0.0544274	Tumor	BRCA
TCGA-E9-A1RG-01A	1.9875	3.21867	1.98485	0.146896	6.19274	0.129785	Tumor	BRCA
TCGA-JL-A3YW-01A	1.36727	2.60915	0.586789	0.442681	5.86322	0.343212	Tumor	BRCA
TCGA-E2-A154-01A	1.44208	2.12233	0.411401	0.116797	5.18007	0.023397	Tumor	BRCA
TCGA-A2-A04U-01A	1.04526	1.96143	0.131707	0.122776	5.0052	0	Tumor	BRCA
TCGA-BH-A0EE-01A	1.51783	2.76436	0.807733	0.293306	4.51465	0.343991	Tumor	BRCA
TCGA-BH-A0H5-01A	1.0158	2.63284	0.28992	1.92983	5.30575	0.327106	Tumor	BRCA
TCGA-EW-A1IW-01A	1.13773	2.25171	0.28553	0.796799	4.70701	0.0884902	Tumor	BRCA
TCGA-AO-A0J4-01A	1.46627	3.25822	0.0806438	0.526813	5.46856	0.0222434	Tumor	BRCA
TCGA-A7-A3J1-01A	1.70574	2.7716	0.679002	1.23571	5.49132	0.230463	Tumor	BRCA
TCGA-E9-A243-01A	0.604284	2.56867	0.158637	0.616155	5.6741	0.384797	Tumor	BRCA
TCGA-C8-A134-01A	1.13099	2.49032	0.805404	0.456479	6.19414	0.0907822	Tumor	BRCA
TCGA-BH-A1FC-11A	0.936618	2.79419	0.332937	3.11161	4.67547	0.277646	Normal	BRCA
TCGA-D8-A1Y1-01A	2.03919	2.78281	0.653328	0.0920568	5.17766	0.157985	Tumor	BRCA
TCGA-AO-A12A-01A	1.82146	2.82619	0.501701	0.531578	5.42147	0.0326593	Tumor	BRCA
TCGA-E2-A108-01A	1.4511	2.56728	0.531689	1.02521	5.64505	0.581876	Tumor	BRCA
TCGA-BH-A1F8-11B	0.854235	2.15685	0.151859	1.18407	4.40799	0.102096	Normal	BRCA
TCGA-BH-A0E1-01A	0.423252	2.45674	0.717428	0.138076	5.71248	3.14159	Tumor	BRCA
TCGA-BH-A204-11A	0.606353	2.18981	0.0273031	3.37861	4.16867	0.0536194	Normal	BRCA
TCGA-E2-A14U-01A	1.86166	3.02494	1.69756	0.621024	5.32295	0.425608	Tumor	BRCA
TCGA-BH-A0HL-01A	1.61375	2.74039	0.585668	0.0781118	5.50864	0.189329	Tumor	BRCA
TCGA-E9-A229-01A	1.42123	2.37234	0.502208	0.145702	5.19166	0.166127	Tumor	BRCA
TCGA-A8-A08T-01A	1.92789	2.67001	0.317028	0.0570024	4.98922	0.0306736	Tumor	BRCA
TCGA-E9-A1RF-01A	1.17627	2.80413	0.334471	0.125548	5.21468	1.13264	Tumor	BRCA
TCGA-A2-A04T-01A	0.677935	1.70919	0.239201	0.113941	5.0625	0.0439471	Tumor	BRCA
TCGA-E2-A15P-01A	1.31626	2.71501	0.56115	0.995726	5.64184	0.0855266	Tumor	BRCA
TCGA-C8-A3M8-01A	1.59777	2.8386	0.881659	0.544834	5.70298	0.190286	Tumor	BRCA
TCGA-LL-A5YO-01A	1.44779	3.67133	0.9296	1.19834	6.0593	1.63966	Tumor	BRCA
TCGA-OL-A66L-01A	1.43761	2.67765	2.15326	1.49654	5.55547	0.363202	Tumor	BRCA
TCGA-OL-A66K-01A	1.48466	2.96169	1.64046	0.484284	5.78064	0.173272	Tumor	BRCA
TCGA-E2-A1LG-01A	0.815084	1.75209	0.527014	0.146273	6.24954	0.841563	Tumor	BRCA
TCGA-E2-A1LS-01A	0.611193	1.2507	0.100489	0.0581568	4.34358	1.25351	Tumor	BRCA
TCGA-BH-A0H5-11A	1.21975	2.35082	0.370388	1.21784	4.58193	0.0764026	Normal	BRCA
TCGA-A7-A426-01A	1.7128	3.07711	2.02053	1.08777	5.57273	0.0404895	Tumor	BRCA
TCGA-BH-A0B7-01A	1.24654	2.52796	0.249382	0.77857	5.6726	1.64696	Tumor	BRCA
TCGA-AC-A2FO-01A	1.5432	2.72939	0.716579	1.23693	5.3162	0.123329	Tumor	BRCA
TCGA-D8-A27L-01A	2.1686	2.67182	0.999295	0.296332	4.97738	0.293711	Tumor	BRCA
TCGA-AC-A2FF-01A	1.07187	2.42869	0.280186	1.84064	4.91482	0.431348	Tumor	BRCA
TCGA-GM-A2D9-01A	1.63682	2.51622	1.1837	0.439922	4.95608	0.257654	Tumor	BRCA
TCGA-A2-A0D3-01A	1.49352	2.88374	0.400644	0.235677	5.10765	0.0610923	Tumor	BRCA
TCGA-A7-A0CH-11A	0.885462	2.68738	0.215462	2.06845	5.07808	1.14986	Normal	BRCA
TCGA-A2-A0EO-01A	1.14367	2.234	0.145039	0.383682	4.8378	0.130041	Tumor	BRCA
TCGA-E9-A1NA-11A	1.15684	2.73531	0.240441	1.56114	4.53887	0.0498561	Normal	BRCA
TCGA-A2-A0T7-01A	1.24844	2.2452	0.282951	0.294575	5.07741	0.443583	Tumor	BRCA
TCGA-OL-A6VO-01A	1.08273	2.0263	0.171581	0.13622	5.39432	0.0822457	Tumor	BRCA
TCGA-BH-A0EI-01A	1.55996	3.19756	0.49154	0.177063	5.27414	0.467736	Tumor	BRCA
TCGA-A8-A094-01A	1.43033	3.33867	0.301113	0.093028	6.43648	0.217047	Tumor	BRCA
TCGA-A8-A092-01A	1.47275	2.49958	0.486375	0.0626089	4.89389	0.0270393	Tumor	BRCA
TCGA-AC-A3W6-01A	1.44284	2.6308	1.11294	0.812643	5.17739	0.893646	Tumor	BRCA
TCGA-BH-A0BA-01A	2.03474	2.67874	1.24757	0.816133	5.52943	1.59405	Tumor	BRCA
TCGA-EW-A1OX-01A	1.30754	2.88615	0.237112	0.0737104	5.52172	0.134649	Tumor	BRCA
TCGA-A2-A0CR-01A	1.25665	2.22334	0.85854	1.67063	5.31083	0.172795	Tumor	BRCA
TCGA-D8-A1JD-01A	1.13106	3.53298	0.445467	0.0619115	5.2482	0.108266	Tumor	BRCA
TCGA-C8-A26X-01A	0.938513	2.79583	0.295684	0.279067	6.70883	2.27003	Tumor	BRCA
TCGA-E9-A1RC-11A	0.911908	2.36661	0.0418935	2.43039	4.36734	0.0977119	Normal	BRCA
TCGA-A1-A0SE-01A	0.950444	2.35622	0.323757	0.373595	5.23006	0.0750865	Tumor	BRCA
TCGA-A7-A4SF-01A	2.07706	3.00651	2.41246	0.125343	5.19779	0.133292	Tumor	BRCA
TCGA-OL-A66O-01A	1.32394	2.61332	2.20763	0.0586915	5.72747	0.137011	Tumor	BRCA
TCGA-C8-A26W-01A	1.83056	2.76827	1.50694	0.381649	5.35358	0.101347	Tumor	BRCA
TCGA-E2-A9RU-01A	0.535506	1.75054	0.581109	0.0729331	5.67028	0.102628	Tumor	BRCA
TCGA-AN-A0FW-01A	1.24935	3.17303	0.19859	0.518878	4.89889	1.74374	Tumor	BRCA
TCGA-D8-A1JC-01A	2.33039	2.83588	0.722507	0.075535	4.60275	0.0234361	Tumor	BRCA
TCGA-C8-A12V-01A	1.18677	3.10914	0.310285	0.710861	6.37227	0.0957111	Tumor	BRCA
TCGA-A2-A04P-01A	0.895243	1.75563	0.507188	0.22687	4.66705	1.27216	Tumor	BRCA
TCGA-BH-A0W3-01A	1.55336	2.52481	1.12646	0.08554	5.77925	0.0233052	Tumor	BRCA
TCGA-BH-A0B5-01A	1.67934	2.35343	0.843001	0.403013	5.19712	0.270467	Tumor	BRCA
TCGA-S3-AA10-01A	0.979038	2.28001	0.199806	0.753494	5.8896	0.151081	Tumor	BRCA
TCGA-BH-A0B0-01A	0.742123	2.82365	0.49674	1.52126	5.26579	0.730211	Tumor	BRCA
TCGA-E2-A574-01A	0.768162	1.59265	0.533094	0	5.47318	0.0985408	Tumor	BRCA
TCGA-AN-A0XN-01A	0.717923	2.45786	0.141799	0.0646154	5.14762	0.134477	Tumor	BRCA
TCGA-AN-A0XW-01A	0.997422	2.33184	0.681449	0.151512	5.39538	0.0502237	Tumor	BRCA
TCGA-BH-A0DK-11A	1.11554	2.29636	0.357092	0.354312	5.06525	1.97507	Normal	BRCA
TCGA-C8-A1HF-01A	1.1096	2.49846	0.689814	0.0365202	5.32623	0.113724	Tumor	BRCA
TCGA-BH-A0AU-11A	1.74598	2.29693	0.468283	1.20443	4.76122	0.0386367	Normal	BRCA
TCGA-AR-A2LO-01A	2.14512	2.73953	1.26768	0.859836	4.95207	0.0502811	Tumor	BRCA
TCGA-D8-A1XA-01A	1.44232	2.99759	1.32254	0.109789	5.96572	0.0550806	Tumor	BRCA
TCGA-BH-A0BL-01A	0.845255	2.27751	0.133705	0.500904	4.86991	0.0138168	Tumor	BRCA
TCGA-EW-A1J2-01A	1.31068	2.57371	0.41511	0.319156	5.06807	0.286119	Tumor	BRCA
TCGA-BH-A0AZ-01A	0.429849	2.62224	0.25031	0.401284	5.27239	1.94729	Tumor	BRCA
TCGA-E9-A227-01A	0.884102	3.00881	0.254543	0.749642	5.64924	0.119086	Tumor	BRCA
TCGA-A2-A0D2-01A	0.873196	2.08995	0.19325	0.208389	5.59465	0.0169766	Tumor	BRCA
TCGA-D8-A1XM-01A	1.23795	2.3468	0.195408	0.650905	5.39712	0.0727855	Tumor	BRCA
TCGA-D8-A1Y3-01A	0.958701	2.25561	0.53511	0.234985	6.11048	0.0547726	Tumor	BRCA
TCGA-C8-A275-01A	1.16196	2.14232	0.346447	0.286012	5.16241	1.10178	Tumor	BRCA
TCGA-E2-A3DX-01A	1.01088	2.60389	0.301238	1.38864	4.97444	0.873761	Tumor	BRCA
TCGA-C8-A1HM-01A	1.15227	2.45357	0.941029	0.3682	5.1577	0.0227581	Tumor	BRCA
TCGA-E2-A158-01A	0.696354	2.13548	0.351882	0.021208	5.12872	0.0448615	Tumor	BRCA
TCGA-AR-A0TP-01A	0.774737	1.58565	0.0814399	0.00728062	5.4035	0.0609628	Tumor	BRCA
TCGA-A7-A26F-01B	2.65184	2.32067	0.61372	0.498242	3.80733	0.242795	Tumor	BRCA
TCGA-A2-A1FW-01A	2.58562	2.73896	0.373193	0.693545	4.45015	0.335057	Tumor	BRCA
TCGA-E2-A15A-06A	2.06053	3.07245	0.771606	1.17742	5.04062	0.044793	Tumor	BRCA
TCGA-BH-A0C7-01B	1.39791	2.58475	0.627631	0.112127	5.37637	0.119272	Tumor	BRCA
TCGA-AR-A1AJ-01A	1.28763	2.65368	0.27625	0.850278	5.18602	0.242444	Tumor	BRCA
TCGA-E9-A1R5-01A	2.12403	2.33949	0.407413	0.109562	4.92534	0.0560214	Tumor	BRCA
TCGA-A8-A09A-01A	1.03262	2.69529	0.216401	0.285631	4.81975	0.0402621	Tumor	BRCA
TCGA-GM-A2DC-01A	2.6821	2.65412	1.34877	0.337272	4.95305	0.0251042	Tumor	BRCA
TCGA-A2-A3KC-01A	1.58624	2.71065	0.69378	0.731108	5.28835	0.930297	Tumor	BRCA
TCGA-AO-A0J9-01A	1.54384	2.12485	0.327571	0.800492	4.37799	0.954391	Tumor	BRCA
TCGA-E2-A14Y-01A	0.417495	2.1148	0.196093	2.11812	4.3604	0	Tumor	BRCA
TCGA-D8-A4Z1-01A	1.85558	3.00286	1.12452	0.43831	5.25666	0.12742	Tumor	BRCA
TCGA-3C-AALI-01A	2.77612	2.91691	1.48078	0.252653	5.03994	0	Tumor	BRCA
TCGA-E2-A159-01A	1.38617	2.47976	0.161685	2.08781	5.1791	0.318225	Tumor	BRCA
TCGA-E2-A155-01A	0.78742	2.71686	0.414195	0.215883	5.36933	0.06231	Tumor	BRCA
TCGA-A8-A082-01A	2.0275	2.83415	0.720981	0.115343	5.09958	0	Tumor	BRCA
TCGA-E2-A14R-01A	0.672389	1.9754	0.825393	0.093908	6.17023	0.545006	Tumor	BRCA
TCGA-D8-A141-01A	1.29895	2.53774	0.399386	0.351002	5.07704	0.168228	Tumor	BRCA
TCGA-BH-A204-01A	1.61874	1.72693	0.183465	0.12167	4.42291	0.106293	Tumor	BRCA
TCGA-E2-A109-01A	1.98425	3.24	0.575978	0.194718	4.90564	0.269583	Tumor	BRCA
TCGA-C8-A1HJ-01A	0.881983	1.42253	0.531629	0.151735	4.15288	0.0403797	Tumor	BRCA
TCGA-BH-A0C1-01B	1.31599	2.20051	0.215603	0.509777	5.12206	1.07037	Tumor	BRCA
TCGA-E9-A1RI-11A	0.652548	2.22186	0.0650545	2.99977	4.16396	0.0689771	Normal	BRCA
TCGA-D8-A1Y2-01A	1.34621	2.73154	0.648582	0.287832	6.13499	0.754265	Tumor	BRCA
TCGA-E2-A1LH-11A	1.44591	2.3389	0.491803	0.985049	5.00604	0.559	Normal	BRCA
TCGA-AR-A2LJ-01A	0.892912	2.51139	0.92179	1.32412	5.53504	1.40298	Tumor	BRCA
TCGA-AC-A2QH-01B	2.37385	1.97091	0.29753	0	2.02207	0.539967	Tumor	BRCA
TCGA-A2-A0YK-01A	1.03812	2.36017	0.401551	1.64121	4.54614	0.539223	Tumor	BRCA
TCGA-E9-A22H-01A	1.20857	2.20753	0.428883	0.237579	5.20217	0.070114	Tumor	BRCA
TCGA-E2-A1L8-01A	1.28943	2.42878	0.745444	0.529263	4.6733	0.124991	Tumor	BRCA
TCGA-BH-A0B8-01A	0.880726	2.33416	0.334271	0.328559	5.33896	0.156834	Tumor	BRCA
TCGA-BH-A18G-01A	0.545974	1.8368	0	0	4.75048	0.38786	Tumor	BRCA
TCGA-JL-A3YX-01A	2.15773	2.51392	1.83853	0.248889	5.27047	0.0689791	Tumor	BRCA
TCGA-S3-AA17-01A	1.72303	2.63286	0.728308	0.663311	5.43875	0.375276	Tumor	BRCA
TCGA-BH-A0B5-11A	0.718753	1.93854	0.0503378	3.09221	4.10763	0	Normal	BRCA
TCGA-E2-A15M-01A	1.0973	2.21997	0.37187	1.25761	5.25575	0.704075	Tumor	BRCA
TCGA-E2-A56Z-01A	1.93456	3.17831	1.53989	0.153023	5.35577	0.0788194	Tumor	BRCA
TCGA-A7-A0CH-01A	1.29846	2.29463	0.571749	0.30715	5.31966	0.398432	Tumor	BRCA
TCGA-AR-A0TZ-01A	2.35665	2.26469	0.741655	0.0486188	4.77587	0.314599	Tumor	BRCA
TCGA-E2-A15I-01A	2.26187	2.36891	1.171	0.758951	4.77189	1.67114	Tumor	BRCA
TCGA-BH-A0B4-01A	1.53177	2.07478	0.292172	0.422788	5.03549	0.594871	Tumor	BRCA
TCGA-E2-A15K-06A	2.03482	3.26094	1.68384	0.086975	5.64245	0.0343523	Tumor	BRCA
TCGA-BH-A0WA-01A	0.829727	2.21358	0.538658	0.214514	5.02037	0	Tumor	BRCA
TCGA-A2-A0ET-01A	1.48482	2.73475	0.681585	0.185667	5.5563	3.24857	Tumor	BRCA
TCGA-OL-A5RW-01A	1.60188	2.74143	0.33165	0.0587571	6.17352	0	Tumor	BRCA
TCGA-A7-A13D-01B	1.82178	1.84197	0.519648	0.435702	2.94547	0.949342	Tumor	BRCA
TCGA-AN-A0FD-01A	0.62253	2.2272	0.280872	0.00897654	5.64673	0.909638	Tumor	BRCA
TCGA-BH-A0H7-01A	0.768867	2.97583	0.151668	0.174745	5.11605	0.242555	Tumor	BRCA
TCGA-LL-A5YL-01A	1.9747	1.99496	0.965697	0.924403	5.40415	1.04436	Tumor	BRCA
TCGA-A2-A0D0-01A	0.539207	2.58913	0.0579107	0.0644306	5.54631	0	Tumor	BRCA
TCGA-AO-A129-01A	0.805524	2.51144	0.349728	0.318947	5.84025	0.178776	Tumor	BRCA
TCGA-BH-A1EW-01A	0.99512	2.68957	0.394472	0.821362	5.23677	0.0522802	Tumor	BRCA
TCGA-AO-A03M-01B	0.64727	3.15464	0.328908	0.515948	4.77679	0.518563	Tumor	BRCA
TCGA-B6-A0RP-01A	1.35212	2.59066	0.748477	0.224429	5.52612	0.167113	Tumor	BRCA
TCGA-E2-A15T-01A	1.31997	2.70189	0.55442	0.155499	5.15655	0.325708	Tumor	BRCA
TCGA-A2-A4RW-01A	2.27799	2.3982	1.70664	0.309264	5.18274	0.113145	Tumor	BRCA
TCGA-AC-A2FF-11A	1.26319	2.42819	0.251345	1.62525	4.87382	0.630509	Normal	BRCA
TCGA-BH-A0B7-11A	1.45351	2.0021	0.413289	0.873647	4.44644	0	Normal	BRCA
TCGA-A8-A08O-01A	1.71513	2.52905	0.805495	0.258548	5.4584	0.138872	Tumor	BRCA
TCGA-BH-A18I-01A	1.58	2.62072	1.17894	0.591682	4.95969	0.246263	Tumor	BRCA
TCGA-BH-A0BM-01A	1.0018	2.07902	0.543495	0.91657	5.27724	3.57724	Tumor	BRCA
TCGA-E2-A14N-01A	0.406885	1.20633	0.21995	0.0978065	5.39193	0.0764248	Tumor	BRCA
TCGA-5L-AAT0-01A	1.62041	2.69528	1.0314	0.26315	5.69232	0.570422	Tumor	BRCA
TCGA-E9-A1NG-11A	0.806631	2.4022	0.0733608	1.37159	4.45728	0.389745	Normal	BRCA
TCGA-BH-A6R9-01A	0.837243	2.78167	0.286786	0.339905	4.91348	0.0311033	Tumor	BRCA
TCGA-EW-A1PG-01A	0.820114	1.73777	0.0975561	0.314745	3.61773	0.049162	Tumor	BRCA
TCGA-AN-A03Y-01A	1.53472	2.70437	1.06401	0.12205	5.51337	0.0445767	Tumor	BRCA
TCGA-BH-A0DL-11A	1.57777	2.26201	0.237971	1.74485	4.50598	0.0695162	Normal	BRCA
TCGA-B6-A0RT-01A	1.59775	2.53117	0.209844	1.78112	5.43103	0.194171	Tumor	BRCA
TCGA-A2-A25D-01A	0.893628	2.86546	0.328383	0.589517	5.14791	0.130913	Tumor	BRCA
TCGA-A7-A56D-01A	1.6543	1.24704	2.06308	0.0978909	5.57245	0	Tumor	BRCA
TCGA-D8-A73W-01A	1.48559	2.63229	0.806876	0.223613	5.39835	0.0391462	Tumor	BRCA
TCGA-AO-A0J5-01A	0.980052	2.5041	0.331954	0.648221	5.70838	0.224348	Tumor	BRCA
TCGA-E9-A1R7-11A	1.06004	2.35239	0.0724989	2.54438	4.40113	0.409595	Normal	BRCA
TCGA-A2-A1G6-01A	1.17872	2.08045	0.312202	1.06098	4.67283	0.245321	Tumor	BRCA
TCGA-AC-A3OD-01B	1.3983	1.87294	0.092735	1.07758	4.39221	0.839542	Tumor	BRCA
TCGA-BH-A0H9-11A	0.549784	2.77012	0.093319	2.31218	4.99495	0.0925025	Normal	BRCA
TCGA-A7-A0CJ-01A	0.778875	2.98136	0.480539	0.034152	6.03524	0	Tumor	BRCA
TCGA-A8-A07U-01A	0.862287	2.48489	0.0119226	0.71034	5.13325	0.183564	Tumor	BRCA
TCGA-D8-A1XS-01A	1.95891	2.11466	0.0868922	0.108196	4.99784	0.47256	Tumor	BRCA
TCGA-B6-A0I8-01A	1.28455	2.95987	0.591299	0.185946	4.90905	0.257729	Tumor	BRCA
TCGA-LL-A5YM-01A	1.06704	2.13365	1.20808	0.529251	6.21457	1.06241	Tumor	BRCA
TCGA-E2-A15E-01A	1.61869	2.53531	0.575223	0.406996	4.9495	1.07648	Tumor	BRCA
TCGA-D8-A27G-01A	1.00338	2.17898	0.373651	0.108138	5.34713	0.159865	Tumor	BRCA
TCGA-BH-A1EX-01A	2.83143	2.5213	0.839852	0.174646	4.90311	0.76025	Tumor	BRCA
TCGA-A8-A076-01A	1.67602	2.43292	0.517005	0.154692	5.61001	2.83721	Tumor	BRCA
TCGA-EW-A1OV-01A	1.71766	2.48638	0.876951	0.634035	5.05282	0.136811	Tumor	BRCA
TCGA-B6-A0X7-01A	1.43365	2.31501	0.724299	0.307241	5.08426	0.189048	Tumor	BRCA
TCGA-B6-A0WT-01A	1.83976	2.60443	0.594702	0	5.0992	0.0595343	Tumor	BRCA
TCGA-A2-A4S3-01A	2.28859	3.11503	1.89267	0.0703644	5.94905	0.191732	Tumor	BRCA
TCGA-BH-A0BZ-01A	1.27018	2.62583	0.656771	0.106688	5.72946	0.944423	Tumor	BRCA
TCGA-OL-A5RU-01A	1.30137	3.30996	1.10626	1.42021	5.66645	1.00329	Tumor	BRCA
TCGA-D8-A73U-01A	1.45367	3.07338	0.777597	1.24945	5.88428	0.739015	Tumor	BRCA
TCGA-A2-A0YT-01A	1.49572	2.62417	0.906908	0.516753	5.76442	0.306247	Tumor	BRCA
TCGA-A1-A0SK-01A	1.17431	1.44236	0.222658	0.0139158	4.81552	0	Tumor	BRCA
TCGA-E9-A295-01A	1.89088	2.75731	1.16128	0.857877	5.24902	0.239758	Tumor	BRCA
TCGA-AR-A1AR-01A	0.740345	2.11123	0.0311914	0.730138	4.71039	0.19685	Tumor	BRCA
TCGA-D8-A1XY-01A	1.55562	3.02803	0.531144	0.135501	5.41874	0.102334	Tumor	BRCA
TCGA-LL-A8F5-01A	1.18507	2.61919	0.752292	0.0883283	5.99286	0.1437	Tumor	BRCA
TCGA-E9-A1R6-01A	2.11344	3.36447	1.39542	0.0951666	5.96467	0	Tumor	BRCA
TCGA-BH-A1FL-01A	2.19111	2.38988	0.927197	0.290556	5.09455	0.0414305	Tumor	BRCA
TCGA-BH-A18S-11A	1.01111	2.5871	0.198274	2.4074	5.07484	0.555097	Normal	BRCA
TCGA-E9-A1RE-01A	2.82723	3.12308	0.90947	0.210906	5.09495	0.0785492	Tumor	BRCA
TCGA-BH-A0BC-11A	0.798334	2.35235	0.174251	1.60346	4.65986	0.05782	Normal	BRCA
TCGA-D8-A1JN-01A	1.02248	2.62317	0.756994	0.448406	5.5058	2.90389	Tumor	BRCA
TCGA-D8-A145-01A	1.61221	2.5682	0.852704	1.20419	5.18711	0.98375	Tumor	BRCA
TCGA-B6-A0IK-01A	0.999791	3.01287	0.0871404	0.420588	4.9799	0.1277	Tumor	BRCA
TCGA-C8-A1HE-01A	1.17945	2.15272	0.462034	0.219623	5.64463	0.0739628	Tumor	BRCA
TCGA-A8-A0AB-01A	1.82397	2.31636	0.568039	0.0346519	5.4345	0.229987	Tumor	BRCA
TCGA-EW-A1J3-01A	1.27818	1.92788	0.458782	0.0942099	4.31887	0.241598	Tumor	BRCA
TCGA-GI-A2C8-01A	1.66284	3.12313	0.817292	0.522676	5.4935	0.375851	Tumor	BRCA
TCGA-A2-A0YJ-01A	1.17547	2.26988	0.252417	0.0515015	5.91397	0.0185183	Tumor	BRCA
TCGA-A8-A0A7-01A	1.24781	2.50825	0.159454	0.605279	5.73422	0.69045	Tumor	BRCA
TCGA-A8-A08L-01A	1.74993	2.42074	0.821269	0.357928	5.42891	0.350308	Tumor	BRCA
TCGA-BH-A0H6-01A	2.18957	2.44414	1.77912	0.152322	5.32101	0.39689	Tumor	BRCA
TCGA-D8-A1XL-01A	1.2148	2.41012	1.12316	0.486381	5.52619	0.05826	Tumor	BRCA
TCGA-E2-A10B-01A	1.44977	2.20238	0.606531	0.275763	5.34682	0.478283	Tumor	BRCA
TCGA-E9-A228-01A	1.68404	2.16346	0.544824	0.176885	5.02895	0.65476	Tumor	BRCA
TCGA-A2-A3KD-01A	0.845774	2.45225	0.100706	0.474422	5.27205	0.26923	Tumor	BRCA
TCGA-AQ-A7U7-01A	1.47704	3.10292	0.871207	1.01036	5.16558	0.0187941	Tumor	BRCA
TCGA-AO-A1KS-01A	0.817584	1.76854	0.354482	0.117991	4.72032	0.570172	Tumor	BRCA
TCGA-A7-A0DC-01B	3.71493	2.28346	2.0227	0.0976137	3.9265	0.376957	Tumor	BRCA
TCGA-BH-A0EB-01A	1.0994	2.54	0.150626	0.309977	5.48727	0.0997242	Tumor	BRCA
TCGA-E2-A1LB-11A	1.32049	2.17176	0.35046	0.683315	4.63051	0.14467	Normal	BRCA
TCGA-C8-A12W-01A	1.54833	2.57324	0.583355	0.0456645	5.13494	0.114107	Tumor	BRCA
TCGA-AR-A24L-01A	1.60738	3.33782	0.308766	0.13525	5.07855	0.660363	Tumor	BRCA
TCGA-EW-A1PB-01A	0.678342	4.06873	0.0961358	0.106803	6.96544	0.0292553	Tumor	BRCA
TCGA-D8-A1JJ-01A	1.35534	2.06149	0.586528	0.012713	5.13995	0.391188	Tumor	BRCA
TCGA-C8-A12Z-01A	0.702684	1.63086	0.126426	0	4.19588	0.218305	Tumor	BRCA
TCGA-A8-A09X-01A	1.53055	2.82263	0.301013	0.333279	5.09661	0.746247	Tumor	BRCA
TCGA-AC-A62Y-01A	1.22954	2.51618	0.720753	0.388853	5.90397	0.144784	Tumor	BRCA
TCGA-AC-A3YJ-01A	1.06416	3.42937	1.29258	0.158723	5.99251	2.65932	Tumor	BRCA
TCGA-E9-A22G-01A	0.63035	1.59844	0.0269685	0.150026	6.11967	0.0529681	Tumor	BRCA
TCGA-GM-A5PX-01A	1.11224	2.53835	1.27804	1.34887	5.36877	0.0386581	Tumor	BRCA
TCGA-A2-A4RX-01A	1.32279	2.70317	0.15891	0.324792	4.90022	0.0544511	Tumor	BRCA
TCGA-BH-A0HK-11A	0.690168	2.42178	0.187669	2.26876	4.7434	0.186078	Normal	BRCA
TCGA-B6-A0WW-01A	1.39649	3.02027	0.323153	0.0472998	5.43971	0.025413	Tumor	BRCA
TCGA-A2-A0SV-01A	1.17659	2.50533	0.539088	0.0459814	5.86637	0.0846589	Tumor	BRCA
TCGA-AR-A24U-01A	1.24182	2.40185	0.250797	1.01743	5.39748	0.884928	Tumor	BRCA
TCGA-B6-A0X0-01A	1.08593	2.61324	0.185066	0.216814	5.5404	0	Tumor	BRCA
TCGA-BH-A0EA-01A	1.74999	2.86976	0.55743	1.38196	5.08026	0.467181	Tumor	BRCA
TCGA-LL-A440-01A	1.75311	2.9284	0.766147	0.962803	4.71687	2.11146	Tumor	BRCA
TCGA-A1-A0SQ-01A	0.78908	2.67678	0.166636	0.295789	5.28729	0.0683721	Tumor	BRCA
TCGA-A8-A09N-01A	1.01729	2.95616	0.549586	0.220347	4.92254	0.496306	Tumor	BRCA
TCGA-AC-A3QQ-01B	2.19064	1.72483	0.0923252	0.243958	2.80077	0.408658	Tumor	BRCA
TCGA-E2-A1BC-11A	0.73748	2.32512	0.144723	1.58982	4.29796	0.0249261	Normal	BRCA
TCGA-BH-A18V-06A	1.58289	4.31994	0.60554	0.826583	6.16501	0.0882803	Tumor	BRCA
TCGA-BH-A18H-01A	1.0963	2.48484	0.915738	0.32754	5.03489	0.446142	Tumor	BRCA
TCGA-E2-A1LH-01A	1.26114	2.16542	0.1348	0.80806	5.40602	0.29722	Tumor	BRCA
TCGA-C8-A27A-01A	2.00701	2.51786	0.536763	0.106372	4.07023	0.0367042	Tumor	BRCA
TCGA-E9-A1R4-01A	2.36901	4.09799	1.59284	0.152426	5.56762	0.0189247	Tumor	BRCA
TCGA-A2-A3XU-01A	0.602932	2.04498	0.459022	0.0844048	5.06856	0.0456181	Tumor	BRCA
TCGA-HN-A2NL-01A	1.05249	1.97281	0.141338	0.526731	5.48671	0.0465401	Tumor	BRCA
TCGA-BH-A0BO-01A	0.666955	2.55065	0.422881	0.840987	4.67516	0.550011	Tumor	BRCA
TCGA-D8-A1Y0-01A	1.06393	2.47449	0.632173	0.513897	4.97781	0.202614	Tumor	BRCA
TCGA-B6-A40B-01A	2.29514	2.55603	1.08537	0.181645	5.28385	0.0829853	Tumor	BRCA
TCGA-PL-A8LX-01A	1.15472	2.70122	1.20715	0.174375	5.21637	0.0955905	Tumor	BRCA
TCGA-B6-A1KF-01A	0.99427	2.33795	0.469491	0.288241	5.42977	0.0204744	Tumor	BRCA
TCGA-AO-A0J7-01A	0.97062	1.96888	0.818967	0.0965776	6.27036	0.26838	Tumor	BRCA
TCGA-EW-A2FV-01A	0.970732	1.96511	0.292213	0.443049	5.4676	0.444447	Tumor	BRCA
TCGA-AR-A252-01A	0.909462	2.28085	0.317127	1.30711	4.86871	0.169949	Tumor	BRCA
TCGA-AN-A0XR-01A	1.93548	2.37874	0.987273	0.0096522	6.06773	0.0407299	Tumor	BRCA
TCGA-A2-A0YC-01A	1.34196	2.82223	0.416737	0.323115	5.33931	0.259724	Tumor	BRCA
TCGA-A8-A07P-01A	1.06516	2.76936	0.19116	0.186808	5.24639	0.441508	Tumor	BRCA
TCGA-BH-A1FR-11B	1.32163	2.59998	0.383628	1.54888	4.71522	2.37529	Normal	BRCA
TCGA-E9-A3X8-01A	1.38944	1.50006	1.58497	0.93758	5.4675	0.268013	Tumor	BRCA
TCGA-AC-A2B8-01A	1.82482	2.67729	0.75958	0.568504	4.80516	0.187746	Tumor	BRCA
TCGA-AO-A0JL-01A	1.3263	1.68267	1.02521	0.104168	5.05739	0.0207937	Tumor	BRCA
TCGA-BH-A1FB-11A	1.33402	2.32985	0.549417	2.01366	4.49937	0.495793	Normal	BRCA
TCGA-D8-A27W-01A	1.30176	2.44243	0.128984	0.270716	4.92296	0.0969481	Tumor	BRCA
TCGA-B6-A0RO-01A	0.59048	3.01319	0.162596	0.216203	6.33776	0.223399	Tumor	BRCA
TCGA-BH-A0DE-01A	1.95231	2.68669	0.939984	1.90568	5.45279	0.49528	Tumor	BRCA
TCGA-D8-A147-01A	1.3474	2.74638	0.212143	0.0594357	5.34308	0.0477309	Tumor	BRCA
TCGA-BH-A202-01A	0.876322	2.10214	0.204236	0.0744984	5.2603	0.134821	Tumor	BRCA
TCGA-BH-A18R-01A	1.68931	1.9113	0.345521	0.605915	4.7916	0.224513	Tumor	BRCA
TCGA-BH-A0HA-11A	1.36199	1.84637	0.189183	0.437228	4.22757	0.0909713	Normal	BRCA
TCGA-B6-A0RV-01A	1.05276	2.51152	0.187619	0.888922	4.9738	0.237462	Tumor	BRCA
TCGA-D8-A27P-01A	0.937551	2.71084	0.384399	0.306972	5.29034	0.0906282	Tumor	BRCA
TCGA-BH-A0W7-01A	1.43423	2.3616	0.678726	0.66221	5.25411	0.208262	Tumor	BRCA
TCGA-BH-A0E1-11A	0.859175	1.812	0.164726	0.549561	4.71182	0.124189	Normal	BRCA
TCGA-AC-A7VB-01A	2.26209	3.00956	1.65284	0.149883	4.74876	0.0853053	Tumor	BRCA
TCGA-AN-A046-01A	0.82928	2.7296	0.278279	0.286905	5.4529	0.0576997	Tumor	BRCA
TCGA-A2-A0SX-01A	0.878984	2.37437	0.060217	0.853603	5.69729	0.442566	Tumor	BRCA
TCGA-A8-A06N-01A	1.74872	3.1158	1.13153	0.106217	5.38167	0.113	Tumor	BRCA
TCGA-BH-A8G0-01A	1.24741	2.9736	0.630401	1.30875	5.2692	1.50808	Tumor	BRCA
TCGA-BH-A0HP-01A	1.04057	2.58847	0.25164	0.564687	5.60719	0.325281	Tumor	BRCA
TCGA-BH-A18U-01A	1.43276	1.98785	0.4509	0.0146813	5.1034	0.177456	Tumor	BRCA
TCGA-AN-A0AS-01A	0.92224	2.23096	0.217017	0.0255438	4.47659	0.0714857	Tumor	BRCA
TCGA-AO-A0JC-01A	1.98543	2.66812	0.730074	3.33159	4.66149	0.0764193	Tumor	BRCA
TCGA-BH-A1F2-01A	0.918052	2.30065	0.204418	0.589755	4.37468	0.667483	Tumor	BRCA
TCGA-BH-A18M-01A	1.64607	2.4417	0.318534	0.652709	4.93196	0.0337836	Tumor	BRCA
TCGA-C8-A12L-01A	1.97415	2.75235	0.396362	0.0255497	6.48574	0.397871	Tumor	BRCA
TCGA-E9-A1R7-01A	0.907324	2.7101	0.326122	0.241016	6.01253	0.104879	Tumor	BRCA
TCGA-BH-A1FH-01A	0.994919	2.29666	0.155634	0.818055	4.79058	0.1543	Tumor	BRCA
TCGA-AR-A24V-01A	1.33551	2.54812	0.307575	0.0481971	5.1437	0.0130075	Tumor	BRCA
TCGA-AC-A6IX-01A	2.49736	2.91964	0.882336	0.758306	4.80628	0.102647	Tumor	BRCA
TCGA-D8-A1JH-01A	1.52877	2.7032	0.380869	1.09304	5.0384	0.398842	Tumor	BRCA
TCGA-BH-A1FE-01A	1.33041	2.02359	0.135414	1.30366	5.00234	0.0960417	Tumor	BRCA
TCGA-A2-A25C-01A	1.25041	2.67636	0.30219	0.310592	4.75539	0.910996	Tumor	BRCA
TCGA-B6-A0IQ-01A	0.177927	2.28697	0.202469	0.0709433	5.1215	0.0507917	Tumor	BRCA
TCGA-AO-A0JI-01A	0.924994	2.58293	0.327272	0.271484	5.24628	0.339086	Tumor	BRCA
TCGA-AC-A2FB-11A	0.760758	2.56518	0.0684639	1.9667	4.58746	0.124727	Normal	BRCA
TCGA-B6-A0IA-01A	0.624879	2.51156	0.385368	0.0069802	5.64659	0.0295422	Tumor	BRCA
TCGA-E2-A1L7-01A	1.13309	2.33943	0.880575	0.208927	5.90783	0.192113	Tumor	BRCA
TCGA-BH-A18F-01A	1.62843	2.59263	0.750051	0.77096	5.14458	0.150003	Tumor	BRCA
TCGA-C8-A1HI-01A	1.2801	2.43459	0.38493	1.02818	5.2265	0.594905	Tumor	BRCA
TCGA-A2-A0YD-01A	1.10501	2.74978	0.552978	0.520117	5.07385	1.378	Tumor	BRCA
TCGA-A8-A06U-01A	1.43662	3.00149	0.865036	0.128905	5.47616	0.120631	Tumor	BRCA
TCGA-BH-A18S-01A	0.442621	3.21972	0.228297	0.350897	5.64375	0.27564	Tumor	BRCA
TCGA-A8-A08S-01A	1.90872	2.64335	0.613774	0.107772	4.64421	0.0278076	Tumor	BRCA
TCGA-A8-A08C-01A	1.55323	2.81623	0.229415	0.094773	5.17774	0.0159818	Tumor	BRCA
TCGA-C8-A1HO-01A	1.24753	2.52062	1.17073	0.679501	5.17738	0.213053	Tumor	BRCA
TCGA-AO-A0JG-01A	1.22935	2.46518	0.756704	0.633493	5.17444	0.36899	Tumor	BRCA
TCGA-E9-A1NF-01A	1.43739	2.887	1.07003	0.291722	5.29377	1.00157	Tumor	BRCA
TCGA-AO-A0J6-01A	0.491632	3.42631	0.235	0.137736	5.78708	0.0580921	Tumor	BRCA
TCGA-LL-A5YP-01A	0.688444	2.54564	0.607148	0.818129	4.964	0.0206313	Tumor	BRCA
TCGA-BH-A0DI-01A	1.2001	2.81143	0.133279	0.552429	5.41044	0.32396	Tumor	BRCA
TCGA-BH-A1FJ-01A	0.733617	2.71944	0.114698	0.0626229	5.57543	0.843806	Tumor	BRCA
TCGA-UU-A93S-01A	1.49212	3.03833	0.849864	0.137313	5.89482	1.11858	Tumor	BRCA
TCGA-A2-A0YE-01A	1.85582	2.509	2.48428	0.0349015	5.17184	0	Tumor	BRCA
TCGA-BH-A209-01A	0.921552	2.22843	0.18781	0.586994	5.78103	0.315266	Tumor	BRCA
TCGA-OL-A5RX-01A	1.59204	2.8852	0.695045	1.44287	5.3644	0.0618595	Tumor	BRCA
TCGA-E2-A15D-01A	2.25169	2.58226	0.965137	1.10747	5.07614	0.0807115	Tumor	BRCA
TCGA-D8-A27H-01A	1.30708	2.86025	0.251218	0.07078	5.81607	0.0139976	Tumor	BRCA
TCGA-BH-A1F6-01A	0.175381	2.71106	0.453747	0.364042	5.3864	0.150399	Tumor	BRCA
TCGA-A1-A0SD-01A	1.38113	2.27924	0.286973	0.699336	4.767	0.310222	Tumor	BRCA
TCGA-A7-A26J-01B	2.52114	1.86224	1.46536	0.3909	3.18393	0.288358	Tumor	BRCA
TCGA-D8-A1XC-01A	1.12098	2.60233	0.834307	0.0379024	5.7107	0.568119	Tumor	BRCA
TCGA-A2-A04R-01A	1.73218	2.41257	0.470734	0.198655	5.05228	0.139083	Tumor	BRCA
TCGA-LD-A66U-01A	1.59756	2.28743	1.86559	0.633458	5.28958	0.0319534	Tumor	BRCA
TCGA-E2-A15O-01A	2.64468	3.26681	2.04023	0.214401	5.36464	0.0992169	Tumor	BRCA
TCGA-AR-A24T-01A	1.09409	2.63842	0.195845	0.254613	5.43299	0.141322	Tumor	BRCA
TCGA-BH-A0HO-01A	0.494657	2.49955	0.182453	0.180283	5.99727	3.38221	Tumor	BRCA
TCGA-A7-A6VW-01A	1.08022	2.43773	0.318684	0.0861437	4.98363	0.0188091	Tumor	BRCA
TCGA-E2-A153-11A	1.22809	2.4351	0.270779	0.918966	4.8633	2.56322	Normal	BRCA
TCGA-BH-A0HY-01A	1.11103	1.72124	0.551029	0.0431922	4.73027	0.0460147	Tumor	BRCA
TCGA-3C-AALJ-01A	3.01602	2.67729	2.08663	0.568556	4.97634	0.339039	Tumor	BRCA
TCGA-BH-AB28-01A	1.55924	2.93925	0.742989	0.529481	5.27151	0.134026	Tumor	BRCA
TCGA-A7-A0CG-01A	0.935739	2.79292	0.122133	0.956315	4.97076	1.0527	Tumor	BRCA
TCGA-A8-A08H-01A	1.0292	3.00875	0.173343	0.970632	5.69446	0.299173	Tumor	BRCA
TCGA-B6-A0WV-01A	1.63986	2.65789	0.408465	0.102428	5.46227	0.022464	Tumor	BRCA
TCGA-D8-A1XF-01A	1.62031	2.44704	0.992657	0.0991975	4.96917	0.0167494	Tumor	BRCA
TCGA-BH-A0BQ-01A	0.671727	2.56937	0.122442	0.747658	5.59983	0	Tumor	BRCA
TCGA-E9-A1RF-11A	0.842146	2.25324	0.0304632	1.39292	4.01806	0.6805	Normal	BRCA
TCGA-EW-A1PC-01B	1.07686	2.34952	0.672282	0.0631229	4.89957	0.389581	Tumor	BRCA
TCGA-A8-A08I-01A	1.28762	2.91384	0.851865	0.227566	5.04382	1.1351	Tumor	BRCA
TCGA-B6-A0X4-01A	1.24839	2.99804	0.716509	0	5.52459	2.59067	Tumor	BRCA
TCGA-E9-A2JS-01A	2.67704	2.43781	0.968965	0.0354813	4.72538	0.0303241	Tumor	BRCA
TCGA-A8-A096-01A	0.925545	2.56928	0.162721	0.226049	5.56396	0.301101	Tumor	BRCA
TCGA-BH-A1F6-11B	0.871208	2.06117	0.0883029	2.12277	3.89585	0.308969	Normal	BRCA
TCGA-B6-A0WY-01A	0.83681	2.6527	0.292893	0.624323	5.54634	0.0459738	Tumor	BRCA
TCGA-BH-A18V-11A	1.46093	2.08007	0.680625	2.21802	4.90961	0.194755	Normal	BRCA
TCGA-A8-A09E-01A	1.11102	2.50304	0.796917	0.162876	6.08903	0	Tumor	BRCA
TCGA-BH-A1ES-06A	2.7831	3.36906	0.805948	2.69567	4.6534	0.045998	Tumor	BRCA
TCGA-EW-A1OW-01A	1.19771	3.02008	0.337474	0.0923744	5.22166	0.0445192	Tumor	BRCA
TCGA-D8-A1XD-01A	1.64423	2.38305	0.773439	0.0380469	4.40143	0.0992859	Tumor	BRCA
TCGA-E9-A54X-01A	1.41301	2.6728	0.980044	0	5.58259	0.0709776	Tumor	BRCA
TCGA-B6-A0RG-01A	1.30045	2.80164	0.591847	0.0825836	5.65512	0.26805	Tumor	BRCA
TCGA-A8-A097-01A	2.48207	2.98757	0.742685	0.155137	5.2258	0.154446	Tumor	BRCA
TCGA-A2-A0CX-01A	1.30685	2.29149	0.665702	0.0233916	5.51484	0.712946	Tumor	BRCA
TCGA-E9-A5FK-01A	1.30809	2.28994	1.43005	1.22643	5.76587	0.122184	Tumor	BRCA
TCGA-BH-A1FG-11B	0.259189	1.39949	0	1.90174	3.29622	0.0945563	Normal	BRCA
TCGA-C8-A8HQ-01A	1.90906	2.72557	1.7238	0.339159	5.28023	0.864876	Tumor	BRCA
TCGA-BH-A0BP-01A	1.73987	2.95113	0.887555	0.608754	5.93288	0.173707	Tumor	BRCA
TCGA-B6-A0RL-01A	2.74146	2.56167	2.31821	0.0358641	4.19692	0.0606659	Tumor	BRCA
TCGA-A8-A08F-01A	1.53122	2.70968	0.707585	0.080726	5.60933	0.0388239	Tumor	BRCA
TCGA-A2-A0CK-01A	1.04711	2.57369	0.701491	1.26239	5.40107	0.12334	Tumor	BRCA
TCGA-E9-A1N4-01A	0.718842	3.07682	0.153162	0.291059	4.87449	0.24998	Tumor	BRCA
TCGA-D8-A1XZ-01A	1.29692	2.74172	0.879702	0.0612447	5.22122	0.0779181	Tumor	BRCA
TCGA-AR-A1AS-01A	2.00285	2.26933	0.999268	0.0100099	5.21839	0.142669	Tumor	BRCA
TCGA-BH-A18N-11A	1.30088	2.62229	0.240321	1.47177	4.58004	0.161627	Normal	BRCA
TCGA-EW-A424-01A	1.67491	2.41422	1.69129	0.657937	5.66961	0.0869696	Tumor	BRCA
TCGA-A7-A3RF-01A	0.958882	3.16794	0.795284	0.109979	6.01532	4.10506	Tumor	BRCA
TCGA-AR-A24H-01A	1.73613	1.92487	0.761712	0.222342	4.44054	0.122798	Tumor	BRCA
TCGA-A8-A06T-01A	1.30556	2.71299	1.11073	0.188562	5.88661	0.0385378	Tumor	BRCA
TCGA-C8-A1HL-01A	1.62878	2.24974	0.650293	0.318611	4.94861	1.64352	Tumor	BRCA
TCGA-D8-A1X8-01A	0.955641	2.45149	0.415701	0.479906	5.38921	0.216446	Tumor	BRCA
TCGA-AO-A1KT-01A	2.17901	2.67125	0.553651	0.0923255	4.43594	0.117123	Tumor	BRCA
TCGA-E2-A15K-11A	0.883791	2.43069	0.280224	2.42301	4.8484	0.38507	Normal	BRCA
TCGA-B6-A0RQ-01A	1.29948	2.51221	0.261769	0.431925	5.17866	0.179596	Tumor	BRCA
TCGA-AR-A1AQ-01A	0.922903	2.71559	0.0944093	0.39421	6.43863	0.0935835	Tumor	BRCA
TCGA-OL-A5D6-01A	1.21694	3.15632	0.667026	0.598086	5.73682	0.570857	Tumor	BRCA
TCGA-A8-A091-01A	3.73889	3.05286	1.6663	0.221624	5.23208	0.339827	Tumor	BRCA
TCGA-A7-A4SE-01A	1.84622	2.97464	0.369361	0.156967	5.33637	0.0793907	Tumor	BRCA
TCGA-AC-A2FE-01A	1.50522	2.78377	0.493439	0.916051	5.21466	0.0590849	Tumor	BRCA
TCGA-BH-A1F2-11A	1.07837	2.32547	0.0911926	1.72923	4.35089	0.0903941	Normal	BRCA
TCGA-E9-A1ND-11A	1.1103	2.89059	0.327491	2.28369	4.97647	2.60564	Normal	BRCA
TCGA-C8-A26Z-01A	1.97191	3.24984	0.742406	0.122335	4.15551	0.0534564	Tumor	BRCA
TCGA-C8-A12Y-01A	2.58156	2.20907	1.03198	0.149013	5.19647	0.135119	Tumor	BRCA
TCGA-A7-A13F-01A	0.671409	2.45099	0.158641	0.0652849	6.38451	0.119541	Tumor	BRCA
TCGA-BH-A28Q-01A	1.32328	2.35672	0.732841	0.337552	4.91006	0.0698508	Tumor	BRCA
TCGA-GM-A5PV-01A	1.08654	2.89811	0.771302	0.866391	5.6208	1.30813	Tumor	BRCA
TCGA-A7-A4SC-01A	2.06395	2.71231	1.03328	0.571747	5.35373	0.602753	Tumor	BRCA
TCGA-A8-A09G-01A	0.946762	2.4324	0.447298	0.335788	5.20834	1.39518	Tumor	BRCA
TCGA-A7-A13E-11A	0.850927	2.52676	0.116084	2.28116	4.53739	0.304813	Normal	BRCA
TCGA-E2-A15H-01A	2.02832	2.38317	1.00682	0.132527	4.99703	1.76481	Tumor	BRCA
TCGA-A7-A13E-01B	1.19514	0.652315	0.142055	0.299568	3.78963	0.206408	Tumor	BRCA
TCGA-B6-A0IH-01A	1.49753	2.33985	0.266667	0.798206	5.70174	0.0936464	Tumor	BRCA
TCGA-A2-A1G4-01A	1.81693	2.39807	0.446051	0.292137	4.41542	0.0954346	Tumor	BRCA
TCGA-A8-A093-01A	1.33005	2.07225	0.514525	0.0810739	5.18788	0.141091	Tumor	BRCA
TCGA-C8-A12O-01A	1.45621	2.51967	0.366092	0.109111	5.15549	0.157299	Tumor	BRCA
TCGA-AO-A1KQ-01A	1.66844	2.87651	1.1214	0.19376	5.52782	0.368757	Tumor	BRCA
TCGA-AR-A256-01A	0.574998	1.49653	0.0830229	0.0455964	4.85517	0.134659	Tumor	BRCA
TCGA-OL-A66I-01A	1.11264	2.69457	0.616599	0.287439	5.96479	0.181864	Tumor	BRCA
TCGA-C8-A3M7-01A	1.66285	3.00596	0.835153	2.50421	5.04369	1.46138	Tumor	BRCA
TCGA-A2-A04W-01A	0.947179	1.60892	0.246241	0.0860257	4.84921	1.27044	Tumor	BRCA
TCGA-OL-A97C-01A	1.29149	2.22671	0.434921	0.849324	5.3223	0.215268	Tumor	BRCA
TCGA-AR-A1AM-01A	1.78661	2.87404	1.20543	1.02533	5.4746	0.395585	Tumor	BRCA
TCGA-AR-A2LR-01A	0.837335	1.71907	0.494672	0.304708	4.25656	0	Tumor	BRCA
TCGA-EW-A1OZ-01A	2.20467	2.92118	0.677903	0.0526372	4.98896	0.0833012	Tumor	BRCA
TCGA-A1-A0SF-01A	1.12666	2.35726	0.627988	0.973043	5.32262	1.26619	Tumor	BRCA
TCGA-A1-A0SJ-01A	1.13164	2.56093	0.316607	0.556143	4.96148	0.399636	Tumor	BRCA
TCGA-A7-A13G-11A	0.807549	2.06626	0.0363407	1.96764	4.09694	0.040456	Normal	BRCA
TCGA-D8-A1JU-01A	1.08138	2.37841	0.442903	0.638336	4.88487	0.199589	Tumor	BRCA
TCGA-A8-A07F-01A	1.58234	2.4843	0.319086	0.0765331	5.43617	0.569639	Tumor	BRCA
TCGA-A7-A6VY-01A	1.49416	3.84513	1.40588	0.121744	6.20943	0.0158494	Tumor	BRCA
TCGA-BH-A1FU-11A	1.6883	2.4879	0.481355	1.16756	4.42633	0.0752171	Normal	BRCA
TCGA-BH-A0BZ-11A	1.02595	2.60711	0.102423	2.01829	4.69822	0.323704	Normal	BRCA
TCGA-A2-A0CU-01A	1.75367	2.5199	0.812758	0.791519	5.74895	0.0474042	Tumor	BRCA
TCGA-BH-A18L-11A	1.11462	2.58793	0.247658	2.04051	4.78538	0.229379	Normal	BRCA
TCGA-E9-A1NE-01A	1.07946	2.19508	0.405118	0.699944	4.67217	0.144232	Tumor	BRCA
TCGA-A7-A0D9-01A	2.33701	2.04467	0.637146	0.142695	4.67411	0.151687	Tumor	BRCA
TCGA-C8-A12K-01A	0.848694	2.28852	0.112125	0.409879	6.93921	0.298959	Tumor	BRCA
TCGA-A8-A07O-01A	0.469958	1.80639	0.146818	0.125984	4.43551	0.0377889	Tumor	BRCA
TCGA-C8-A12U-01A	2.39133	2.96244	1.484	0.154021	5.16263	0.0793469	Tumor	BRCA
TCGA-C8-A8HP-01A	2.36731	2.30141	2.14422	0.331348	4.82948	0.308734	Tumor	BRCA
TCGA-A2-A3XV-01A	0.941979	1.66977	1.37644	0.115455	5.87568	1.30065	Tumor	BRCA
TCGA-BH-A0AW-01A	1.30717	2.27813	0.335241	0.464481	5.42059	0.829992	Tumor	BRCA
TCGA-AN-A0FF-01A	1.08436	2.69156	0.759895	0.489183	5.56139	2.91139	Tumor	BRCA
TCGA-AR-A24M-01A	0.589084	2.63905	0.191198	0.0431899	4.90386	0.0572896	Tumor	BRCA
TCGA-BH-A0DP-11A	1.23025	2.42548	0.245327	0.754697	5.03199	0.136442	Normal	BRCA
TCGA-E2-A2P6-01A	2.71551	2.75645	3.20837	0.36956	5.53941	0.124844	Tumor	BRCA
TCGA-C8-A130-01A	2.15136	2.27587	1.39332	0.0772975	5.77037	0.144894	Tumor	BRCA
TCGA-C8-A274-01A	1.34707	2.424	0.5902	0	5.10457	0.677421	Tumor	BRCA
TCGA-E9-A1RD-11A	0.968259	2.50077	0.164518	2.48392	4.49217	0.962774	Normal	BRCA
TCGA-D8-A73X-01A	1.99011	2.68357	1.39817	0.172845	5.14643	0.700919	Tumor	BRCA
TCGA-AO-A0JA-01A	1.08544	2.86335	0.154592	0.157842	5.62134	0.418196	Tumor	BRCA
TCGA-LL-A5YN-01A	1.1603	2.67968	1.63617	1.58045	5.97289	0.31848	Tumor	BRCA
TCGA-D8-A1XB-01A	1.49273	2.55617	0.706952	0.00990067	4.98629	0.160268	Tumor	BRCA
TCGA-LL-A6FP-01A	2.00812	2.84397	2.13787	0.329604	5.5723	1.48157	Tumor	BRCA
TCGA-A7-A26E-01B	2.2737	1.93383	1.24827	0.0274003	3.40268	0.166949	Tumor	BRCA
TCGA-A7-A6VX-01A	1.82234	3.26333	1.73638	0.0604216	5.12665	0.143069	Tumor	BRCA
TCGA-AC-A6IW-01A	0.607569	2.41698	0.159271	2.46453	5.4523	0.107169	Tumor	BRCA
TCGA-BH-A0C3-01A	1.33207	2.22985	0.247969	0.51546	5.13681	0.229669	Tumor	BRCA
TCGA-E9-A1NF-11A	0.861075	2.84324	0.073321	1.76733	4.38283	0.499087	Normal	BRCA
TCGA-E2-A1L9-01A	1.5806	2.68295	0.501567	0.232229	4.78476	0.456794	Tumor	BRCA
TCGA-BH-A1EV-01A	1.15477	2.94178	0.469868	0.0154013	4.77295	0.214414	Tumor	BRCA
TCGA-A2-A3XX-01A	1.34536	3.14681	0.80873	0.238316	4.98892	0.0453359	Tumor	BRCA
TCGA-E9-A1NA-01A	1.00107	2.46644	0.69689	0.311441	6.70424	0.118556	Tumor	BRCA
TCGA-EW-A1OY-01A	1.04174	2.2429	0.32481	0.0921972	5.85042	0.149872	Tumor	BRCA
TCGA-BH-A0AU-01A	1.61273	3.09901	1.13061	0.378207	6.12908	0.0949193	Tumor	BRCA
TCGA-B6-A0WS-01A	1.27093	2.93688	0.617846	0.669754	5.48451	0.125406	Tumor	BRCA
TCGA-B6-A0I5-01A	1.03506	2.00713	0.333584	0.388343	4.93702	0.0803665	Tumor	BRCA
TCGA-E2-A14P-01A	0.818881	1.38635	0.182273	0.812897	5.05121	0.4858	Tumor	BRCA
TCGA-GM-A2DF-01A	1.06404	3.26379	0.762554	0.416349	5.343	0.291425	Tumor	BRCA
TCGA-AQ-A04H-01B	1.47661	3.09735	0.493835	0.505842	5.11547	0.145272	Tumor	BRCA
TCGA-AC-A6NO-01A	1.96684	2.83256	1.4138	0.214651	5.10977	0.0188615	Tumor	BRCA
TCGA-BH-A0E9-01B	1.31904	2.58598	0.840219	0.708648	5.36374	1.29143	Tumor	BRCA
TCGA-E9-A1N4-11A	1.32648	2.07583	0.157915	1.38783	4.31194	0.20519	Normal	BRCA
TCGA-BH-A0B1-01A	0.928859	2.43956	0.35514	0.244019	4.93827	0.120808	Tumor	BRCA
TCGA-AR-A0TW-01A	0.607306	2.89085	0.110963	0.0573101	5.04319	1.34148	Tumor	BRCA
TCGA-AN-A0FX-01A	1.08903	2.0928	0.589848	0.199398	4.90029	0.0695564	Tumor	BRCA
TCGA-BH-A0BD-01A	0.730857	2.39769	0.0661542	0.297388	5.18575	0.0837697	Tumor	BRCA
TCGA-D8-A1JA-01A	1.38374	1.86338	0.108768	0.0167742	4.39848	0.0237925	Tumor	BRCA
TCGA-S3-AA11-01A	2.04241	2.79783	1.87703	0.176074	4.92359	0.388925	Tumor	BRCA
TCGA-AO-A03T-01A	1.44619	2.12008	0.708444	0.406969	4.72379	0.0825723	Tumor	BRCA
TCGA-AC-A3YI-01A	1.37871	2.26092	0.415985	0.537781	4.51692	0.23958	Tumor	BRCA
TCGA-BH-A0B2-01A	1.15917	2.44874	0.236638	0.733392	5.47257	0.0180881	Tumor	BRCA
TCGA-LL-A7T0-01A	2.35457	2.86332	2.74336	0.090486	4.59466	0.0649073	Tumor	BRCA
TCGA-BH-A0DH-01A	0.824499	2.56918	0.48685	0.199669	6.08775	0.0686086	Tumor	BRCA
TCGA-AC-A8OQ-01A	1.50511	2.50763	0.904527	0.328688	5.14271	0.048386	Tumor	BRCA
TCGA-C8-A12N-01A	1.74986	2.52672	1.03286	0.0244436	5.27788	0	Tumor	BRCA
TCGA-AO-A03U-01B	0.612446	2.76775	0.031962	0.396334	4.93883	0.0930162	Tumor	BRCA
TCGA-C8-A12T-01A	1.07078	2.05194	0.211992	0.0249134	4.58027	0.26079	Tumor	BRCA
TCGA-AO-A0J2-01A	1.17664	2.74162	0.443467	0.0751238	6.13936	0.336945	Tumor	BRCA
TCGA-D8-A27R-01A	1.438	3.75226	0.713254	0.36149	4.93694	0.19008	Tumor	BRCA
TCGA-A2-A0EU-01A	2.01474	2.92672	0.915845	0.110417	5.92367	0.143257	Tumor	BRCA
TCGA-AO-A12D-01A	1.21032	2.09581	0.254149	0.106639	5.42609	1.29805	Tumor	BRCA
TCGA-D8-A1XT-01A	0.979218	2.42669	0.14848	0.437115	5.00978	0.257078	Tumor	BRCA
TCGA-A2-A0CW-01A	1.52949	1.62231	1.55909	0.119309	5.12796	0.231677	Tumor	BRCA
TCGA-E2-A10F-01A	1.31489	2.55784	0.502666	0.374055	5.3527	0.369899	Tumor	BRCA
TCGA-BH-A0E7-01A	1.85269	2.63159	0.688713	0.0764733	5.36374	0.0681568	Tumor	BRCA
TCGA-D8-A1XG-01A	1.11459	2.69711	0.471628	0.0164503	5.60221	0.384855	Tumor	BRCA
TCGA-BH-A0AY-11A	0.972341	2.45315	0.187239	2.15423	4.79894	0.168126	Normal	BRCA
TCGA-E9-A1N8-01A	0.616185	1.63514	0.179941	0.0102379	6.01528	0	Tumor	BRCA
TCGA-E2-A2P5-01A	1.50461	3.02061	1.03468	0.188685	5.57875	0.297758	Tumor	BRCA
TCGA-BH-A18P-11A	1.07364	2.42913	0.273092	1.4557	4.36215	0.0671662	Normal	BRCA
TCGA-C8-A278-01A	1.13443	2.25557	0.449039	0.243413	5.27632	1.12165	Tumor	BRCA
TCGA-A8-A08R-01A	0.655102	2.85842	0.0464864	0.30193	5.4265	0.454112	Tumor	BRCA
TCGA-E2-A15A-01A	1.4797	3.1546	0.621223	0.0819594	5.28681	0.0442792	Tumor	BRCA
TCGA-BH-A1FE-11B	1.12173	1.63393	0.0923681	1.05327	3.62071	0.0616808	Normal	BRCA
TCGA-BH-A1EO-11A	0.443299	2.78246	0.0749774	2.70441	4.64369	1.83075	Normal	BRCA
TCGA-D8-A1JT-01A	0.760632	2.3481	0.179054	0.0619217	4.66731	0.0787744	Tumor	BRCA
TCGA-D8-A142-01A	1.45087	2.13347	0.734014	0.11551	5.59654	0.0903784	Tumor	BRCA
TCGA-A2-A3Y0-01A	0.797466	3.1579	0.848725	0.232694	6.22802	0	Tumor	BRCA
TCGA-AQ-A0Y5-01A	1.44165	2.93852	0.262184	0.0273781	4.67849	0.0577767	Tumor	BRCA
TCGA-A8-A07W-01A	1.58451	2.91655	0.39418	0.0884952	5.3453	0.20874	Tumor	BRCA
TCGA-A1-A0SM-01A	0.943363	2.09913	0.325664	0.124858	5.13025	2.81395	Tumor	BRCA
TCGA-AC-A3EH-01A	1.33303	2.70684	0.615968	0.128025	5.49446	0.0468206	Tumor	BRCA
TCGA-MS-A51U-01A	1.26969	3.51788	0.69279	0.475656	5.67276	0.20155	Tumor	BRCA
TCGA-AR-A24K-01A	1.03014	2.01261	0.589092	0.0305921	4.84287	0.0131287	Tumor	BRCA
TCGA-AC-A2BM-01A	1.8491	2.69598	0.385777	0.385213	5.64241	0.0176597	Tumor	BRCA
TCGA-A2-A3XY-01A	1.48119	2.54304	0.785526	0.748762	5.3683	0.0473392	Tumor	BRCA
TCGA-E2-A14W-01A	1.13249	2.09659	0.32233	0	5.10711	0.308202	Tumor	BRCA
TCGA-BH-A1F8-01A	1.01667	1.69697	0.137052	0.102377	4.663	0.143478	Tumor	BRCA
TCGA-E9-A1RA-01A	1.53839	2.70204	1.0255	0.28614	5.10792	0.202798	Tumor	BRCA
TCGA-A8-A0A6-01A	1.08698	2.03865	0.436812	0.616025	5.27082	0.287381	Tumor	BRCA
TCGA-AC-A7VC-01A	0.698093	2.34568	0.257286	0.464196	3.87049	0.0218685	Tumor	BRCA
TCGA-C8-A27B-01A	0.435351	2.69488	0.0636458	0.0664713	5.57052	0.104906	Tumor	BRCA
TCGA-S3-AA15-01A	1.31277	2.6829	0.416174	1.60036	5.38225	0.136728	Tumor	BRCA
TCGA-BH-A1ES-01A	2.03296	2.49948	0.525133	0.0378873	4.70918	1.46431	Tumor	BRCA
TCGA-E2-A1L6-01A	1.18534	3.14427	0.427473	0.459393	5.06864	0.24434	Tumor	BRCA
TCGA-BH-A0DT-11A	1.21318	2.32291	0.305988	0.768996	4.46251	0.950457	Normal	BRCA
TCGA-E9-A1R0-01A	1.16665	2.57708	0.538181	0.754576	5.48436	0.224066	Tumor	BRCA
TCGA-BH-A0B6-01A	1.01957	2.49698	0.4507	1.2951	5.93334	0.368168	Tumor	BRCA
TCGA-B6-A0RN-01A	1.90344	2.2464	0.306885	0.272657	4.94631	0.0371701	Tumor	BRCA
TCGA-A8-A09W-01A	0.813732	2.56061	0.0868081	0.183766	5.61894	0.991109	Tumor	BRCA
TCGA-EW-A1P3-01A	1.68635	3.00425	0.857767	0.220464	5.34366	0.0708095	Tumor	BRCA
TCGA-A7-A13F-11A	1.10497	2.35922	0.0753656	1.87672	4.4381	0.128295	Normal	BRCA
TCGA-A2-A0T6-01A	1.03527	2.08278	0.231725	0.808261	5.06792	0.181795	Tumor	BRCA
TCGA-A7-A5ZW-01A	0.971574	2.47829	0.296018	1.17416	5.12809	0.154255	Tumor	BRCA
TCGA-BH-A203-01A	0.608816	1.94449	0.216984	0.192351	5.10926	0.0592957	Tumor	BRCA
TCGA-DS-A7WI-01A	0.946396	1.93834	0.163273	0.290069	4.20851	0	Tumor	CESC
TCGA-EX-A449-01A	1.32717	3.55942	1.94542	0.123999	6.04522	0.0389219	Tumor	CESC
TCGA-VS-A958-01A	1.19439	2.44475	0.49592	0.272536	5.38312	0.0264147	Tumor	CESC
TCGA-MY-A5BE-01A	1.10368	2.85545	0.312638	3.05365	6.37455	0.209622	Tumor	CESC
TCGA-C5-A905-01A	1.18816	2.1664	0.715252	3.60462	4.34806	0.0353117	Tumor	CESC
TCGA-Q1-A73Q-01A	1.26822	2.1324	0.488744	0.85995	4.59527	0.0214573	Tumor	CESC
TCGA-BI-A0VR-01A	0.88095	2.64867	0.271237	2.73025	4.95123	0.0808608	Tumor	CESC
TCGA-EK-A2PK-01A	0.809898	1.95777	0.187216	0.232707	4.18612	0.0184534	Tumor	CESC
TCGA-FU-A3WB-01A	1.72877	2.49117	0.94068	2.09774	4.77432	0	Tumor	CESC
TCGA-MA-AA41-01A	1.43591	2.20761	0.443193	3.08476	3.56825	0.0212642	Tumor	CESC
TCGA-IR-A3LK-01A	0.597642	1.80043	0.24625	0.250459	4.73048	0.0892867	Tumor	CESC
TCGA-VS-A952-01A	1.87854	2.53812	1.88941	0.14103	5.53573	0	Tumor	CESC
TCGA-C5-A8YT-01A	1.44429	2.43278	0.392682	0.354555	4.80519	0	Tumor	CESC
TCGA-EA-A5ZD-01A	1.04411	3.03071	0.11556	1.0375	4.56344	0.039205	Tumor	CESC
TCGA-C5-A1MI-01A	2.31742	2.44577	0.785493	0.403935	4.70882	0.149588	Tumor	CESC
TCGA-EK-A2RO-01A	0.730243	2.29783	0.244932	1.17052	4.62727	0.0197053	Tumor	CESC
TCGA-FU-A3YQ-01A	1.41836	2.94303	0.742129	0.940378	4.52357	0.187252	Tumor	CESC
TCGA-C5-A7CL-01A	1.74106	3.31742	0.522379	1.86297	5.18559	0	Tumor	CESC
TCGA-VS-A9UB-01A	1.85752	2.90066	0.656637	2.98683	4.94359	0.0590713	Tumor	CESC
TCGA-C5-A1BM-01A	0.707135	2.23964	0.0832313	0.632729	4.66529	0.223703	Tumor	CESC
TCGA-C5-A2LY-01A	1.00538	2.27871	0.343676	1.38114	6.97396	0.022891	Tumor	CESC
TCGA-EA-A50E-01A	0.858937	2.5934	0.963998	0.547755	4.2725	0.34621	Tumor	CESC
TCGA-ZJ-AAXU-01A	0.82863	1.56999	0.286737	0.924154	4.7039	0	Tumor	CESC
TCGA-HM-A6W2-01A	1.11753	2.75279	0.851945	0.166016	5.38579	0.0370458	Tumor	CESC
TCGA-C5-A1MQ-01A	1.05329	2.80381	0.519615	0.561626	5.56434	0.0901061	Tumor	CESC
TCGA-C5-A1BE-01B	0.908441	2.3729	0.231944	0.75218	5.41617	0	Tumor	CESC
TCGA-C5-A1MN-01A	1.29589	3.55193	0.198682	0.276825	4.96211	0.101862	Tumor	CESC
TCGA-VS-A9U7-01A	1.46647	2.64986	1.56319	0.611893	5.43469	0.0255728	Tumor	CESC
TCGA-ZJ-AB0I-01A	1.02942	3.99277	0.265695	0.219615	3.92664	0.0238927	Tumor	CESC
TCGA-LP-A4AX-01A	1.22066	2.82004	0.314721	0.350577	5.34204	0	Tumor	CESC
TCGA-JW-A5VH-01A	1.7612	2.04524	0.966556	0.129751	4.78933	0	Tumor	CESC
TCGA-C5-A902-01A	1.61763	2.84435	0.301257	2.72216	5.59881	0.0364244	Tumor	CESC
TCGA-FU-A23L-01A	1.4703	3.40325	0.692043	0.973998	4.68894	0.0494323	Tumor	CESC
TCGA-FU-A3NI-01A	1.24994	3.81103	0.159162	3.56734	4.86928	0.011862	Tumor	CESC
TCGA-VS-A9UT-01A	1.8795	2.89046	0.566674	0.317178	5.8253	0.0671925	Tumor	CESC
TCGA-C5-A8YR-01A	1.40049	2.66552	0.673489	0.171041	5.52561	0.04486	Tumor	CESC
TCGA-VS-A94X-01A	0.709764	3.64041	0.363154	0.477504	3.83453	0	Tumor	CESC
TCGA-VS-A8EK-01A	1.14191	4.41957	1.21791	0.260137	4.76133	0.0194803	Tumor	CESC
TCGA-FU-A3HZ-01A	0.820722	1.97855	1.17171	0.0816238	5.35774	0.0988787	Tumor	CESC
TCGA-ZJ-AAXT-01A	1.19709	2.92311	0.48001	0.322699	4.19289	0	Tumor	CESC
TCGA-C5-A2LT-01A	0.542277	2.91514	0.367988	0.464988	5.05661	0.0595432	Tumor	CESC
TCGA-WL-A834-01A	0.454714	2.34167	0.0451374	0.331611	5.22783	0.429148	Tumor	CESC
TCGA-FU-A40J-01A	1.63464	2.68478	1.01586	0.155015	5.46198	0.0276556	Tumor	CESC
TCGA-MU-A5YI-01A	1.24703	3.49652	0.917615	1.16296	5.21571	0.0197232	Tumor	CESC
TCGA-MA-AA3W-01A	0.845857	2.6606	0.286854	1.2227	5.52547	0	Tumor	CESC
TCGA-EK-A2PG-01A	1.11665	3.39429	0.26673	1.02838	4.63313	0.0166535	Tumor	CESC
TCGA-UC-A7PG-06A	1.74767	3.22587	0.474779	1.6312	4.44549	0.0523813	Tumor	CESC
TCGA-EA-A5ZE-01A	1.497	2.96787	0.239909	0.50395	4.9425	0	Tumor	CESC
TCGA-4J-AA1J-01A	1.47956	2.7377	0.383036	0.16362	4.35178	0.0215747	Tumor	CESC
TCGA-C5-A7CH-01A	1.45821	3.18847	1.33458	1.47702	4.23109	0.0206413	Tumor	CESC
TCGA-C5-A8XH-01A	1.2245	3.06764	0.352528	0.710254	4.46365	0.0473433	Tumor	CESC
TCGA-JW-A69B-01A	1.38227	2.33482	0.917957	0.123305	5.45806	0.454797	Tumor	CESC
TCGA-ZX-AA5X-01A	1.39288	2.45534	0.409067	1.30666	4.40406	0.0347297	Tumor	CESC
TCGA-VS-A9V0-01A	1.22856	2.71497	0.269018	0.0227214	4.47314	0	Tumor	CESC
TCGA-EA-A97N-01A	1.70979	2.81889	0.364566	1.34994	4.86288	0.0694397	Tumor	CESC
TCGA-Q1-A73S-01A	1.99704	3.56863	1.14776	0.0928204	4.73998	0.0747094	Tumor	CESC
TCGA-ZJ-AAXA-01A	1.23291	3.13571	0.695412	0.833799	5.0152	0.0631615	Tumor	CESC
TCGA-DS-A0VL-01A	0.936434	2.32596	0.229601	0.51402	5.08117	0.0147226	Tumor	CESC
TCGA-C5-A1BN-01B	0.575815	3.08921	0.149012	0.823084	4.56713	0.0165717	Tumor	CESC
TCGA-EK-A2IR-01A	1.23125	2.65645	0.66436	0.659242	5.6333	0.0261663	Tumor	CESC
TCGA-C5-A2M1-01A	0.971373	2.36396	0.397358	0.295611	4.98023	0.0388917	Tumor	CESC
TCGA-C5-A7CJ-01A	1.11724	4.09218	0.313111	1.00042	4.12134	0.0587627	Tumor	CESC
TCGA-EA-A1QT-01A	1.08448	2.24052	0.280961	3.63962	5.14354	0	Tumor	CESC
TCGA-VS-A957-01A	1.78297	2.32287	0.796546	0.179567	4.49632	0.398378	Tumor	CESC
TCGA-JW-A5VK-01A	1.34288	2.3609	0.425519	2.0552	5.41767	0	Tumor	CESC
TCGA-EK-A2R7-01A	1.43445	2.20109	0.296859	0.810651	4.99376	0.0285363	Tumor	CESC
TCGA-EA-A4BA-01A	1.41777	1.56789	0.659486	0.141184	4.50431	0	Tumor	CESC
TCGA-EA-A411-01A	1.13626	3.18357	0.633366	0.227931	5.02144	0	Tumor	CESC
TCGA-HM-A6W2-06A	1.89628	2.63351	1.62418	0.0737717	5.40557	0	Tumor	CESC
TCGA-C5-A7UE-01A	0.866029	1.38184	1.04209	1.18194	4.46905	0.0234692	Tumor	CESC
TCGA-JW-A5VI-01A	1.54767	3.02993	0.659796	0.508153	5.19252	0.03665	Tumor	CESC
TCGA-VS-A9UD-01A	1.11376	2.31348	0.318755	0.745056	6.09715	0.190751	Tumor	CESC
TCGA-DS-A0VN-01A	1.13891	2.80115	0.420531	1.60282	4.38814	0.0370582	Tumor	CESC
TCGA-HM-A3JK-01A	1.48125	2.69012	0.34352	1.10102	5.12474	0	Tumor	CESC
TCGA-LP-A5U3-01A	0.91652	2.34628	0.132987	1.20744	5.07669	0.0187034	Tumor	CESC
TCGA-DG-A2KH-01A	0.771427	2.60029	0.353817	0.103244	5.19845	0.0126262	Tumor	CESC
TCGA-C5-A2LS-01A	1.71685	2.99312	0.591909	0.0723408	4.99308	0	Tumor	CESC
TCGA-IR-A3LH-01A	0.844271	3.92994	0.176372	0.558006	6.4334	0.0992472	Tumor	CESC
TCGA-Q1-A5R3-01A	1.01872	1.09811	0.849676	0.401988	5.23241	0	Tumor	CESC
TCGA-MA-AA3X-01A	1.44584	3.25857	1.36232	2.63734	4.76312	0.755812	Tumor	CESC
TCGA-VS-A954-01A	0.876412	2.84102	0.791182	0.464715	4.79685	0.106305	Tumor	CESC
TCGA-EA-A3HS-01A	1.25319	3.42548	0.571778	0.322991	4.39517	0.225274	Tumor	CESC
TCGA-EA-A3HR-01A	1.31237	3.16288	0.52507	5.32597	4.99195	0.0239398	Tumor	CESC
TCGA-ZJ-AB0H-01A	0.960868	2.51753	0.928516	0.330616	5.05324	0.217548	Tumor	CESC
TCGA-JX-A3Q0-01A	1.65508	3.41823	0.597346	1.20606	5.75906	0.131334	Tumor	CESC
TCGA-DS-A3LQ-01A	1.12731	3.18665	1.45898	0.760545	5.11113	0.342929	Tumor	CESC
TCGA-EK-A2R8-01A	0.86286	2.70019	0.324041	0.0173581	4.16759	0.0367723	Tumor	CESC
TCGA-FU-A3TX-01A	1.11497	2.20177	0.219113	0.407741	5.64442	0	Tumor	CESC
TCGA-EA-A556-01A	2.00476	1.97984	1.09643	0.0585099	5.49082	0	Tumor	CESC
TCGA-VS-A9UO-01A	1.81891	2.43891	1.84918	0.0301858	5.54752	0	Tumor	CESC
TCGA-EX-A3L1-01A	0.460606	2.30974	0.0824037	0.206177	4.94889	0.0156714	Tumor	CESC
TCGA-C5-A7CM-01A	1.60003	1.88131	0.876203	0	5.59299	0.0209275	Tumor	CESC
TCGA-ZJ-AAXF-01A	1.69626	2.55519	0.681705	1.837	5.00237	0.0285021	Tumor	CESC
TCGA-2W-A8YY-01A	1.16628	2.43659	0.787327	0.0686863	5.98288	0.22527	Tumor	CESC
TCGA-VS-A9UR-01A	2.59238	2.62798	0.852958	0.182101	5.00341	0	Tumor	CESC
TCGA-C5-A7X3-01A	0.758937	2.7306	0.38242	0.186902	4.67595	0	Tumor	CESC
TCGA-HM-A4S6-01A	1.61792	2.7511	0.320053	5.17529	5.44052	0.149769	Tumor	CESC
TCGA-FU-A770-01A	1.10281	2.98644	0.588272	0.191365	4.94242	0.02279	Tumor	CESC
TCGA-VS-A9UC-01A	1.62852	3.31449	0.567103	0.17515	5.14399	0.0197236	Tumor	CESC
TCGA-DS-A1OC-01A	0.631266	2.755	0.168203	0.162637	5.36892	0.117477	Tumor	CESC
TCGA-EX-A69M-01A	1.43583	1.97093	0.138966	0.475917	4.57453	0	Tumor	CESC
TCGA-C5-A1MK-01A	1.48173	3.01011	0.390545	0.698607	4.4467	0.0165719	Tumor	CESC
TCGA-JW-A5VJ-01A	1.26581	4.52024	1.06098	0.919705	3.91511	0.116005	Tumor	CESC
TCGA-EX-A1H6-01B	1.31955	2.26676	1.18394	0.145058	4.71157	0.0154158	Tumor	CESC
TCGA-EA-A3Y4-01A	1.0696	2.10902	0.42892	0.0608631	3.77507	0.013198	Tumor	CESC
TCGA-JW-A5VL-01A	1.54716	2.24723	1.2491	0.503583	5.68106	0	Tumor	CESC
TCGA-EA-A1QS-01A	1.28529	2.7395	0.197032	0.230129	4.69833	0.0796278	Tumor	CESC
TCGA-EK-A2PM-01A	0.790747	2.27213	0.403403	0.835415	5.77376	0.0474797	Tumor	CESC
TCGA-JX-A3PZ-01A	0.525207	2.17477	0.141296	0.430319	3.85275	0.0663455	Tumor	CESC
TCGA-DG-A2KK-01A	1.9944	2.07847	0.974575	0.107583	4.93056	0.0583595	Tumor	CESC
TCGA-VS-A8QM-01A	1.54452	3.41536	0.536352	1.8699	4.9522	0.0934721	Tumor	CESC
TCGA-C5-A7CO-01A	0.88543	2.34983	0.481076	1.76416	5.42579	0	Tumor	CESC
TCGA-VS-A9UH-01A	1.28622	2.58344	0.67505	0.609453	5.67762	0.223223	Tumor	CESC
TCGA-EA-A439-01A	1.53574	2.55439	0.50748	0.0296148	4.52895	0	Tumor	CESC
TCGA-EK-A3GJ-01A	1.3944	3.70494	1.14656	0.431796	4.5625	0	Tumor	CESC
TCGA-EA-A3HQ-01A	1.32577	2.68247	0.264498	0.220059	4.88444	0.163035	Tumor	CESC
TCGA-EA-A6QX-01A	1.32169	3.15816	0.372065	0.190259	5.62859	0.0195827	Tumor	CESC
TCGA-C5-A7UI-01A	0.821708	3.31168	0.479073	3.89225	5.37905	0.0269913	Tumor	CESC
TCGA-ZJ-AAXD-01A	1.19524	2.68988	0.434997	0.218481	5.23303	0	Tumor	CESC
TCGA-LP-A4AV-01A	0.848881	0.677655	1.08097	0.478485	5.36474	0	Tumor	CESC
TCGA-VS-A950-01A	1.31842	2.83932	0.733151	1.45566	4.65969	0	Tumor	CESC
TCGA-C5-A3HD-01B	1.25478	2.39478	0.11294	0.331093	5.21572	0.0157883	Tumor	CESC
TCGA-DS-A5RQ-01A	1.17295	3.51524	0.20548	0.429446	5.66972	0.209675	Tumor	CESC
TCGA-VS-A9UP-01A	1.79115	3.5922	1.90682	0.060433	4.47363	0.0260884	Tumor	CESC
TCGA-C5-A7CG-01A	1.42197	2.49107	0.347574	2.01569	5.36708	0.0712371	Tumor	CESC
TCGA-MY-A5BD-01A	1.29529	2.76992	0.778603	0.0702033	5.58268	0.021754	Tumor	CESC
TCGA-C5-A1M6-01A	2.73318	2.98288	0.219625	0	4.78806	0.0194583	Tumor	CESC
TCGA-VS-A8QF-01A	1.15923	3.67589	0.456858	1.03673	4.53156	0.0587088	Tumor	CESC
TCGA-EK-A2RE-01A	1.00798	3.46536	0.585395	0.52315	3.83317	0	Tumor	CESC
TCGA-UC-A7PG-01A	1.41556	2.96656	0.29636	0.957083	3.45152	0.0186875	Tumor	CESC
TCGA-VS-AA62-01A	1.13015	2.41966	0.286451	0.47884	4.77584	0.246784	Tumor	CESC
TCGA-C5-A2M2-01A	1.45041	2.35819	1.48902	0.0892806	5.77992	0	Tumor	CESC
TCGA-MA-AA3Y-01A	0.607998	1.94555	0.0868678	3.01679	4.51463	0.0165412	Tumor	CESC
TCGA-MY-A913-01A	0.987362	1.94787	0.656661	0.565461	5.64207	0	Tumor	CESC
TCGA-C5-A7CK-01A	1.03538	2.34377	0.331875	0.470477	4.58505	0.0304905	Tumor	CESC
TCGA-UC-A7PI-01A	1.6462	4.31034	1.18867	0.0771986	4.94454	0.0371039	Tumor	CESC
TCGA-C5-A7X5-01A	0.878638	3.77982	0.0436457	0.46464	5.25148	0	Tumor	CESC
TCGA-DG-A2KJ-01A	1.08125	0.485982	0.896612	1.00067	6.03731	0	Tumor	CESC
TCGA-VS-A9V3-01A	1.90895	3.26245	1.24977	4.45101	4.52502	0	Tumor	CESC
TCGA-DS-A7WF-01A	2.14903	3.81664	1.06507	0.117982	5.71701	0	Tumor	CESC
TCGA-C5-A8XK-01A	1.07537	2.82051	0.222809	0.692605	4.785	0.0209146	Tumor	CESC
TCGA-EA-A5FO-01A	1.37242	3.29498	1.00793	1.25109	5.23355	0.0440253	Tumor	CESC
TCGA-VS-A9UZ-01A	1.52619	3.57508	0.972257	0.612369	5.53842	0	Tumor	CESC
TCGA-EK-A2IP-01A	1.872	3.47095	0.639769	0.958346	4.42445	0.0951586	Tumor	CESC
TCGA-VS-A94W-01A	1.53819	3.2129	0.266499	1.33683	5.90509	0	Tumor	CESC
TCGA-DS-A1OB-01A	0.799384	2.87485	0.628502	1.2757	5.15219	0.326788	Tumor	CESC
TCGA-EA-A410-01A	1.4898	2.19725	0.488935	0.104303	5.57757	0.0930563	Tumor	CESC
TCGA-EX-A8YF-01A	1.29902	2.63019	0.609348	0.112899	5.44122	0.0207223	Tumor	CESC
TCGA-EK-A2H0-01A	1.41881	2.19224	1.02921	0.469509	4.38952	0.0296556	Tumor	CESC
TCGA-VS-A9UV-01A	0.932214	2.55415	0.79064	0.941749	4.75745	0	Tumor	CESC
TCGA-LP-A7HU-01A	1.12422	1.78096	1.12738	0.163449	6.20587	0.0637107	Tumor	CESC
TCGA-VS-A8EI-01A	1.05305	2.27618	0.885742	0.550124	5.56359	0.0840697	Tumor	CESC
TCGA-BI-A0VS-01A	0.942741	1.95907	0.165301	0.729865	4.58181	0.0335641	Tumor	CESC
TCGA-DS-A0VM-01A	0.861025	3.23666	0.140254	0.0707042	4.50487	0	Tumor	CESC
TCGA-IR-A3LB-01A	1.07392	2.16775	0.848374	0.0267591	4.09833	0.121469	Tumor	CESC
TCGA-VS-A8EC-01A	1.24842	2.4177	0.996843	0.526432	4.85108	0.0203853	Tumor	CESC
TCGA-VS-A9V2-01A	1.36934	2.27961	0.954298	1.57407	5.17453	0.0513043	Tumor	CESC
TCGA-EK-A3GN-01A	1.62857	2.78076	0.417237	0.0333328	4.15514	0.0425189	Tumor	CESC
TCGA-IR-A3LA-01A	1.47002	2.86094	0.142019	0.154839	5.15937	0.077131	Tumor	CESC
TCGA-C5-A7X8-01A	1.97886	2.24833	1.31822	0.633283	4.47251	0	Tumor	CESC
TCGA-EK-A2RL-01A	1.3649	2.68495	1.30975	0.028211	5.02192	0.160823	Tumor	CESC
TCGA-C5-A0TN-01A	0.678023	2.61489	0.16284	0.0395024	4.62768	0	Tumor	CESC
TCGA-FU-A57G-01A	0.702446	2.02915	0.600113	0.0447943	5.3854	0.164874	Tumor	CESC
TCGA-EK-A2PI-01A	1.80909	2.56098	0.395704	1.75986	4.18916	0.0839081	Tumor	CESC
TCGA-Q1-A73P-01A	1.01122	2.58879	0.71828	0.303744	5.17436	0.0573113	Tumor	CESC
TCGA-C5-A1MP-01A	1.18671	3.10175	3.45332	2.93238	5.11849	0.0806761	Tumor	CESC
TCGA-VS-A8EL-01A	1.42777	2.96915	1.13892	0.577749	5.4149	0.148825	Tumor	CESC
TCGA-C5-A1BQ-01C	1.36153	2.37176	1.00459	1.01207	5.17387	0.0624779	Tumor	CESC
TCGA-ZJ-AAXI-01A	1.23383	1.97188	0.477278	1.31876	4.16028	0.0516208	Tumor	CESC
TCGA-FU-A23K-01A	1.31926	0.673537	0.312162	0.429668	5.36346	0.105903	Tumor	CESC
TCGA-Q1-A6DT-01A	1.16002	3.05717	1.10702	0.717977	4.12838	0	Tumor	CESC
TCGA-EK-A2H1-01A	1.14816	2.67833	0.351704	0.178791	4.86109	0	Tumor	CESC
TCGA-C5-A1M5-01A	1.10394	3.05653	0.885365	1.83077	5.12862	0.142947	Tumor	CESC
TCGA-EA-A44S-01A	1.35022	2.61972	1.15295	4.00655	5.01078	0.565593	Tumor	CESC
TCGA-EA-A78R-01A	1.01478	1.83157	0.483335	0.683317	5.05776	0.0222861	Tumor	CESC
TCGA-C5-A7XC-01A	1.09091	2.64725	0.178676	1.76742	5.67549	0.0233714	Tumor	CESC
TCGA-VS-A9V4-01A	2.53914	2.63841	0.266688	0.510488	3.69876	0.114117	Tumor	CESC
TCGA-EK-A2RA-01A	1.07874	2.91033	0.297804	1.05164	4.19202	0	Tumor	CESC
TCGA-EX-A1H5-01A	1.14187	2.51976	0.347673	0.454789	5.79099	0	Tumor	CESC
TCGA-VS-A953-01A	0.70089	1.89253	0.240479	1.31206	4.76949	0.058635	Tumor	CESC
TCGA-MA-AA3Z-01A	0.848279	3.5279	0.18483	0.362647	5.45816	0	Tumor	CESC
TCGA-VS-A959-01A	1.34624	2.56057	0.522462	0.360505	5.41328	0.0906764	Tumor	CESC
TCGA-FU-A3EO-01A	1.14453	1.50269	0.76757	0.197691	5.25557	0.237546	Tumor	CESC
TCGA-BI-A20A-01A	1.0519	3.59218	0.152864	0.822626	5.56258	0.0625441	Tumor	CESC
TCGA-DS-A1OD-01A	1.82428	2.1277	0.778188	1.39439	5.07985	0.110112	Tumor	CESC
TCGA-C5-A1M9-01A	1.02685	2.43393	0.138042	0	5.10508	0	Tumor	CESC
TCGA-MY-A5BF-11A	0.471644	2.21066	0.112473	1.5605	4.43532	0.0844192	Normal	CESC
TCGA-Q1-A6DW-01A	1.08846	2.3191	0.205539	0.228885	3.92475	0	Tumor	CESC
TCGA-C5-A3HF-01A	1.0024	2.48472	0.501313	0.984475	4.74822	0.0152815	Tumor	CESC
TCGA-VS-A8Q9-01A	1.66375	2.84687	0.390744	1.15609	6.24816	0.0200744	Tumor	CESC
TCGA-Q1-A5R2-01A	0.976241	2.64691	0.618084	0.205102	5.56106	0.0553326	Tumor	CESC
TCGA-VS-A8Q8-01A	1.37171	2.8143	0.195788	0.691574	4.98605	0.0438554	Tumor	CESC
TCGA-C5-A1BJ-01A	1.01112	3.7007	0.554547	1.19127	4.76252	0.00886773	Tumor	CESC
TCGA-Q1-A6DV-01A	1.66661	3.0708	0.513761	0.122746	4.72164	0.0944309	Tumor	CESC
TCGA-EK-A3GK-01A	1.17554	2.77481	0.547089	0.0772078	5.0853	0.0511305	Tumor	CESC
TCGA-IR-A3LF-01A	1.60312	2.8505	1.24704	0.332969	4.87703	0	Tumor	CESC
TCGA-C5-A1M7-01A	1.31208	2.53794	0.250687	2.14615	3.91862	0.012662	Tumor	CESC
TCGA-EK-A2PL-01A	1.33846	3.97951	0.286113	0.528608	4.00022	0	Tumor	CESC
TCGA-LP-A4AU-01A	1.23473	2.48501	0.289425	4.54949	4.0626	0	Tumor	CESC
TCGA-ZJ-AAXJ-01A	0.998608	1.09217	0.504414	2.02722	4.46104	0.0269459	Tumor	CESC
TCGA-VS-A94Z-01A	1.15647	2.18292	0.27438	0.563446	5.26433	0.0599919	Tumor	CESC
TCGA-EK-A2GZ-01A	0.533224	3.3445	0.316258	0.14502	4.87084	0	Tumor	CESC
TCGA-JW-A852-01A	0.909928	1.21982	0.772219	0.467577	5.76759	0	Tumor	CESC
TCGA-VS-A9V5-01A	1.7373	3.34941	1.53738	0.151217	5.5127	0.170821	Tumor	CESC
TCGA-ZJ-AAXB-01A	0.654138	1.66225	0.252227	0.0211873	6.16207	0.0448181	Tumor	CESC
TCGA-EK-A2R9-01A	1.12221	1.75661	0.4831	0.352993	6.23743	0	Tumor	CESC
TCGA-C5-A3HE-01A	0.993729	1.74291	0.356345	0.28131	4.16268	0.0153245	Tumor	CESC
TCGA-ZJ-A8QR-01A	0.875683	3.23685	0.148908	0.259455	5.26624	0	Tumor	CESC
TCGA-EK-A2RC-01A	1.14845	2.69119	0.648751	1.17484	5.3122	0	Tumor	CESC
TCGA-C5-A1ML-01A	1.29432	2.70154	0.577601	0.524984	5.20311	0.048293	Tumor	CESC
TCGA-FU-A5XV-01A	0.635748	2.51166	0.228301	0.294444	4.53359	0	Tumor	CESC
TCGA-EA-A43B-01A	0.536221	2.21135	0.537654	0.356958	4.76594	0	Tumor	CESC
TCGA-MA-AA42-01A	0.848567	3.18955	0.457014	2.4607	6.53573	0.0226568	Tumor	CESC
TCGA-VS-A9UJ-01A	1.40486	2.51036	1.40605	0.0141116	5.63444	0.0299321	Tumor	CESC
TCGA-VS-A9V1-01A	1.96383	2.29012	0.4452	0.246376	3.60383	0	Tumor	CESC
TCGA-JW-AAVH-01A	1.90249	3.50475	0.764028	1.49818	4.89896	0.0232083	Tumor	CESC
TCGA-VS-A8EJ-01A	1.32994	1.80479	1.53217	0.0808637	5.19078	0	Tumor	CESC
TCGA-Q1-A73O-01A	0.850574	2.41177	0.199333	0.406304	4.41293	0.0314296	Tumor	CESC
TCGA-FU-A2QG-01A	0.969923	2.36393	1.20918	1.34121	4.41283	0	Tumor	CESC
TCGA-DS-A1O9-01A	1.19915	3.33259	0.15078	0.286736	5.33822	0.0527198	Tumor	CESC
TCGA-VS-A8QA-01A	2.11381	2.64298	1.57022	0.0731939	5.0726	0	Tumor	CESC
TCGA-C5-A1MH-01A	1.47301	2.87629	0.973031	2.46824	5.69861	0.614018	Tumor	CESC
TCGA-XS-A8TJ-01A	1.16883	3.27868	1.60595	0.795776	4.98884	0.0181489	Tumor	CESC
TCGA-C5-A1ME-01A	1.28725	1.42187	1.11043	0.629899	4.28547	0	Tumor	CESC
TCGA-C5-A2LZ-01A	1.55543	2.7848	0.558619	1.97452	4.66946	0.0313458	Tumor	CESC
TCGA-HM-A3JJ-11A	1.16241	2.8853	0.150406	1.47646	4.1872	0.0130321	Normal	CESC
TCGA-GH-A9DA-01A	0.486471	2.19464	0.439079	0.168598	4.64415	0	Tumor	CESC
TCGA-VS-A8QH-01A	1.88678	2.20508	1.34647	0.0321843	4.00463	0.111285	Tumor	CESC
TCGA-VS-A9U6-01A	1.71642	2.46232	0.437747	0.224596	4.92966	0.0171746	Tumor	CESC
TCGA-C5-A8YQ-01A	0.793334	2.7077	0.302048	0.721819	4.91112	0.0198405	Tumor	CESC
TCGA-DS-A1OA-01A	1.01999	2.72891	0.241398	2.05527	5.24319	0.119215	Tumor	CESC
TCGA-HG-A2PA-01A	1.49248	3.09651	0.440723	0.882916	5.03513	0	Tumor	CESC
TCGA-EA-A3QD-01A	1.77952	2.97815	0.424447	0.868746	5.04496	0.221002	Tumor	CESC
TCGA-C5-A7UC-01A	0.412525	2.53008	0.0376893	0.0777101	4.4885	0.0373532	Tumor	CESC
TCGA-MA-AA43-01A	1.13311	2.65559	0.332093	1.01448	3.98965	0.0190148	Tumor	CESC
TCGA-Q1-A73R-01A	2.02869	2.4617	0.949675	0.118249	6.1482	0.0130817	Tumor	CESC
TCGA-PN-A8MA-01A	2.50947	2.47925	0.796669	0.411096	4.6604	0.0234014	Tumor	CESC
TCGA-C5-A2LV-01A	0.617602	2.13108	0.154835	2.95359	4.89518	0.013435	Tumor	CESC
TCGA-VS-A9UQ-01A	1.68002	2.69063	1.18325	0.194114	5.52137	0	Tumor	CESC
TCGA-MY-A5BF-01A	0.755829	3.23582	0.38964	4.9252	4.78722	0.0397466	Tumor	CESC
TCGA-JX-A3Q8-01A	1.38929	3.15138	1.0706	0.340337	5.63686	0.0781054	Tumor	CESC
TCGA-VS-A9UM-01A	1.3109	4.68979	0.355003	0.788301	5.23073	0.23916	Tumor	CESC
TCGA-VS-A8EH-01A	1.62626	2.8806	0.712585	1.3242	4.76295	0	Tumor	CESC
TCGA-LP-A4AW-01A	1.15737	2.59032	0.651904	0.469736	4.88881	0	Tumor	CESC
TCGA-C5-A1MJ-01A	1.35537	2.29982	0.682086	0.0536883	4.6751	0.112186	Tumor	CESC
TCGA-UC-A7PD-01A	0.94794	2.2834	0.154753	0.541303	4.08119	0	Tumor	CESC
TCGA-EK-A2RK-01A	0.998817	2.43396	0.430625	1.13067	5.48685	0.0674618	Tumor	CESC
TCGA-Q1-A5R1-01A	1.38124	2.5551	1.7446	0.391105	5.2805	0.04492	Tumor	CESC
TCGA-VS-A9U5-01A	1.04979	2.92334	0.959209	0.821933	5.87408	0.303259	Tumor	CESC
TCGA-EA-A3QE-01A	1.33644	2.95243	0.543936	1.83075	5.28956	0.0471271	Tumor	CESC
TCGA-EK-A3GM-01A	1.59226	3.09891	0.332804	0.0123698	4.45961	0	Tumor	CESC
TCGA-EA-A3HT-01A	1.17858	3.31281	0.113862	0.316481	4.55633	0.0125246	Tumor	CESC
TCGA-IR-A3L7-01A	1.5746	3.53072	0.441428	0.728802	5.14012	0.0998001	Tumor	CESC
TCGA-C5-A2LX-01A	1.30849	1.54023	1.11418	1.35335	5.69332	0	Tumor	CESC
TCGA-MU-A51Y-01A	1.01564	3.16219	0.416969	2.28355	5.28967	0.0542489	Tumor	CESC
TCGA-JX-A5QV-01A	0.808523	2.69104	1.19904	0.566395	5.3467	0.11523	Tumor	CESC
TCGA-FU-A3HY-01A	0.450893	3.17414	0.108964	0.374258	4.65482	0	Tumor	CESC
TCGA-MU-A8JM-01A	0.733747	1.58903	0.314286	1.01683	4.82919	0	Tumor	CESC
TCGA-RA-A741-01A	1.80124	2.47238	0.506514	1.68842	4.90136	0.0492606	Tumor	CESC
TCGA-C5-A1BF-01B	0.679812	3.10148	0.150234	0.496853	5.19742	0.0146353	Tumor	CESC
TCGA-C5-A3HL-01A	1.00015	2.5944	0.23304	2.29965	5.06344	0	Tumor	CESC
TCGA-EK-A2RN-01A	1.77724	1.78087	0.352161	1.15691	3.84172	0	Tumor	CESC
TCGA-C5-A901-01A	0.937598	2.99284	0.533802	5.83952	4.09422	0.2471	Tumor	CESC
TCGA-VS-A9UI-01A	1.69954	2.78962	0.269464	4.75968	4.7162	0	Tumor	CESC
TCGA-VS-A9UY-01A	1.74184	2.40878	0.204067	1.79824	4.90491	0	Tumor	CESC
TCGA-C5-A1MF-01A	0.638334	1.4085	0.130118	0.13968	5.89674	0	Tumor	CESC
TCGA-VS-A9UL-01A	2.15462	2.55188	0.85844	0.0235042	5.56859	0.0738857	Tumor	CESC
TCGA-ZJ-AAXN-01A	1.27297	2.38991	0.202204	0.810903	3.70327	0	Tumor	CESC
TCGA-ZJ-A8QQ-01A	1.28473	2.22373	1.05039	0.567169	4.34795	0.018406	Tumor	CESC
TCGA-C5-A8XI-01A	1.10199	2.82122	0.244267	0.912674	5.13664	0	Tumor	CESC
TCGA-C5-A8XJ-01A	1.7995	2.59507	0.944926	0.857881	4.89275	0.0391412	Tumor	CESC
TCGA-EA-A5ZF-01A	1.83369	3.00427	0.380004	0.0188142	4.73237	0.0593468	Tumor	CESC
[truncated: 9,059 more rows]
